# Supplementary material
Source: publisher figshare collection journal article supplement (https://acs.figshare.com/ndownloader/files/4562065)

# Supporting Information

## Directed ortho-Borylation of Functionalized Arenes Catalyzed by a Silica-Supported Compact Phosphine-Iridium System

Soichiro Kawamorita,<sup>†</sup> Hirohisa Ohmiya,<sup>†</sup> Kenji Hara,<sup>‡</sup> Atsushi Fukuoka<sup>‡</sup> and Masaya Sawamura<sup>\*,†</sup>

*Department of Chemistry, Faculty of Science, Hokkaido University, Sapporo 060-0810, Japan, and  
Catalysis Research Center, Hokkaido University, Sapporo 001-0021, Japan*

### Table of Contents

|                                                                                                          |         |
|----------------------------------------------------------------------------------------------------------|---------|
| 1) Instrumentation and Chemicals                                                                         | S1      |
| 2) Typical Procedures                                                                                    | S2      |
| 3) Ir-Catalyzed Borylation of Methyl Benzoate ( <b>1a</b> )<br>with Soluble Phosphine Ligands (Table S1) | S2–S3   |
| 4) Compounds Characterization                                                                            | S3–S10  |
| 5) NMR spectra of Borylation Products                                                                    | S11–S58 |

### Instrumentation and Chemical

NMR spectra were recorded on a Varian Gemini 2000 spectrometer, operating at 300 MHz for <sup>1</sup>H NMR and 75.4 MHz for <sup>13</sup>C NMR. Chemical shift values for <sup>1</sup>H and <sup>13</sup>C are reference to Me<sub>4</sub>Si and the residual solvent resonances respectively. Chemical shifts are reported in δ ppm. Elemental analysis was performed at the Center for Instrument Analysis, Hokkaido University. High-resolution mass spectra were recorded on a JEOL JMS-700TZ mass spectrometer, JEOL JMS-FABmate mass spectrometer or JEOL JMS-T100LC mass spectrometer at the Center for Instrument Analysis, Hokkaido University. TLC analyses were performed on commercial glass plates bearing 0.25-mm layer of Merck Silica gel 60F<sub>254</sub>. Silica gel (Kanto Chemical Co., Silica gel 60 N, spherical, neutral) was used for column chromatography. Gas chromatographic (GC) analyses were conducted on a Shimadzu GC-14B equipped with a flame ionization detector.

All reactions were carried out under nitrogen atmosphere. Materials were obtained from commercial suppliers or prepared according to standard procedures unless otherwise noted. Silica-SMAP was prepared according to the reported procedure.<sup>1</sup> All solvents for catalytic reactions were degassed via four freeze–pump–thaw cycles before use. [Ir(OMe)(cod)]<sub>2</sub> was prepared according to the literature.<sup>2</sup> Bis(pinacolato)diboron was purchased from AllyChem Co., Ltd.

## Typical Procedures

**Typical Procedure for the ortho-Borylation of Functionalized Arenes (Table 1, entry 1).** In a glove box, Silica-SMAP ( $0.064 \text{ mmol P g}^{-1}$ , 39 mg, 0.0025 mmol), bis(pinacolato)diboron (**2**, 127 mg, 0.5 mmol) and anhydrous, degassed hexane (1.1 mL) were placed in a 10 mL-glass tube containing magnetic stirring bar, and the mixture was stirred for 1 min at 25 °C.  $[\text{Ir}(\text{OMe})(\text{cod})]_2$  (0.8 mg, 0.00125 mmol) in hexane (0.4 mL) and methyl benzoate (**1a**, 136 mg, 1.0 mmol) were added in the tube, which was then sealed with a screw cap. The tube was removed from the glove box. After the resulting mixture was stirred at 25 °C for 2 hours, the mixture was filtered through a glass pipet equipped with a cotton filter. Solvent was removed under reduced pressure. An internal standard (1,1,2,2-tetrachloroethane) was added to the reaction mixture. The yield of the product was determined by  $^1\text{H}$  NMR. TLC analysis of the crude material revealed that the  $R_f$  values of **3a** and the diborylated compound were 0.7 and 0.2, respectively (hexane/diethyl ether = 50/50). Flash silica gel column chromatography (hexane/diethyl ether = 100/0–80/20) of the crude product provided (**3a**, 116.5 mg, 0.44 mmol) in 89% isolated yield.

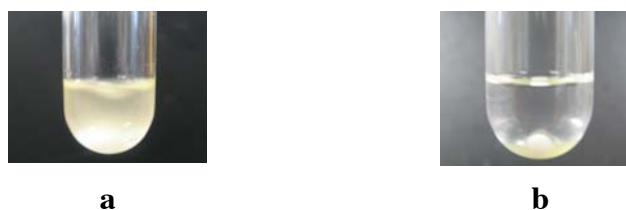

**Figure S1.** Photographs of the reactor system during (a) and after the reaction (b)

**Large-Scale ortho-Borylation of Methyl Benzoate (eq 1).** In a glove box, Silica-SMAP ( $0.065 \text{ mmol P g}^{-1}$ , 8.0 mg, 0.0005 mmol), bis(pinacolato)diboron (**2**, 2.54 g, 10.0 mmol) was placed in a 10 mL-glass tube containing magnetic stirring bar.  $[\text{Ir}(\text{OMe})(\text{cod})]_2$  (0.16 mg, 0.00025 mmol) and methyl benzoate (**1a**, 2.5 mL, 20.0 mmol) were added. After being sealed with a screw cap, the tube was removed from the glove box. The resulting mixture was heated at 100 °C for 3 hours. After the mixture was cooled to room temperature, the mixture was filtered through a glass pipet equipped with a cotton filter. Solvent was removed under reduced pressure. Flash silica gel column purification (hexane/diethyl ether = 100:0–80:20) of the crude product provided (**3a**, 2.33 g, 8.8 mmol) in 88% isolated yield.

### Ir-Catalyzed Borylation of Methyl Benzoate (**1a**) with Soluble Phosphine Ligands at 70 °C.

Even with  $\text{Ph}_3\text{P}$ ,  $(t\text{-Bu})_3\text{P}$ ,  $\text{Cy}_3\text{P}$  and  $\text{Me}_3\text{P}$  (Ir/P 1:1 or 1:2) the borylation of **1a** proceeded at 70 °C (20 h), but **3a** was obtained in low yields and/or was contaminated with meta and para-borylation products (Table S1). The Ir-to-phosphine ratio of 1:1 provided the borylation

product in much higher yield. In terms of the yield of **3a**, PCy<sub>3</sub> was the best ligand among the homogeneous phosphines examined, but **3a** obtained with PCy<sub>3</sub> was contaminated with meta- and para-borylation products (Table S1, entries 12 and 13).

**Typical Procedure for Ir-Catalyzed Borylation of Methyl Benzoate (**1a**) with Soluble Phosphine Ligands at 70 °C (Table S1).** In a glove box, bis(pinacolato)diboron (**2**, 127 mg, 0.5 mmol) and anhydrous, degassed hexane (0.7 or 0.9 mL) were placed in a 10 mL-glass tube containing magnetic stirring bar. Phosphine ligand (0.005 or 0.0025 mmol) in hexane (0.4 or 0.2 mL), [Ir(OMe)(cod)]<sub>2</sub> (0.8 mg, 0.00125 mmol) in hexane (0.4 mL) and methyl benzoate (**1a**, 136 mg, 1.0 mmol) were added to the tube in this order. The tube was then sealed with a screw cap, and was removed from the glove box. After the resulting mixture was stirred at 70 °C for 20 hours, the mixture was filtered through a short plug of silica gel. Solvent was removed under reduced pressure. An internal standard (1,1,2,2-tetrachloroethane) was added to the reaction mixture. The yield of the product was determined by <sup>1</sup>H NMR.

**Table S1.** Ir-Catalyzed Borylation of Methyl Benzoate (**1a**) with Soluble Phosphine Ligands

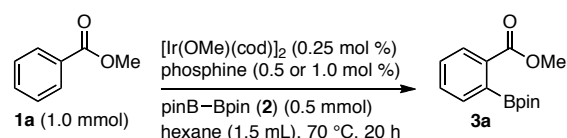

| entry | phosphine [P]                 | [Ir]/[P] | NMR yield (%) | ratio of <i>o</i> /( <i>m</i> + <i>p</i> ) |
|-------|-------------------------------|----------|---------------|--------------------------------------------|
| 1     | none                          | —        | 10            | >20:1                                      |
| 2     | Ph-SMAP                       | 1:1      | 12            | >20:1                                      |
| 3     | Ph-SMAP                       | 1:2      | 0             | —                                          |
| 4     | 4-CF <sub>3</sub> -Ph-SMAP    | 1:1      | 8             | >20:1                                      |
| 5     | 4-CF <sub>3</sub> -Ph-SMAP    | 1:2      | 3             | >20:1                                      |
| 6     | PPh <sub>3</sub>              | 1:1      | 57            | 92:8                                       |
| 7     | PPh <sub>3</sub>              | 1:2      | 0             | —                                          |
| 8     | PMe <sub>3</sub>              | 1:1      | 31            | >20:1                                      |
| 9     | PMe <sub>3</sub>              | 1:2      | 0             | —                                          |
| 10    | P( <i>t</i> -Bu) <sub>3</sub> | 1:1      | 15            | >20:1                                      |
| 11    | P( <i>t</i> -Bu) <sub>3</sub> | 1:2      | 9             | >20:1                                      |
| 12    | PCy <sub>3</sub>              | 1:1      | 100           | 90:10                                      |
| 13    | PCy <sub>3</sub>              | 1:2      | 87            | 96:4                                       |

## Compounds Characterization

The starting materials shown in Tables 1 and 2 are known compounds. Compound **3a** is found in the literature.<sup>3</sup>

### 3,5-Dimethyl-2-(4,4,5,5-tetramethyl-1,3,2-dioxaborolan-2-yl)benzoic Acid Methyl Ester (3b)

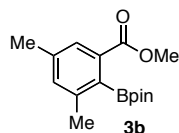

White solid.  $R_f$  0.4 (hexane/diethyl ether = 90/10).  $^1\text{H}$  NMR ( $\text{CDCl}_3$ )  $\delta$  1.44 (s, 12H), 2.31 (s, 3H), 2.40 (s, 3H), 3.89 (s, 3H), 7.13 (s, 1H), 7.59 (s, 1H).  $^{13}\text{C}$  NMR ( $\text{CDCl}_3$ )  $\delta$  20.86, 21.22, 25.10, 51.98, 83.60, 126.58, 133.28, 134.42, 138.27, 141.21, 168.86. A signal for the carbon directly attached to the boron atom was not observed. HRMS–ESI ( $m/z$ ):  $[\text{M}+\text{Na}]^+$  calcd for  $\text{C}_{16}\text{H}_{23}\text{BO}_4\text{Na}$ , 313.15871; found, 313.15946. m.p. 60.0–62.9 °C.

The characterization of the diborylated compound was performed by GC analysis and  $^1\text{H}$  NMR spectrum of the isolated product.  $R_f$  0.1 (hexane/diethyl ether = 90/10).  $^1\text{H}$  NMR ( $\text{CDCl}_3$ )  $\delta$  1.39 (s, 24H), 2.38 (s, 6H), 3.90 (s, 3H), 7.08 (s, 1H).

### 3,6-Dimethyl-2-(4,4,5,5-tetramethyl-1,3,2-dioxaborolan-2-yl)benzoic Acid Methyl Ester (3c)

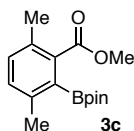

Oil.  $R_f$  0.5 (hexane/diethyl ether = 80/20).  $^1\text{H}$  NMR ( $\text{CDCl}_3$ )  $\delta$  1.39 (s, 12H), 2.41 (s, 6H), 3.90 (s, 3H), 7.08 (d,  $J$  = 7.5 Hz, 1H), 7.14 (d,  $J$  = 7.5 Hz, 1H).  $^{13}\text{C}$  NMR ( $\text{CDCl}_3$ )  $\delta$  21.06, 21.16, 25.18, 52.07, 83.66, 132.14, 132.51, 134.44, 134.61, 139.46, 171.29. A signal for the carbon directly attached to the boron atom was not observed. HRMS–ESI ( $m/z$ ):  $[\text{M}+\text{Na}]^+$  calcd for  $\text{C}_{16}\text{H}_{23}\text{BO}_4\text{Na}$ , 313.15871; found, 313.15979.

### 5-Isopropyl-2-(4,4,5,5-tetramethyl-1,3,2-dioxaborolan-2-yl)benzoic Acid Methyl Ester (3d)

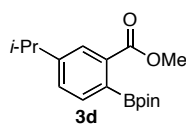

Oil.  $R_f$  0.4 (hexane/diethyl ether = 90/10).  $^1\text{H}$  NMR ( $\text{CDCl}_3$ )  $\delta$  1.23 (d,  $J$  = 6.9 Hz, 6H), 1.40 (s, 12H), 2.93 (q,  $J$  = 6.9 Hz, 1H), 3.91 (s, 3H), 7.37 (dd,  $J$  = 7.8, 1.5 Hz, 1H), 7.43 (d,  $J$  = 7.8 Hz, 1H), 7.79 (d,  $J$  = 1.5 Hz, 1H).  $^{13}\text{C}$  NMR ( $\text{CDCl}_3$ )  $\delta$  23.66, 24.74, 33.91, 52.13, 83.88, 126.97, 130.16, 132.48, 133.76, 150.14, 168.86. A signal for the carbon directly attached to the boron atom was not observed. HRMS–ESI ( $m/z$ ):  $[\text{M}+\text{Na}]^+$  calcd for  $\text{C}_{17}\text{H}_{25}\text{BO}_4\text{Na}$ , 327.17436; found, 327.17509.

### 2-Methoxy-6-(4,4,5,5-tetramethyl-1,3,2-dioxaborolan-2-yl)benzoic Acid Methyl Ester (3e)

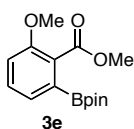

Oil.  $R_f$  0.4 (hexane/diethyl ether = 50/50).  $^1\text{H}$  NMR ( $\text{CDCl}_3$ )  $\delta$  1.32 (s, 12H), 3.84 (s, 3H), 3.89 (s, 3H), 7.01 (dd,  $J$  = 7.8, 1.2 Hz, 1H), 7.32 (dd,  $J$  = 7.8 1.2 Hz, 1H), 7.38 (d,  $J$  = 7.8 Hz, 1H).  $^{13}\text{C}$  NMR ( $\text{CDCl}_3$ )  $\delta$  24.66, 52.19, 55.88, 84.04, 113.79, 126.56, 128.15, 130.58, 156.13, 169.24. A signal for the carbon directly attached to the boron atom was not observed. HRMS–ESI ( $m/z$ ):  $[\text{M}+\text{Na}]^+$  calcd for  $\text{C}_{15}\text{H}_{21}\text{BO}_5\text{Na}$ , 315.13797; found, 315.13800.

**2-(4,4,5,5-Tetramethyl-1,3,2-dioxaborolan-2-yl)-6-trifluoromethylbenzoic Acid Methyl Ester (3f)**

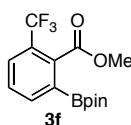

Oil.  $R_f$  0.4 (benzene).  $^1\text{H}$  NMR ( $\text{CDCl}_3$ )  $\delta$  1.33 (s, 12H), 3.91 (s, 3H), 7.53 (t,  $J$  = 7.5 Hz, 1H), 7.75 (d,  $J$  = 7.5 Hz, 1H), 7.98 (d,  $J$  = 7.5 Hz, 1H).  $^{13}\text{C}$  NMR ( $\text{CDCl}_3$ )  $\delta$  24.55, 52.53, 84.53, 123.56 (q,  $J$  = 274.2 Hz, 1C), 126.95 (q,  $J$  = 32.0 Hz), 128.34 (q,  $J$  = 4.5 Hz), 128.96, 137.33 (q,  $J$  = 2.3 Hz), 138.39 (q,  $J$  = 1.1 Hz), 168.74. A signal for the carbon directly attached to the boron atom was not observed. HRMS–ESI ( $m/z$ ):  $[\text{M}+\text{Na}]^+$  calcd for  $\text{C}_{15}\text{H}_{18}\text{BF}_3\text{O}_4\text{Na}$ , 353.11479; found, 353.11422.

**5-Methoxy-2-(4,4,5,5-tetramethyl-1,3,2-dioxaborolan-2-yl)benzoic Acid Methyl Ester (3g)**

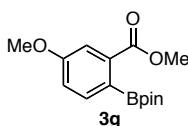

Oil.  $R_f$  0.3 (hexane/ethyl acetate = 80/20).  $^1\text{H}$  NMR ( $\text{CDCl}_3$ )  $\delta$  1.39 (s, 12H), 3.82 (s, 3H), 3.89 (s, 3H), 7.04 (dd,  $J$  = 8.1, 2.1 Hz, 1H), 7.43 (d,  $J$  = 2.1 Hz, 1H), 7.44 (d,  $J$  = 8.1 Hz, 1H).  $^{13}\text{C}$  NMR ( $\text{CDCl}_3$ )  $\delta$  24.65, 52.18, 55.17, 83.76, 113.64, 117.95, 133.86, 135.53, 160.36, 168.42. A signal for the carbon directly attached to the boron atom was not observed. HRMS–ESI ( $m/z$ ):  $[\text{M}+\text{Na}]^+$  calcd for  $\text{C}_{15}\text{H}_{21}\text{BO}_5\text{Na}$ , 315.13797; found, 315.13703.

**2-(4,4,5,5-Tetramethyl-1,3,2-dioxaborolan-2-yl)-5-trifluoromethylbenzoic Acid Methyl Ester (3h)**

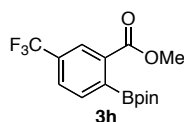

White solid.  $R_f$  0.4 (chloroform).  $^1\text{H}$  NMR ( $\text{CDCl}_3$ )  $\delta$  1.43 (s, 12H), 3.95 (s, 3H), 7.62 (d,  $J$  = 7.8 Hz, 1H), 7.76 (dd,  $J$  = 7.8, 0.9 Hz, 1H), 8.20 (d,  $J$  = 0.9 Hz, 1H).  $^{13}\text{C}$  NMR ( $\text{CDCl}_3$ )  $\delta$  24.69, 52.63, 84.47, 123.71 (q,  $J$  = 273.0 Hz), 125.52 (q,  $J$  = 4.0 Hz), 128.29 (q,  $J$  = 4.0 Hz), 131.43 (q,  $J$  = 33.2 Hz), 132.86, 134.20, 167.35. A signal for the carbon directly attached to the boron atom was not observed. HRMS–ESI ( $m/z$ ):  $[\text{M}+\text{Na}]^+$  calcd for  $\text{C}_{15}\text{H}_{18}\text{BF}_3\text{O}_4\text{Na}$ , 353.11479; found, 353.11417. m.p.

59.1–61.8 °C.

#### 4-Methoxy-2-(4,4,5,5-tetramethyl-1,3,2-dioxaborolan-2-yl)benzoic Acid Methyl Ester (3i)

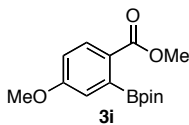

White solid.  $R_f$  0.3 (hexane/diethyl ether = 50/50).  $^1\text{H}$  NMR ( $\text{CDCl}_3$ )  $\delta$  1.42 (s, 12H), 3.84 (s, 3H), 3.88 (s, 3H), 6.88 (dd,  $J = 8.7, 2.4$  Hz, 1H), 6.94 (d,  $J = 2.4$  Hz, 1H), 7.91 (d,  $J = 8.7$  Hz, 1H).  $^{13}\text{C}$  NMR ( $\text{CDCl}_3$ )  $\delta$  24.71, 51.96, 55.25, 84.01, 114.15, 117.02, 125.56, 131.04, 162.54, 168.19. A signal for the carbon directly attached to the boron atom was not observed. HRMS–ESI ( $m/z$ ):  $[\text{M}+\text{Na}]^+$  calcd for  $\text{C}_{15}\text{H}_{21}\text{BO}_5\text{Na}$ , 315.13797; found, 315.13657. m.p. 76.8–77.3 °C.

The characterization of the diborylated product was performed by GC analysis and  $^1\text{H}$  NMR spectrum of the crude material.  $R_f$  0.2 (hexane/diethyl ether = 50/50).  $^1\text{H}$  NMR ( $\text{CDCl}_3$ )  $\delta$  1.37 (s, 24H), 7.02 (s, 2H) (only observed peaks).

#### 2-(4,4,5,5-Tetramethyl-1,3,2-dioxaborolan-2-yl)-4-trifluoromethyl Benzoic Acid Methyl Ester (3j)

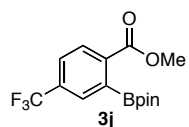

Oil.  $R_f$  0.4 (hexane/diethyl ether = 90/10).  $^1\text{H}$  NMR ( $\text{CDCl}_3$ )  $\delta$  1.43 (s, 12H), 3.95 (s, 3H), 7.68 (dd,  $J = 8.1, 1.2$  Hz, 1H), 7.74 (s, 1H), 8.04 (d,  $J = 8.1$  Hz, 1H).  $^{13}\text{C}$  NMR ( $\text{CDCl}_3$ )  $\delta$  24.73, 52.66, 84.52, 123.79 (q,  $J = 273.0$  Hz), 126.10 (q,  $J = 3.4$  Hz), 129.09, 129.18 (q,  $J = 3.4$  Hz), 133.41 (q,  $J = 32.0$  Hz), 136.82 (q,  $J = 1.1$  Hz), 167.58. A signal for the carbon directly attached to the boron atom was not observed. HRMS–FAB ( $m/z$ ):  $[\text{M}+\text{H}]^+$  calcd for  $\text{C}_{15}\text{H}_{19}\text{BF}_3\text{O}_4$ , 331.1331; found, 331.1306. The regioselectivity was assigned on the basis of the  $J_{\text{C-F}}$  values in the  $^{13}\text{C}$  NMR spectrum.

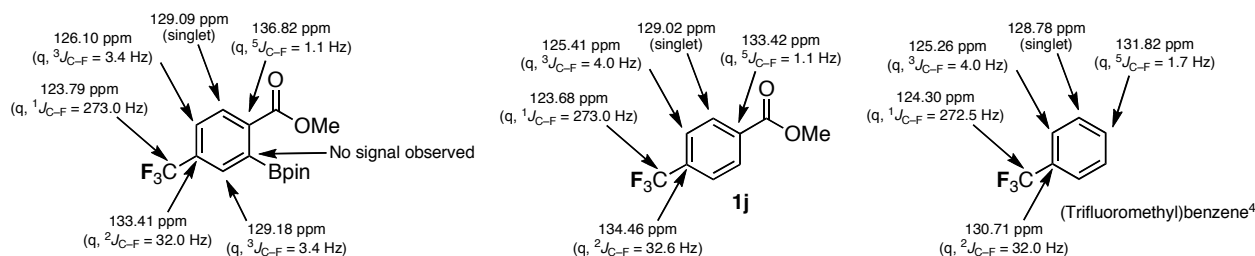

The characterization of the diborylated product was performed by GC analysis and  $^1\text{H}$  NMR spectrum of the crude material.  $^1\text{H}$  NMR ( $\text{CDCl}_3$ )  $\delta$  1.35 (s, 24H), 3.90 (s, 3H), 7.98 (s, 2H).

#### 2-(4,4,5,5-Tetramethyl-1,3,2-dioxaborolan-2-yl)benzoic Acid *tert*-Butyl Ester (3k)

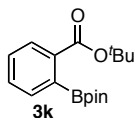

White solid.  $R_f$  0.5 (hexane/diethyl ether = 80/20).  $^1\text{H}$  NMR ( $\text{CDCl}_3$ )  $\delta$  1.41 (s, 12H), 1.57 (s, 9H), 7.35 (m, 1H), 7.43–7.48 (m, 2H), 7.81 (d,  $J$  = 7.8 Hz, 1H).  $^{13}\text{C}$  NMR ( $\text{CDCl}_3$ )  $\delta$  24.69, 28.03, 81.25, 83.73, 128.10, 128.62, 131.28, 131.80, 135.91, 167.56. A signal for the carbon directly attached to the boron atom was not observed. HRMS–ESI ( $m/z$ ):  $[\text{M}+\text{Na}]^+$  calcd for  $\text{C}_{17}\text{H}_{25}\text{BO}_4\text{Na}$ , 327.17436; found, 327.17392. m.p. 76.6–77.6 °C.

***N,N*-Dimethyl-2-(4,4,5,5-tetramethyl-1,3,2-dioxaborolan-2-yl)benzamide (3l)**

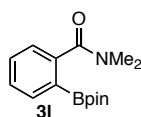

White solid.  $R_f$  0.3 (hexane/ethyl acetate = 50/50).  $^1\text{H}$  NMR ( $\text{CDCl}_3$ )  $\delta$  1.31 (s, 12H), 2.97 (brs, 6H), 7.30 (dd,  $J$  = 7.5, 0.6 Hz, 1H), 7.37 (dt,  $J$  = 7.5, 1.5 Hz, 1H), 7.45 (dt,  $J$  = 7.5, 1.5 Hz, 1H), 7.80 (dd,  $J$  = 7.5, 0.6 Hz, 1H).  $^{13}\text{C}$  NMR ( $\text{CDCl}_3$ )  $\delta$  24.82, 83.52, 125.59, 128.27, 131.00, 135.09, 142.61, 172.65. A signal for the carbon directly attached to the boron atom was not observed. Anal. Calcd for  $\text{C}_{15}\text{H}_{22}\text{O}_3\text{BN}$ : C, 65.48; H, 8.06%. Found: C, 65.46; H, 8.15%. m.p. 86.0–87.1 °C.

**2-(4,4,5,5-Tetramethyl-1,3,2-dioxaborolan-2-yl)benzenesulfonic Acid Methyl Ester (3m)**

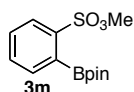

Oil.  $R_f$  0.5 (chloroform).  $^1\text{H}$  NMR ( $\text{CDCl}_3$ )  $\delta$  1.41 (s, 12H), 3.80 (s, 3H), 7.53–7.62 (m, 3H), 7.94 (d,  $J$  = 7.7 Hz, 1H).  $^{13}\text{C}$  NMR ( $\text{CDCl}_3$ )  $\delta$  24.54, 56.23, 84.63, 128.19, 129.80, 132.70, 133.30, 137.78. A signal for the carbon directly attached to the boron atom was not observed. HRMS–ESI ( $m/z$ ):  $[\text{M}+\text{Na}]^+$  calcd for  $\text{C}_{13}\text{H}_{19}\text{BO}_5\text{SNa}$ , 321.09439; found, 321.09386.

The characterization of the diborylated product was performed by GC analysis and  $^1\text{H}$  NMR spectrum of the crude material.  $R_f$  0.1 (chloroform).  $^1\text{H}$  NMR ( $\text{CDCl}_3$ )  $\delta$  1.39 (s, 24H), 3.85 (s, 3H) (only observed peaks).

**2-(4,4,5,5-Tetramethyl-1,3,2-dioxaborolan-2-yl)phenyl-1,3-dioxane (3n)**

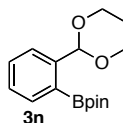

Oil.  $R_f$  0.2 (dichloromethane).  $^1\text{H}$  NMR ( $\text{CDCl}_3$ )  $\delta$  1.35 (s, 12H), 1.41 (dm,  $J$  = 12.0 Hz, 1H), 2.21 (m, 1H), 4.01 (tm,  $J$  = 12.0 Hz, 2H), 4.22 (ddm,  $J$  = 12.0, 3.9 Hz, 2H), 6.02 (s, 1H), 7.30 (td,  $J$  = 7.2, 1.2 Hz, 1H), 7.43 (td,  $J$  = 7.5, 1.2 Hz, 1H), 7.68 (dm,  $J$  = 7.5 Hz, 1H), 7.73 (dd,  $J$  = 7.2, 1.2

Hz, 1H).  $^{13}\text{C}$  NMR ( $\text{CDCl}_3$ )  $\delta$  24.74, 25.70, 67.28, 83.51, 100.34, 124.75, 127.80, 130.59, 134.93, 143.77. A signal for the carbon directly attached to the boron atom was not observed. HRMS–ESI ( $m/z$ ):  $[\text{M}+\text{Na}]^+$  calcd for  $\text{C}_{16}\text{H}_{23}\text{BO}_4$ , 313.15871; found, 313.16005.

The characterization of the diborylated compound was performed by GC analysis and  $^1\text{H}$  NMR spectrum of the isolated product.  $R_f$  0.05 (dichloromethane).  $^1\text{H}$  NMR ( $\text{CDCl}_3$ )  $\delta$  1.35 (s, 24H), 1.38 (d,  $J = 12.0$  Hz, 1H), 2.24 (m, 1H), 4.01 (td,  $J = 12.0, 2.1$  Hz, 2H), 4.24 (dd,  $J = 6.3, 4.8$  Hz, 2H), 6.09 (s, 1H), 7.27 (t,  $J = 7.5$  Hz, 1H), 7.58 (d,  $J = 12.0$  Hz, 2H).

### 2-(2-Methoxymethylphenyl)-4,4,5,5-tetramethyl-1,3,2-dioxaborolane (3o)

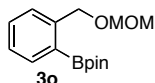

Oil.  $R_f$  0.5 (chloroform).  $^1\text{H}$  NMR ( $\text{CDCl}_3$ )  $\delta$  1.34 (s, 12H), 3.42 (s, 3H), 4.75 (s, 2H), 4.85 (s, 2H), 7.30 (dd,  $J = 6.9, 1.8$  Hz, 1H), 7.40–7.48 (m, 2H), 7.81 (d,  $J = 6.9$  Hz, 1H).  $^{13}\text{C}$  NMR ( $\text{CDCl}_3$ )  $\delta$  24.74, 55.25, 69.12, 83.62, 96.30, 126.89, 128.07, 131.01, 135.93, 144.16. A signal for the carbon directly attached to the boron atom was not observed. HRMS–ESI ( $m/z$ ):  $[\text{M}+\text{Na}]^+$  calcd for  $\text{C}_{15}\text{H}_{23}\text{BO}_4\text{Na}$ , 301.15871; found, 301.15850.

The characterization of the diborylated compound was performed by GC analysis and  $^1\text{H}$  NMR spectrum of the isolated product.  $R_f$  0.2 (chloroform).  $^1\text{H}$  NMR ( $\text{CDCl}_3$ )  $\delta$  1.34 (s, 24H), 3.43 (s, 3H), 4.75 (s, 2H), 5.06 (s, 2H), 7.29 (t,  $J = 7.5$  Hz, 1H), 7.85 (d,  $J = 7.5$  Hz, 2H).

### 2-(4,4,5,5-Tetramethyl-1,3,2-dioxaborolan-2-yl)-1-chlorobenzene (3p)

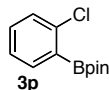

Oil.  $R_f$  0.7 (hexane/diethyl ether = 80/20).  $^1\text{H}$  NMR ( $\text{CDCl}_3$ )  $\delta$  1.37 (s, 12H), 7.22 (m, 1H), 7.32–7.35 (m, 2H), 7.69 (dm,  $J = 6.9$  Hz, 1H).  $^{13}\text{C}$  NMR ( $\text{CDCl}_3$ )  $\delta$  24.66, 84.12, 125.87, 129.44, 131.92, 136.49, 139.61. A signal for the carbon directly attached to the boron atom was not observed. HRMS–EI ( $m/z$ ):  $[\text{M}]^+$  calcd for  $\text{C}_{12}\text{H}_{16}\text{BO}_2\text{Cl}$ , 238.0932; found, 238.0927.

The characterization of the diborylated product was performed by GC analysis and  $^1\text{H}$  NMR spectrum of the crude material.  $R_f$  0.6 (hexane/diethyl ether = 80/20).  $^1\text{H}$  NMR ( $\text{CDCl}_3$ )  $\delta$  1.36 (s, 24H) (only observed peaks).

### 2-(4,4,5,5-Tetramethyl-1,3,2-dioxaborolan-2-yl)-4-trifluoromethyl-1-chlorobenzene (3q)

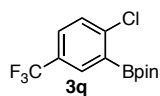

Oil.  $R_f$  0.7 (benzene).  $^1\text{H}$  NMR ( $\text{CDCl}_3$ )  $\delta$  1.38 (s, 12H), 7.47 (d,  $J = 8.4$  Hz, 1H), 7.59 (dd,  $J = 8.4, 2.1$  Hz, 1H), 7.95 (d,  $J = 2.1$  Hz, 1H).  $^{13}\text{C}$  NMR ( $\text{CDCl}_3$ )  $\delta$  24.67, 84.63, 123.94 (q,  $J = 272.5$  Hz), 128.42 (q,  $J = 33.2$  Hz), 128.56 (q,  $J = 4.0$  Hz), 129.94, 133.39 (q,  $J = 4.0$  Hz), 143.50 (q,  $J =$



1.7 Hz). A signal for the carbon directly attached to the boron atom was not observed. HRMS–ESI ( $m/z$ ):  $[M+H]^+$  calcd for  $C_{13}H_{16}BClF_3O_2$ , 307.08840; found, 306.08721. The regioselectivity was assigned on the basis of the  $J_{C-F}$  values in the  $^{13}C$  NMR spectrum.

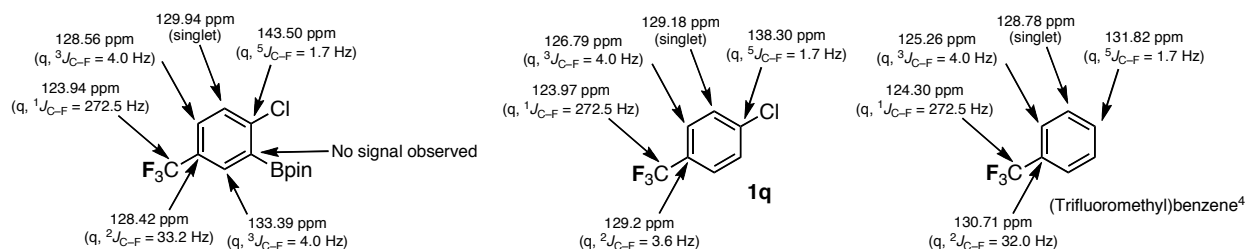

The characterization of the diborylated product was performed by GC analysis and  $^1H$  NMR spectrum of the crude material.  $^1H$  NMR ( $CDCl_3$ )  $\delta$  1.37 (s, 24H), 7.97 (s, 2H).

#### 4-Chloro-2-(4,4,5,5-tetramethyl-1,3,2-dioxaborolan-2-yl)benzoic Acid Ethyl Ester (3r)

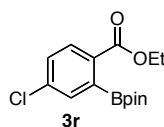

Oil.  $R_f$  0.6 (hexane/diethyl ether = 50/50).  $^1H$  NMR ( $CDCl_3$ )  $\delta$  1.37 (t,  $J = 7.2$  Hz, 3H), 1.42 (s, 12H), 4.37 (q,  $J = 7.2$  Hz, 2H), 7.37 (dd,  $J = 8.4, 2.1$  Hz, 1H), 7.44 (d,  $J = 2.1$  Hz, 1H), 7.87 (d,  $J = 8.4$  Hz, 1H).  $^{13}C$  NMR ( $CDCl_3$ )  $\delta$  14.14, 24.71, 61.43, 84.30, 129.06, 130.07, 132.16, 132.17, 138.69, 167.41. A signal for the carbon directly attached to the boron atom was not observed. Anal. Calcd for  $C_{15}H_{20}BClO_4$ : C, 58.01; H, 6.49%. Found: C, 57.91; H, 6.45%.

The regiochemistry was determined by comparison of the  $^1H$  NMR chemical shifts with the other ortho-borylated benzoate products. The chemical shifts of the proton at the aromatic C6 position are diagnostic of the regiochemistry. On the ortho-borylated benzoate derivatives, the protons at C6 position appeared at the lowest field ( $\delta$  7.6–8.2). In the case of **3r**, the C6 proton appeared at the lowest field ( $\delta$  7.87), which indicates that **3r** is the ortho isomer.

The characterization of the diborylated compound was performed by GC analysis and  $^1H$  NMR spectrum of the isolated product.  $R_f$  0.3 (hexane/diethyl ether = 50/50).  $^1H$  NMR ( $CDCl_3$ )  $\delta$  1.33 (s, 24H), 1.39 (t,  $J = 7.2$  Hz, 3H), 4.36 (q,  $J = 7.2$  Hz, 2H), 7.68 (s, 2H).

#### 3-Chloro-6-methoxy-2-(4,4,5,5-tetramethyl-1,3,2-dioxaborolan-2-yl)benzoic Acid Methyl Ester (3s)

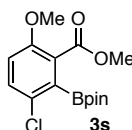

White solid.  $R_f$  0.3 (benzene).  $^1H$  NMR ( $CDCl_3$ )  $\delta$  1.42 (s, 12H), 3.84 (s, 3H), 3.91 (s, 3H), 6.90 (d,  $J = 8.7$  Hz, 1H), 7.39 (d,  $J = 8.8$  Hz, 1H).  $^{13}C$  NMR ( $CDCl_3$ )  $\delta$  24.91, 52.58, 56.18, 84.28, 114.30, 125.12, 129.14, 133.21, 156.85, 168.37. A signal for the carbon directly attached to the boron atom

was not observed. HRMS–ESI ( $m/z$ ):  $[M+Na]^+$  calcd for  $C_{15}H_{20}BClO_5Na$ , 349.09900; found, 349.09793. m.p. 61.9–63.3 °C.

## References

- (1) (a) Hamasaka, G.; Ochida, A.; Hara, K.; Sawamura, M. *Angew. Chem. Int. Ed.* **2007**, *46*, 5381–5383. (b) Hamasaka, G.; Kawamorita, S.; Ochida, A.; Akiyama, R.; Hara, K.; Fukuoka, A.; Asakura, K.; Chun, W. J.; Ohmiya, H.; Sawamura, M. *Organometallics* **2008**, *27*, 6495–6506.
- (2) Uson, R.; Oro, L. A.; Cabeza, J. A. *Inorg. Synth.* **1985**, *23*, 126.
- (3) Wolan, A.; Zaidlewicz, M. *Org. Biomol. Chem.* **2003**, *1*, 3274–3276.
- (4) Takahashi, K.; Yoshino, A.; Hosokawa, K.; Muramatsu, H. *Bull. Chem. Soc. Jpn.* **1985**, *58*, 755–756.

STANDARD 1H OBSERVE

<sup>1</sup>H NMR (CDCl<sub>3</sub>)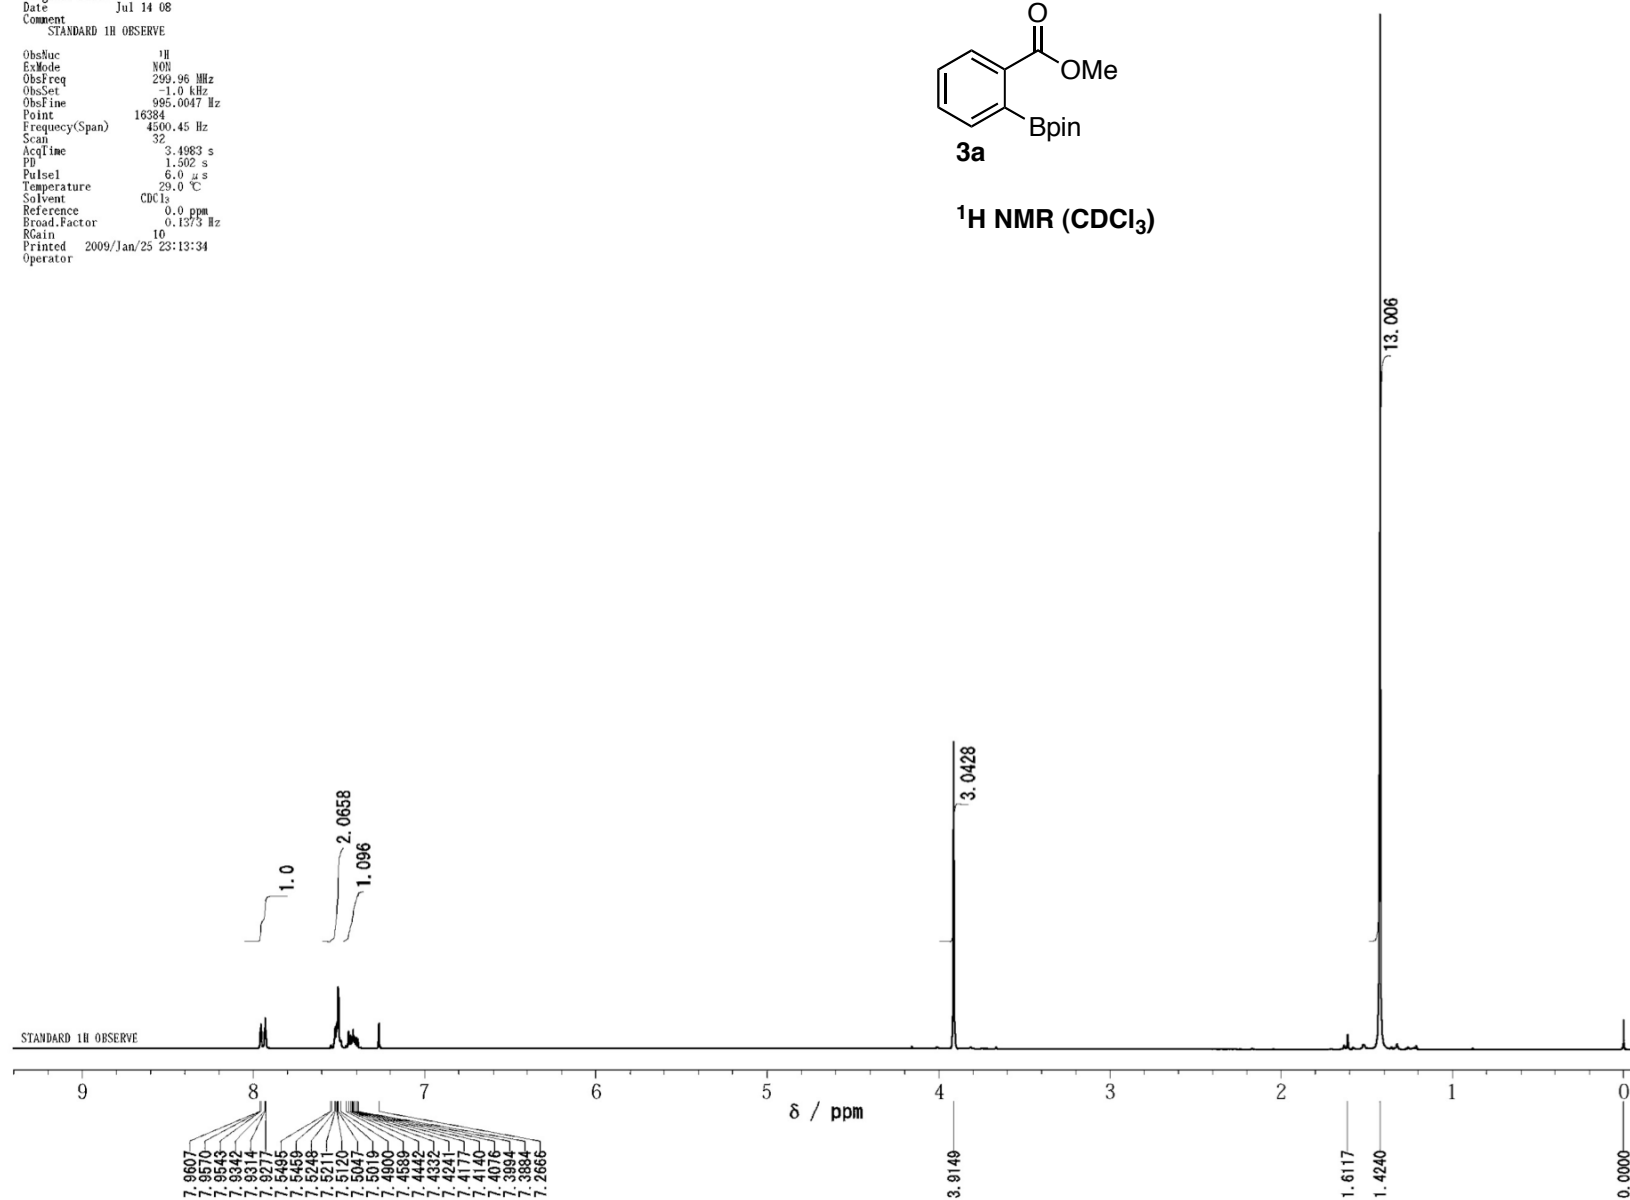

Original File:  
 Date Oct 10 08  
 Comment C13 Standard Observe  
 Stick=none Tune=6.4 Match=0.4  
 ObsNuc <sup>13</sup>C  
 ExMode NOH  
 ObsFreq 75.43 MHz  
 ObsSet -1.0 kHz  
 ObsFine 996.3672 Hz  
 Point 32768  
 Frequency(Span) 18761.73 Hz  
 Scan 416  
 AcqTime 1.4992 s  
 PD 1.501 s  
 Pulse1 6.0 μs  
 Temperature 29.0 °C  
 Solvent CDCl<sub>3</sub>  
 Reference 77.0 ppm  
 Broad.Factor 0.2863 Hz  
 RGain 30  
 Printed 2009/Jan/25 23:14:30  
 Operator

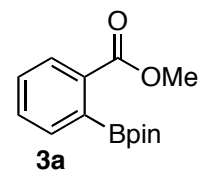

<sup>13</sup>C NMR (CDCl<sub>3</sub>)

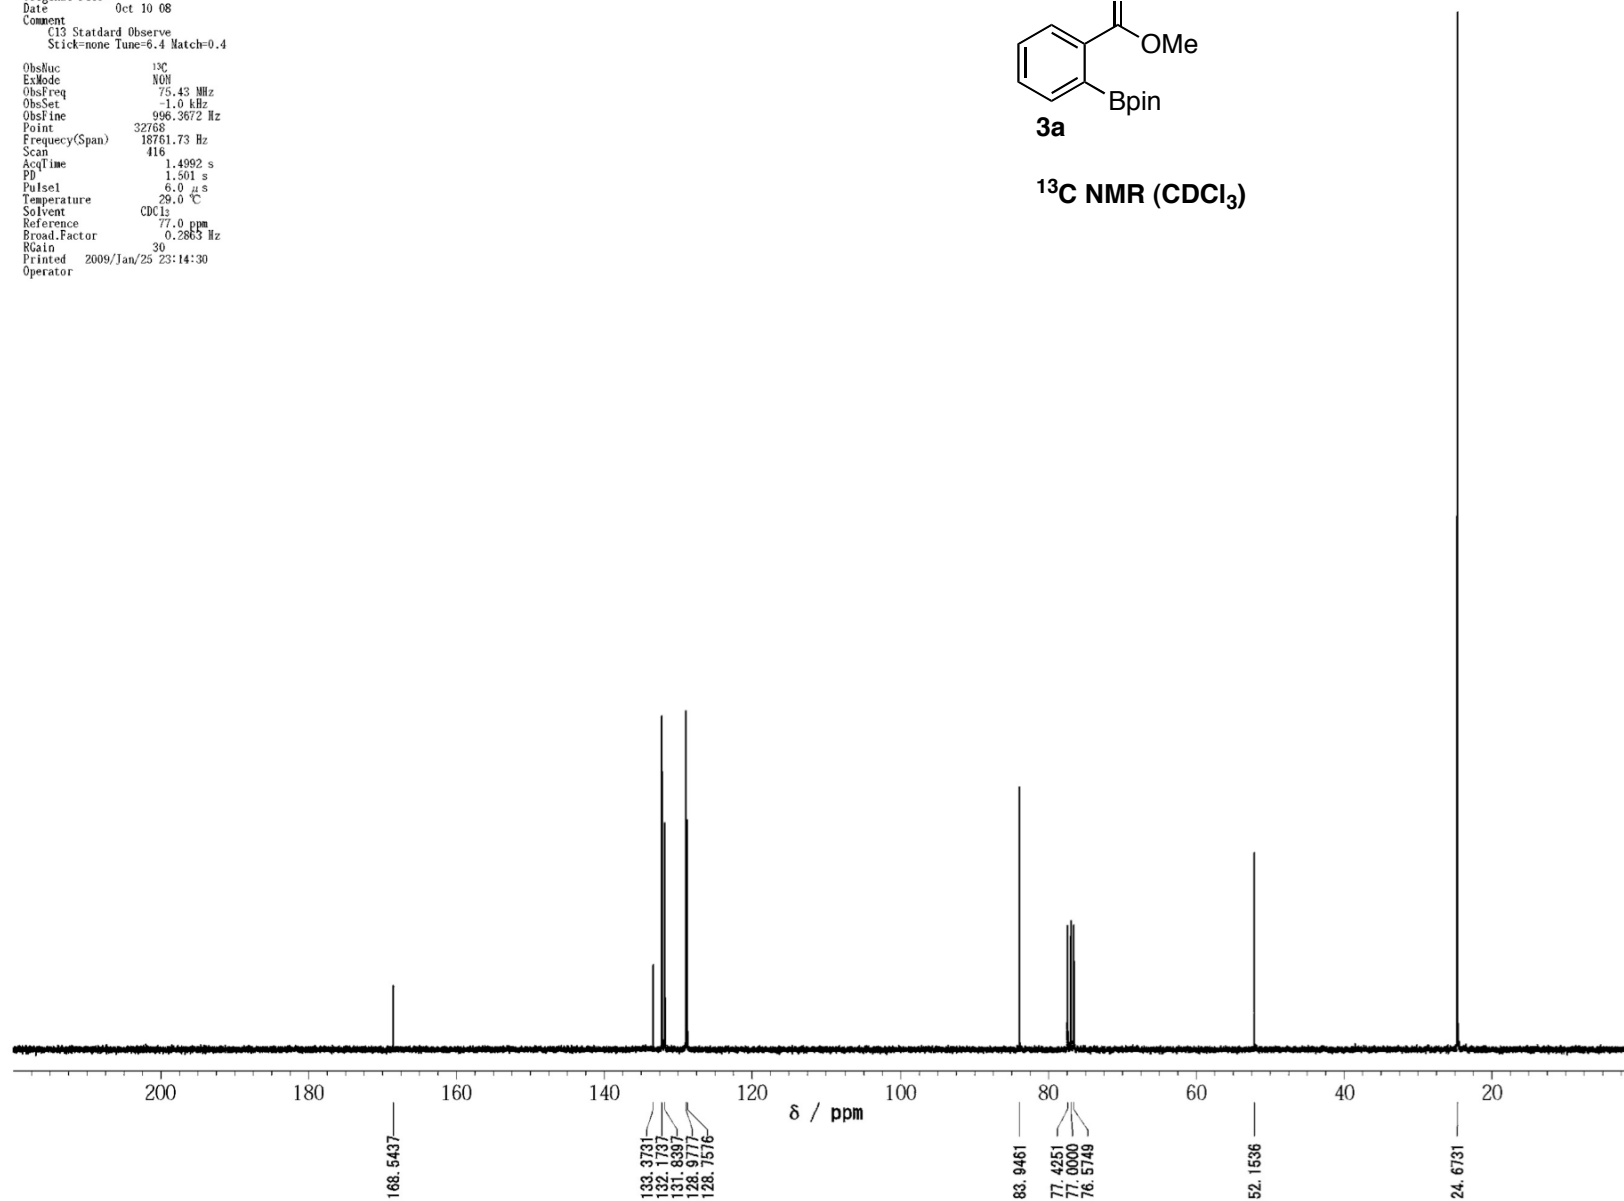

Original File:   
 Date: Oct 10 08   
 Comment: STANDARD 1H OBSERVE   
 ObsNuc: 1H   
 ExMode: NON   
 ObsFreq: 299.96 MHz   
 ObsSet: -1.0 kHz   
 ObsFine: 995.0047 Hz   
 Point: 16384   
 Frequency(Span): 4500.45 Hz   
 Scan: 32   
 AcqTime: 3.4983 s   
 PD: 1.502 s   
 Pulse1: 6.0  $\mu$ s   
 Temperature: 29.0  $^{\circ}$ C   
 Solvent: CDCl<sub>3</sub>   
 Reference: 0.0 ppm   
 Broad.Factor: 0.1373 Hz   
 RGain: 19   
 Printed: 2009/Mar/05 14:57:59   
 Operator:

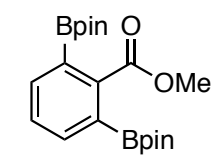

<sup>1</sup>H NMR (CDCl<sub>3</sub>)

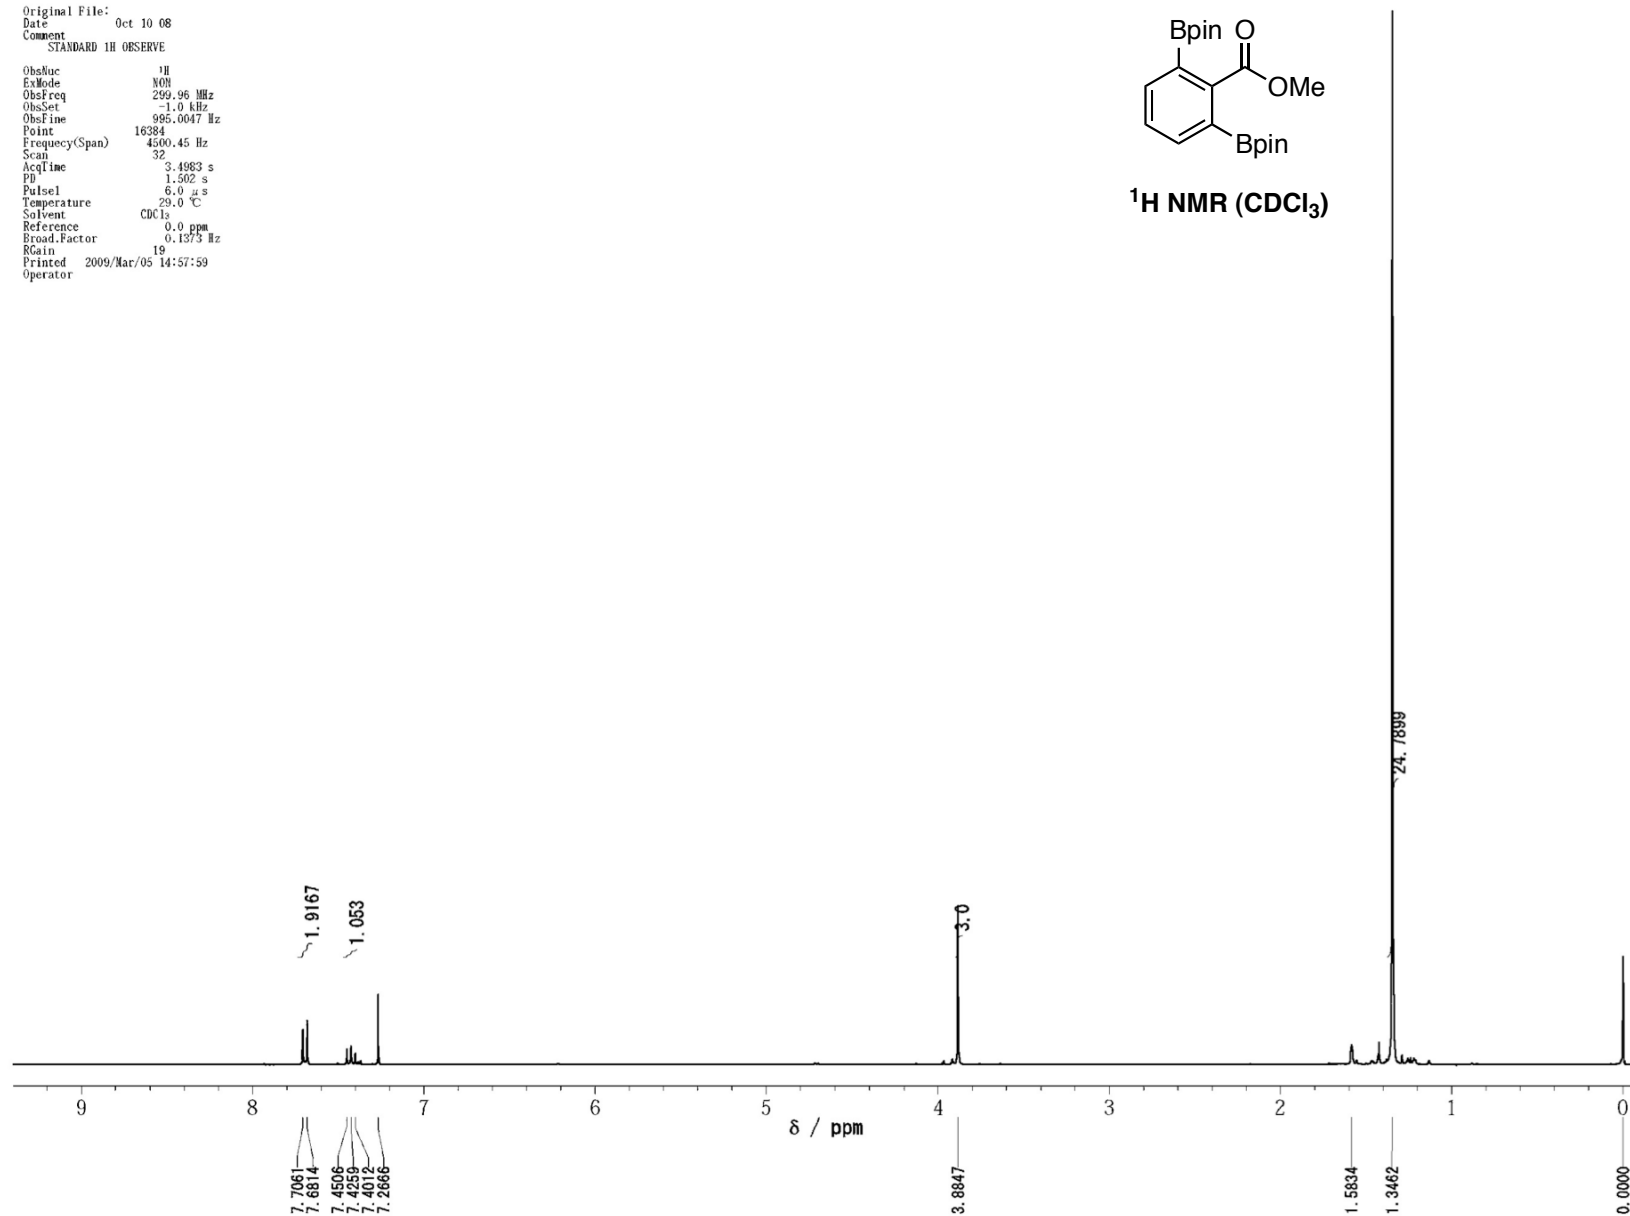

Original File:   
 Date: Oct 3 08   
 Comment: STANDARD 1H OBSERVE   
 ObsNuc: 1H   
 ExMode: NON   
 ObsFreq: 299.96 MHz   
 ObsSet: -1.0 kHz   
 ObsFine: 995.0047 Hz   
 Point: 16384   
 Frequency(Span): 4500.45 Hz   
 Scan: 16   
 AcqTime: 3.4983 s   
 PD: 1.502 s   
 Pulse1: 6.0  $\mu$ s   
 Temperature: 29.0  $^{\circ}$ C   
 Solvent: CDCl<sub>3</sub>   
 Reference: 0.0 ppm   
 Broad.Factor: 0.1373 Hz   
 RGain: 30   
 Printed: 2009/Jan/25 23:16:09   
 Operator:

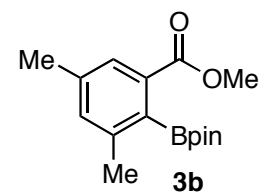

<sup>1</sup>H NMR (CDCl<sub>3</sub>)

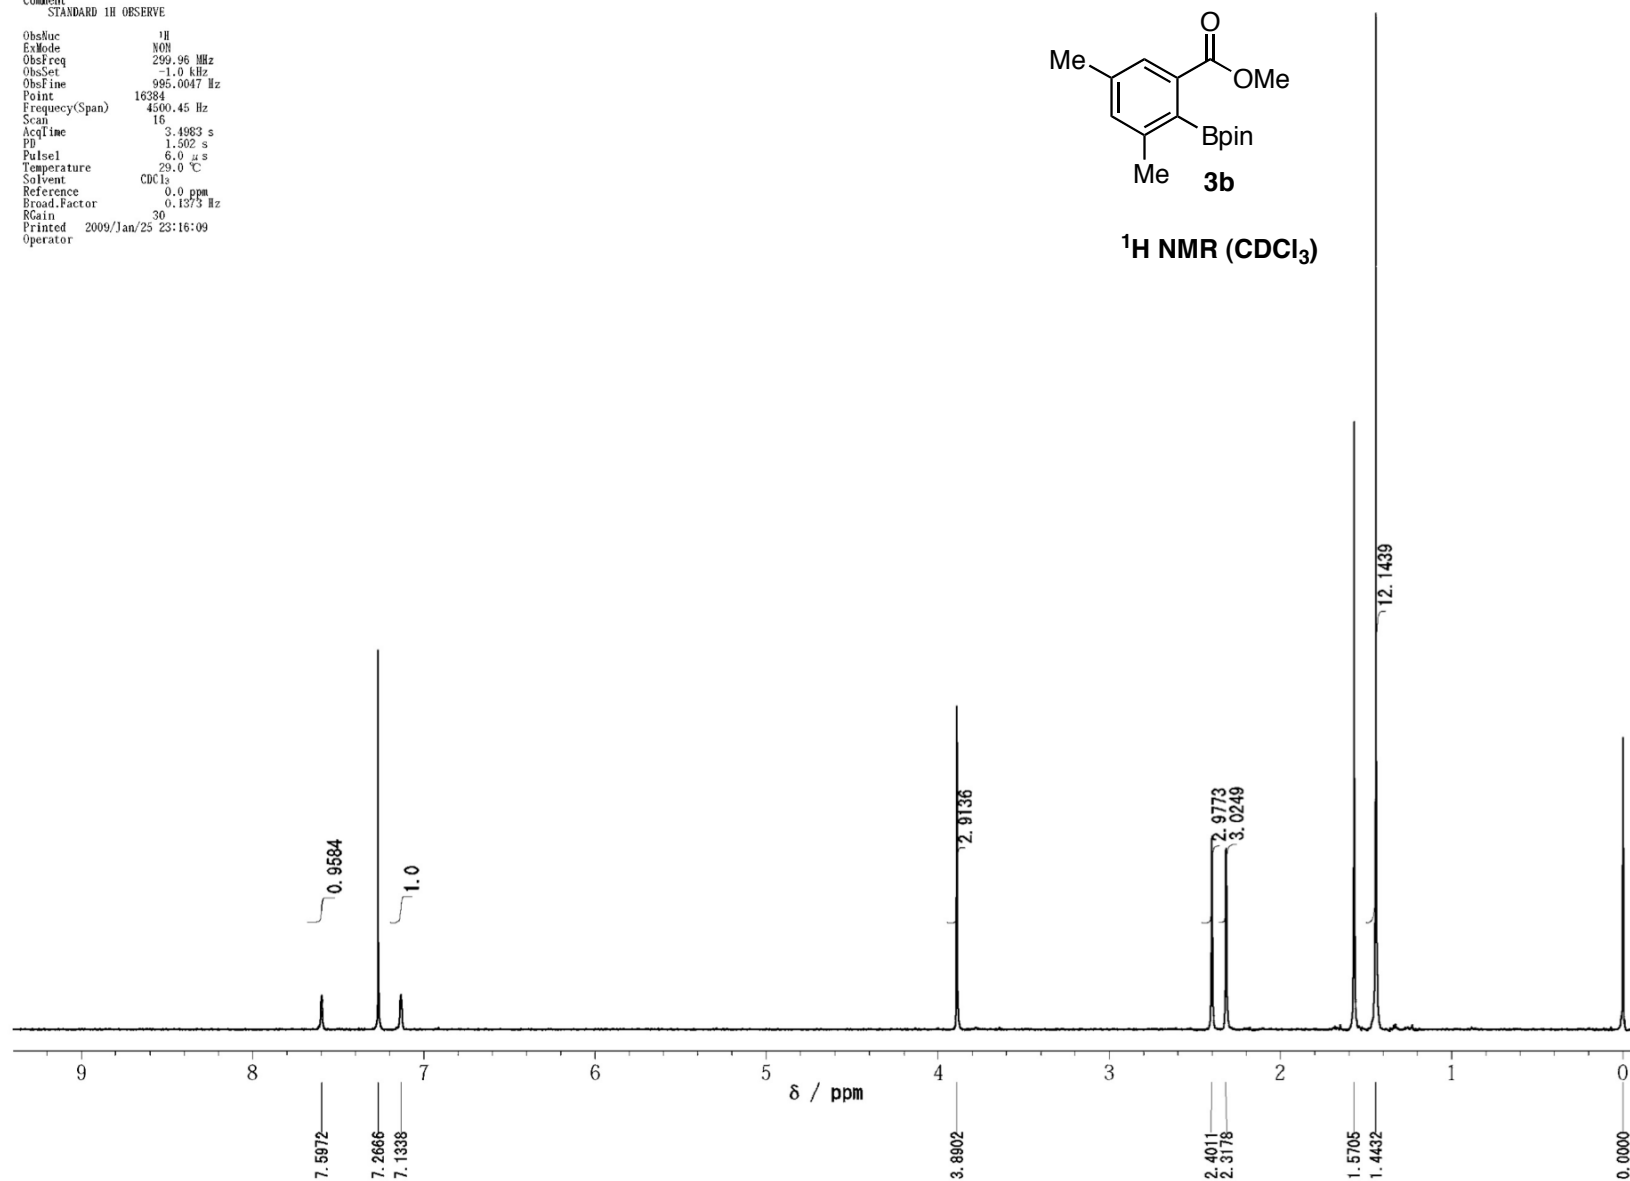

Original File: Oct 3 08  
 Date: Oct 3 08  
 Comment: C13 Standard Observe  
 Stick=none Tune=6.4 Match=0.4  
 ObsNuc: <sup>13</sup>C  
 ExMode: NOH  
 ObsFreq: 75.43 MHz  
 ObsSet: -1.0 kHz  
 ObsFine: 996.3672 Hz  
 Point: 32768  
 Frequency(Span): 18761.73 Hz  
 Scan: 256  
 AcqTime: 1.4992 s  
 PD: 1.501 s  
 Pulse1: 6.0 μs  
 Temperature: 29.0 °C  
 Solvent: CDCl<sub>3</sub>  
 Reference: 77.0 ppm  
 Broad.Factor: 0.2863 Hz  
 RGain: 30  
 Printed: 2009/Jan/25 23:17:00  
 Operator:

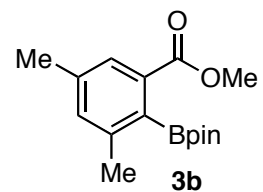

<sup>13</sup>C NMR (CDCl<sub>3</sub>)

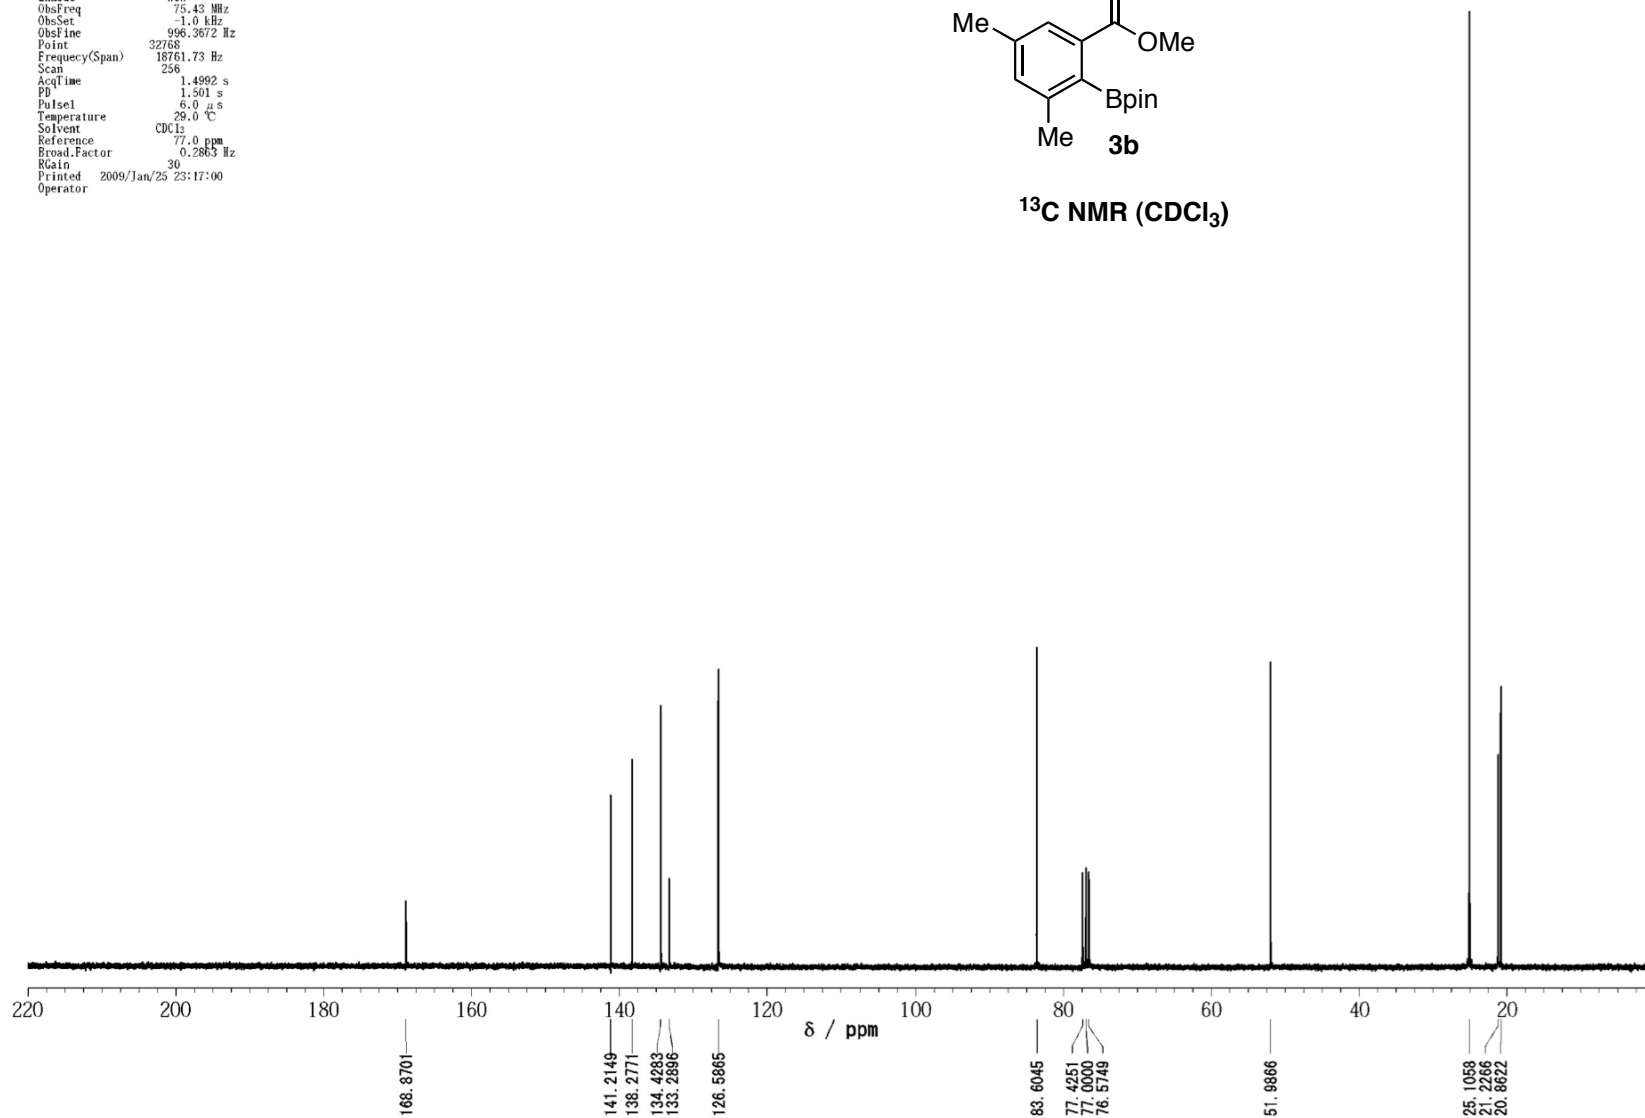

Original File:   
 Date: Oct 4 08   
 Comment: STANDARD 1H OBSERVE   
 ObsNuc: 1H   
 ExMode: NON   
 ObsFreq: 299.96 MHz   
 ObsSet: -1.0 kHz   
 ObsFine: 995.0047 Hz   
 Point: 16384   
 Frequency(Span): 4500.45 Hz   
 Scan: 16   
 AcqTime: 3.4983 s   
 PD: 1.502 s   
 Pulse1: 6.0  $\mu$ s   
 Temperature: 29.0  $^{\circ}$ C   
 Solvent: CDCl<sub>3</sub>   
 Reference: 0.0 ppm   
 Broad.Factor: 0.1373 Hz   
 RGain: 29   
 Printed: 2009/Mar/05 15:01:13   
 Operator:

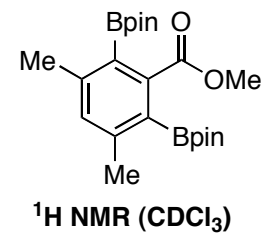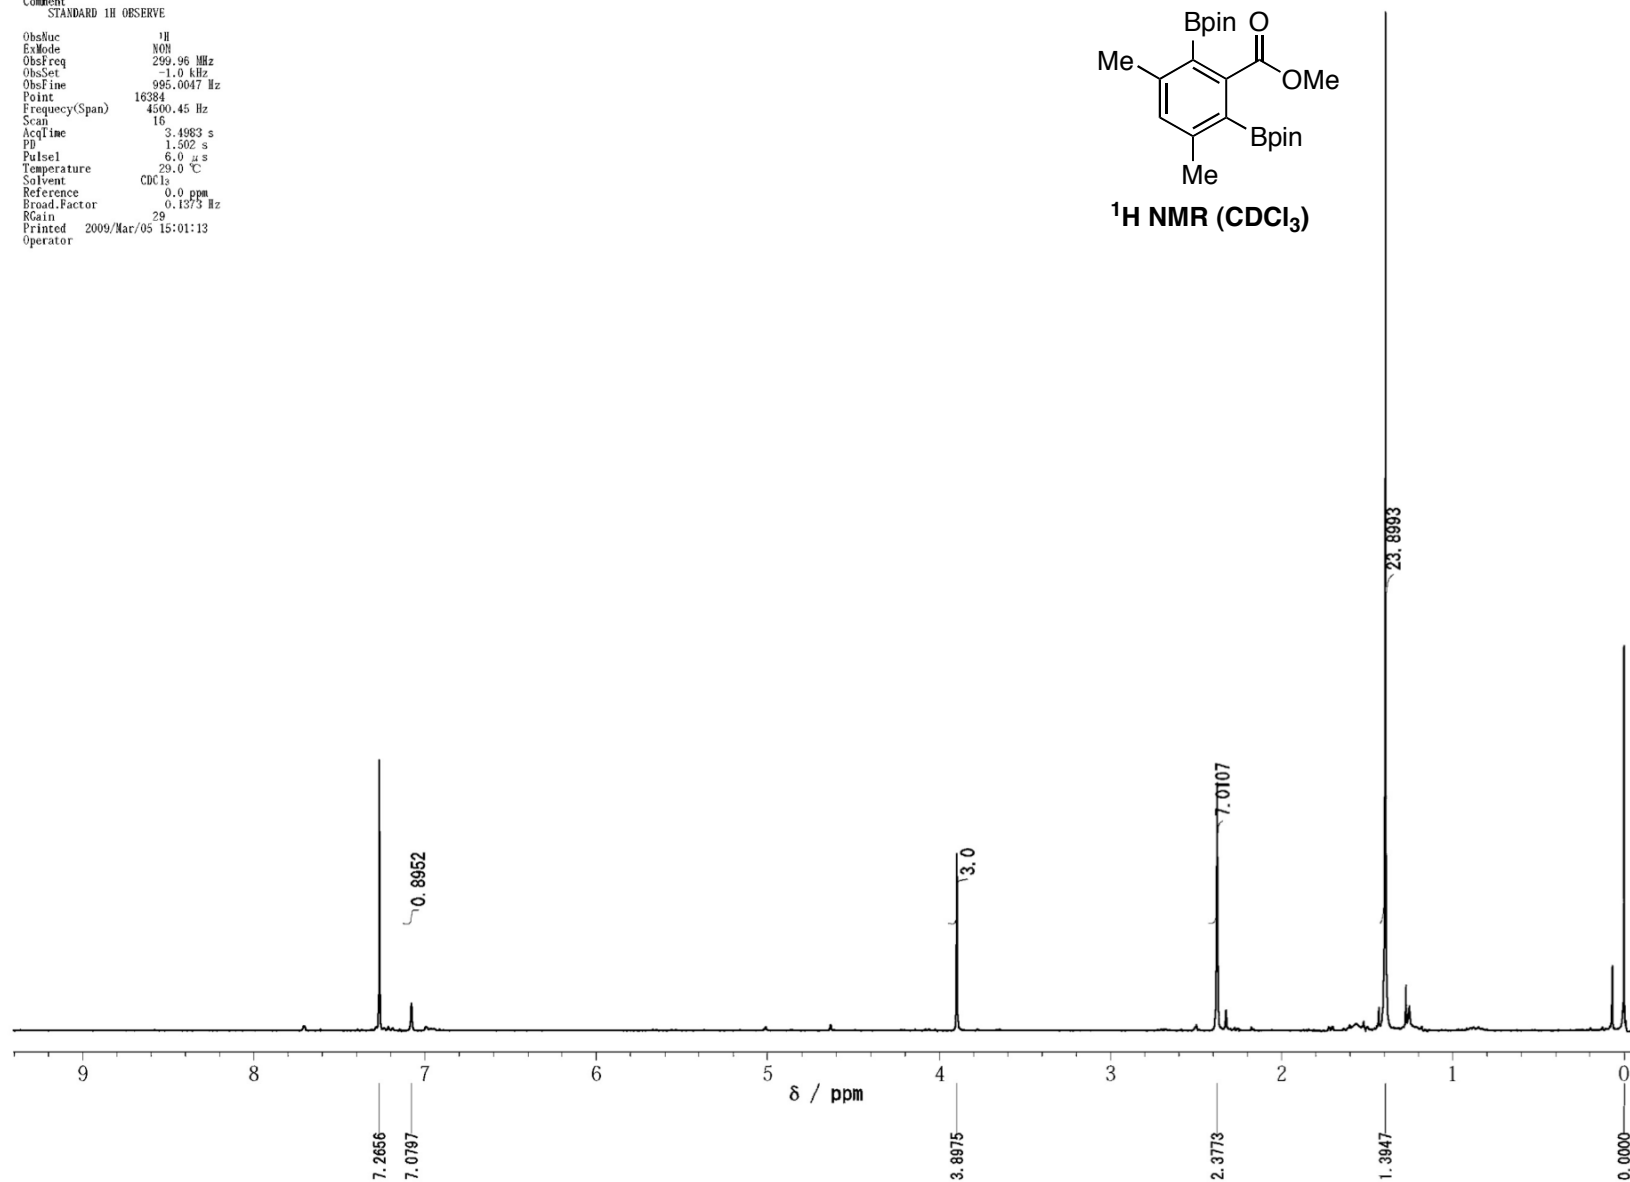



Original File:   
 Date: Nov 22 08   
 Comment: STANDARD 1H OBSERVE   
 ObsNuc: 1H   
 ExMode: NON   
 ObsFreq: 299.96 MHz   
 ObsSet: -1.0 kHz   
 ObsFine: 995.0047 Hz   
 Point: 16384   
 Frequency(Span): 4500.45 Hz   
 Scan: 16   
 AcqTime: 3.4983 s   
 PD: 1.502 s   
 Pulse1: 6.0  $\mu$ s   
 Temperature: 29.0  $^{\circ}$ C   
 Solvent: CDCl<sub>3</sub>   
 Reference: 0.0 ppm   
 Broad.Factor: 0.1373 Hz   
 RGain: 24   
 Printed: 2009/Jan/25 23:17:51   
 Operator:

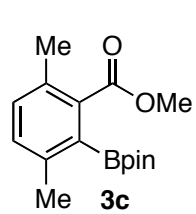

<sup>1</sup>H NMR (CDCl<sub>3</sub>)

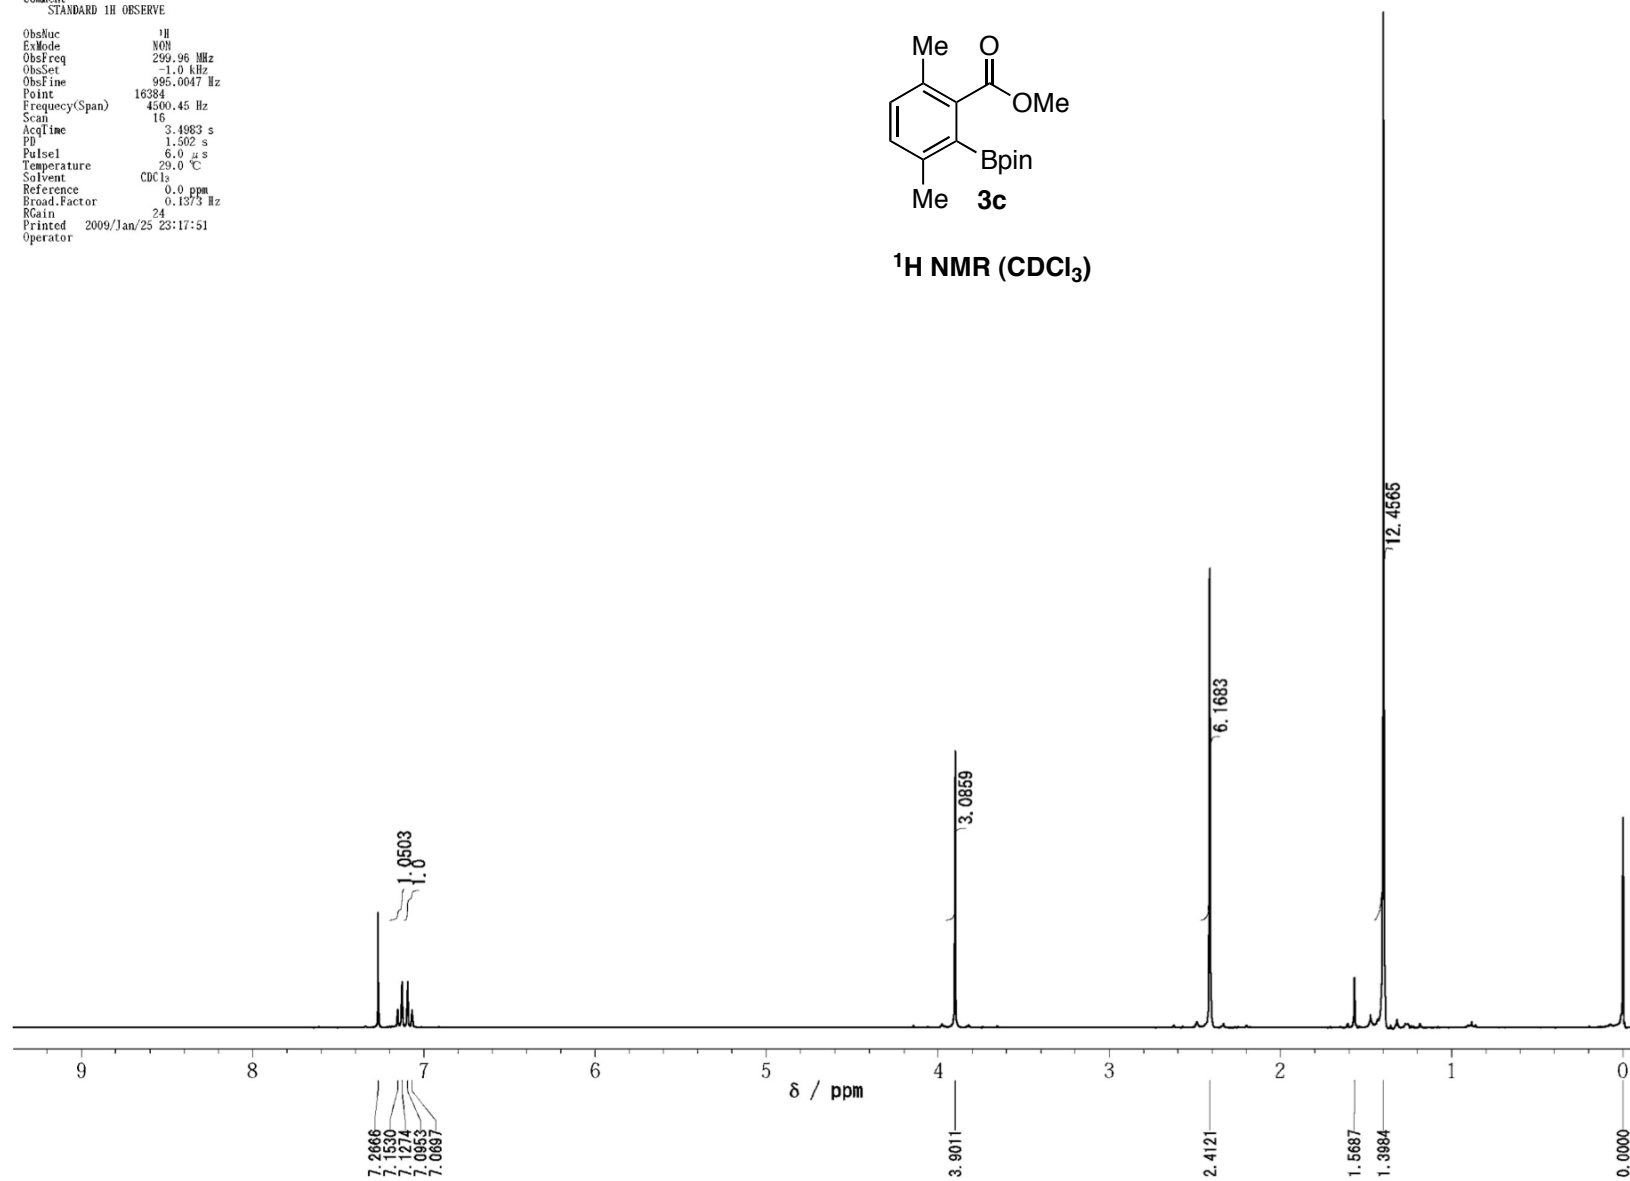

Original File:  
 Date Nov 22 08  
 Comment C13 Standard Observe  
 Stick-none Tune=6.4 Match=0.4  
 ObsNuc <sup>13</sup>C  
 ExMode NOH  
 ObsFreq 75.43 MHz  
 ObsSet -1.0 kHz  
 ObsFine 996.3672 Hz  
 Point 32768  
 Frequency(Span) 18761.73 Hz  
 Scan 496  
 AcqTime 1.4992 s  
 PD 1.501 s  
 Pulse1 6.0 μs  
 Temperature 29.0 °C  
 Solvent CDCl<sub>3</sub>  
 Reference 77.0 ppm  
 Broad.Factor 0.2863 Hz  
 RGain 30  
 Printed 2009/Jan/25 23:18:40  
 Operator

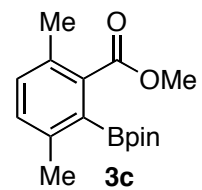

<sup>13</sup>C NMR (CDCl<sub>3</sub>)

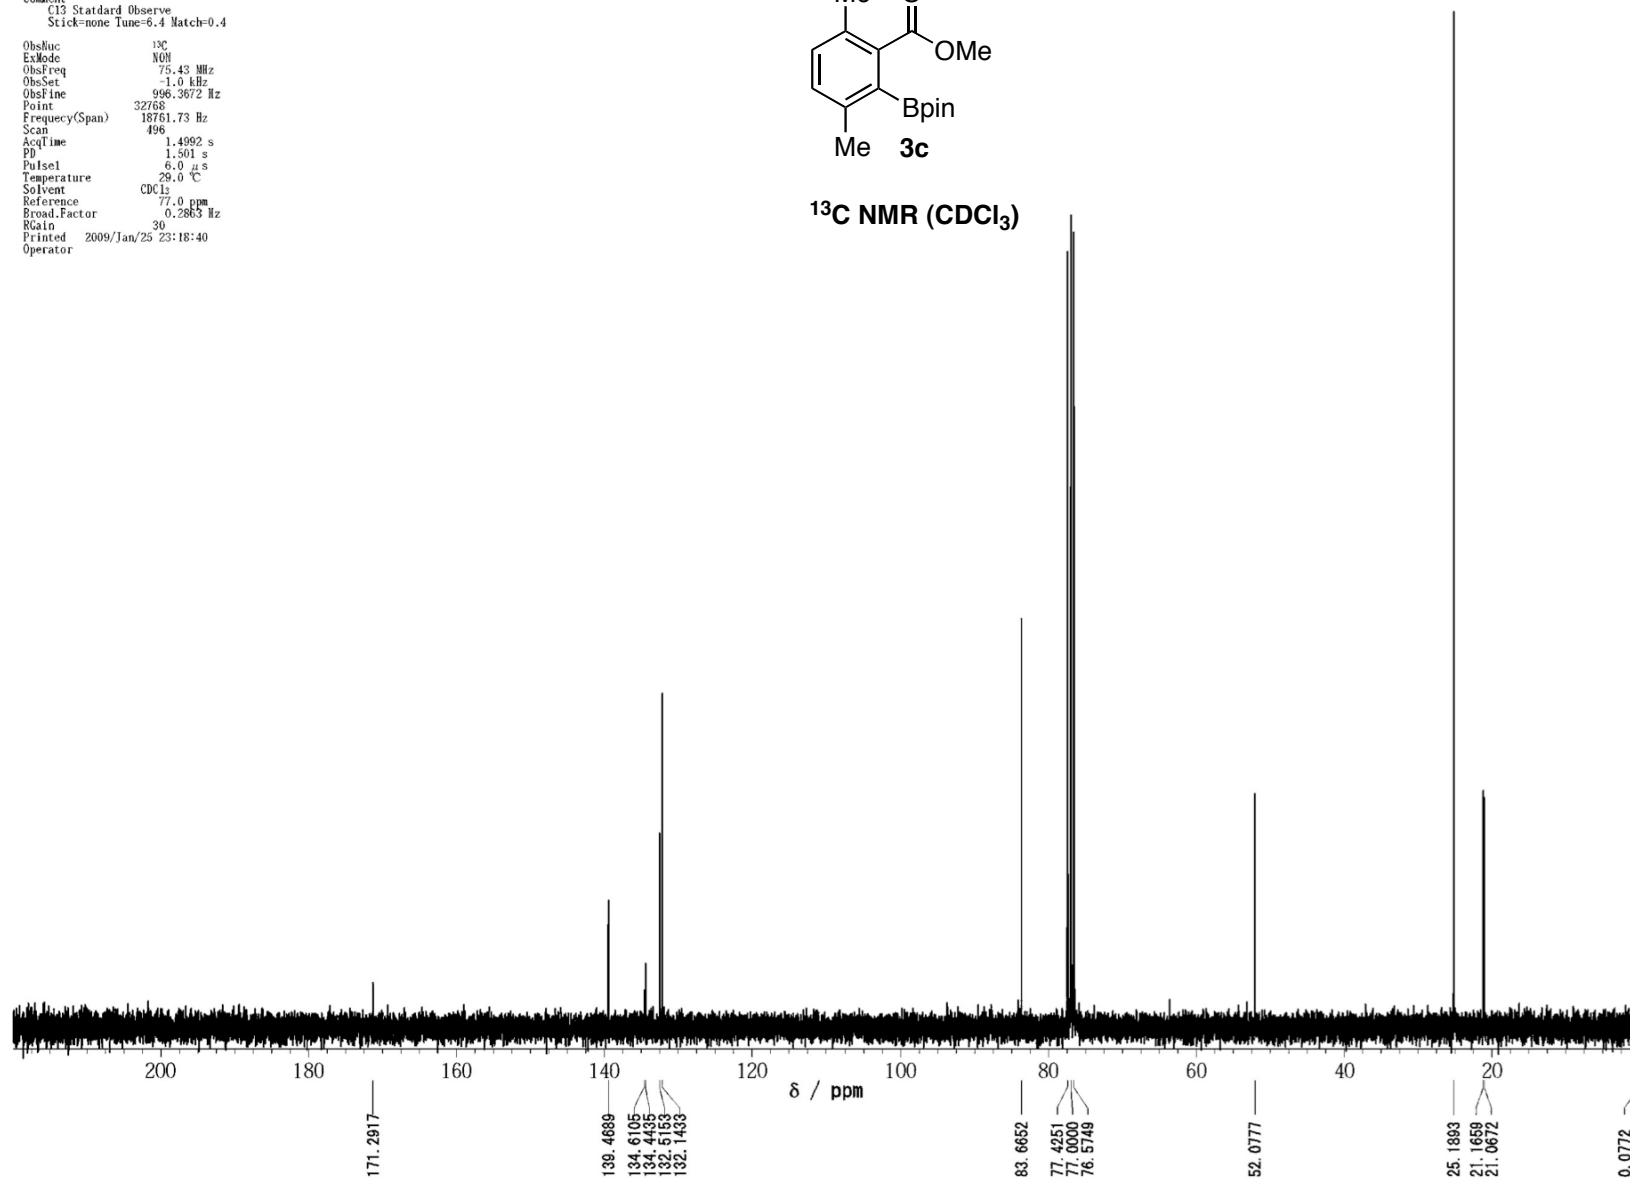

Original File:  
 Date Dec 17 08  
 Comment STANDARD 1H OBSERVE  
 ObsNuc 1H  
 ExMode NON  
 ObsFreq 299.96 MHz  
 ObsSet -1.0 kHz  
 ObsFine 995.0047 Hz  
 Point 16384  
 Frequency(Span) 4500.45 Hz  
 Scan 32  
 AcqTime 3.4983 s  
 PD 1.502 s  
 Pulse1 6.0  $\mu$ s  
 Temperature 29.0  $^{\circ}$ C  
 Solvent CDCl<sub>3</sub>  
 Reference 0.0 ppm  
 Broad.Factor 0.1373 Hz  
 RGain 20  
 Printed 2009/Jan/25 23:19:43  
 Operator

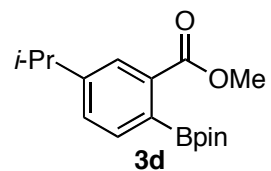

<sup>1</sup>H NMR (CDCl<sub>3</sub>)

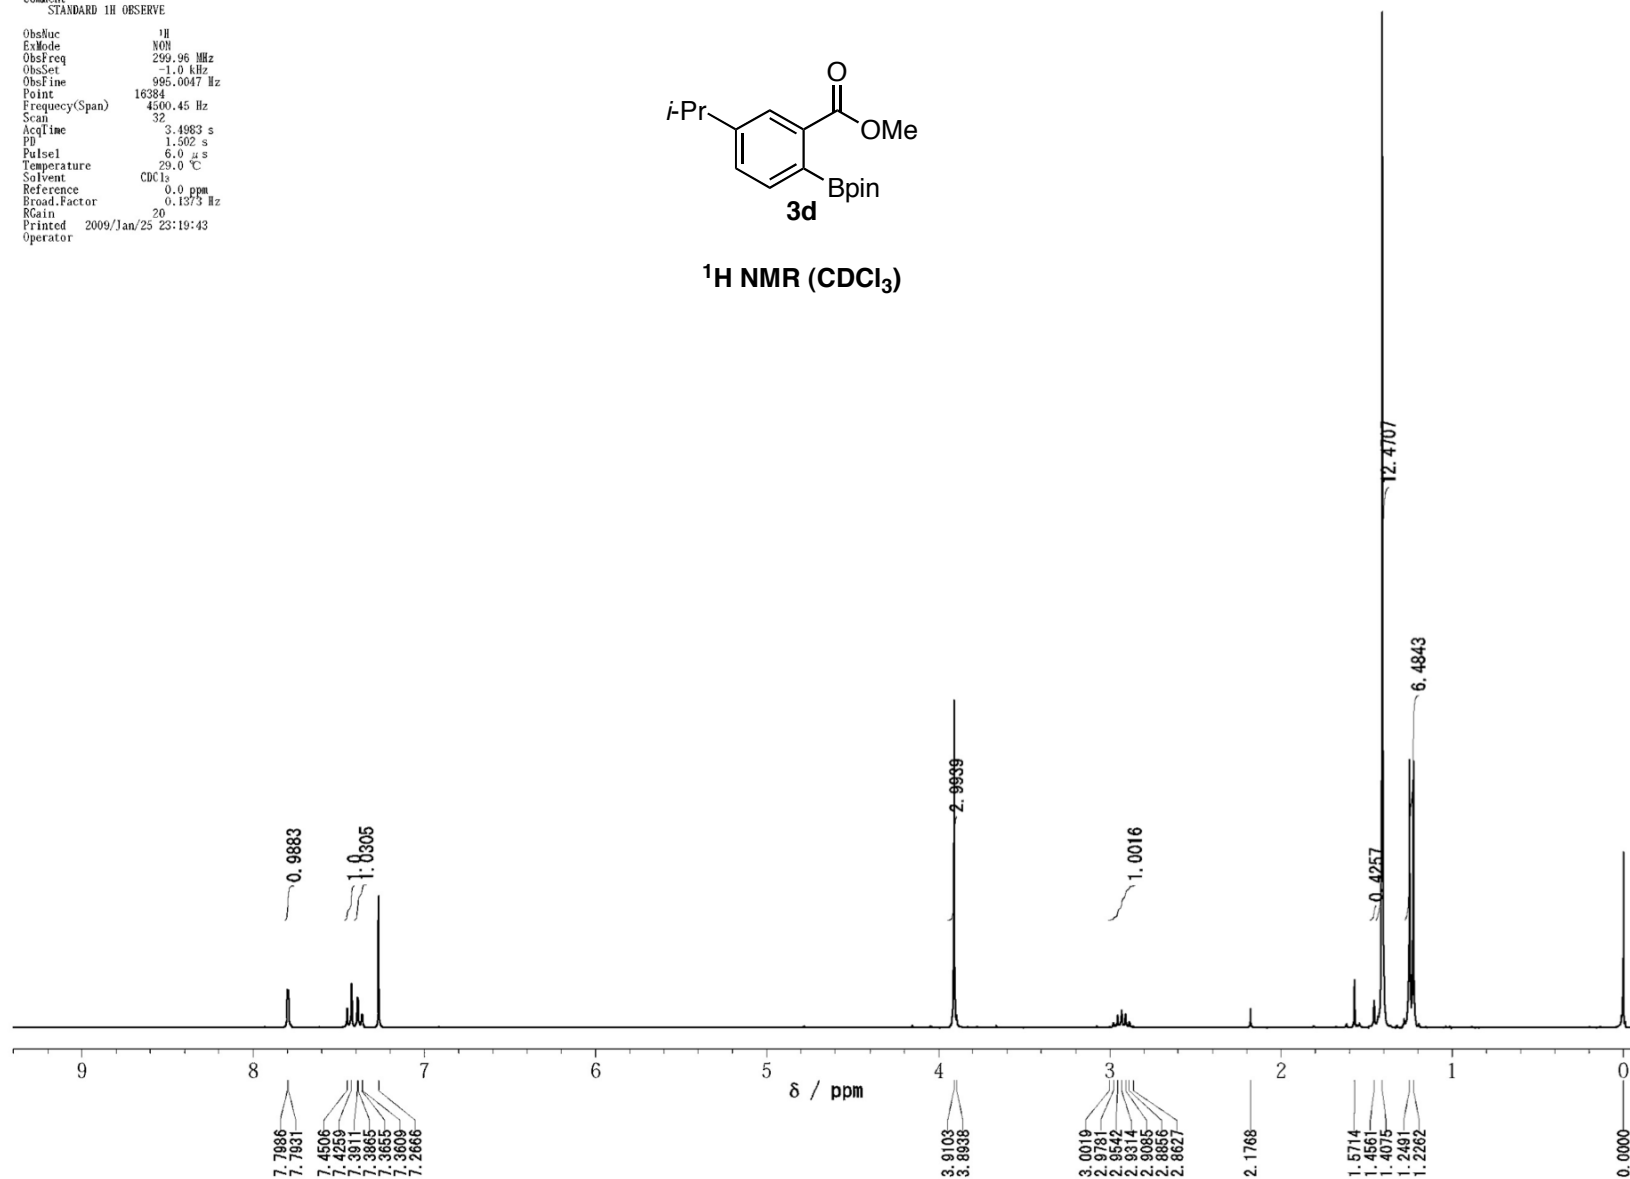

Original File:  
 Date Dec 17 08  
 Comment C13 Standard Observe  
 Stick-none Tune=6.4 Match=0.4  
 ObsNuc <sup>13</sup>C  
 ExMode NOH  
 ObsFreq 75.43 MHz  
 ObsSet -1.0 kHz  
 ObsFine 996.3672 Hz  
 Point 32768  
 Frequency(Span) 18761.73 Hz  
 Scan 416  
 AcqTime 1.4992 s  
 PD 1.501 s  
 Pulse1 6.0 μs  
 Temperature 29.0 °C  
 Solvent CDCl<sub>3</sub>  
 Reference 77.0 ppm  
 Broad.Factor 0.2863 Hz  
 RGain 30  
 Printed 2009/Jan/25 23:20:21  
 Operator

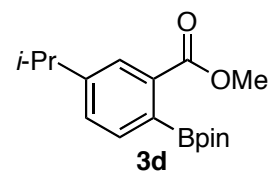

**<sup>13</sup>C NMR (CDCl<sub>3</sub>)**

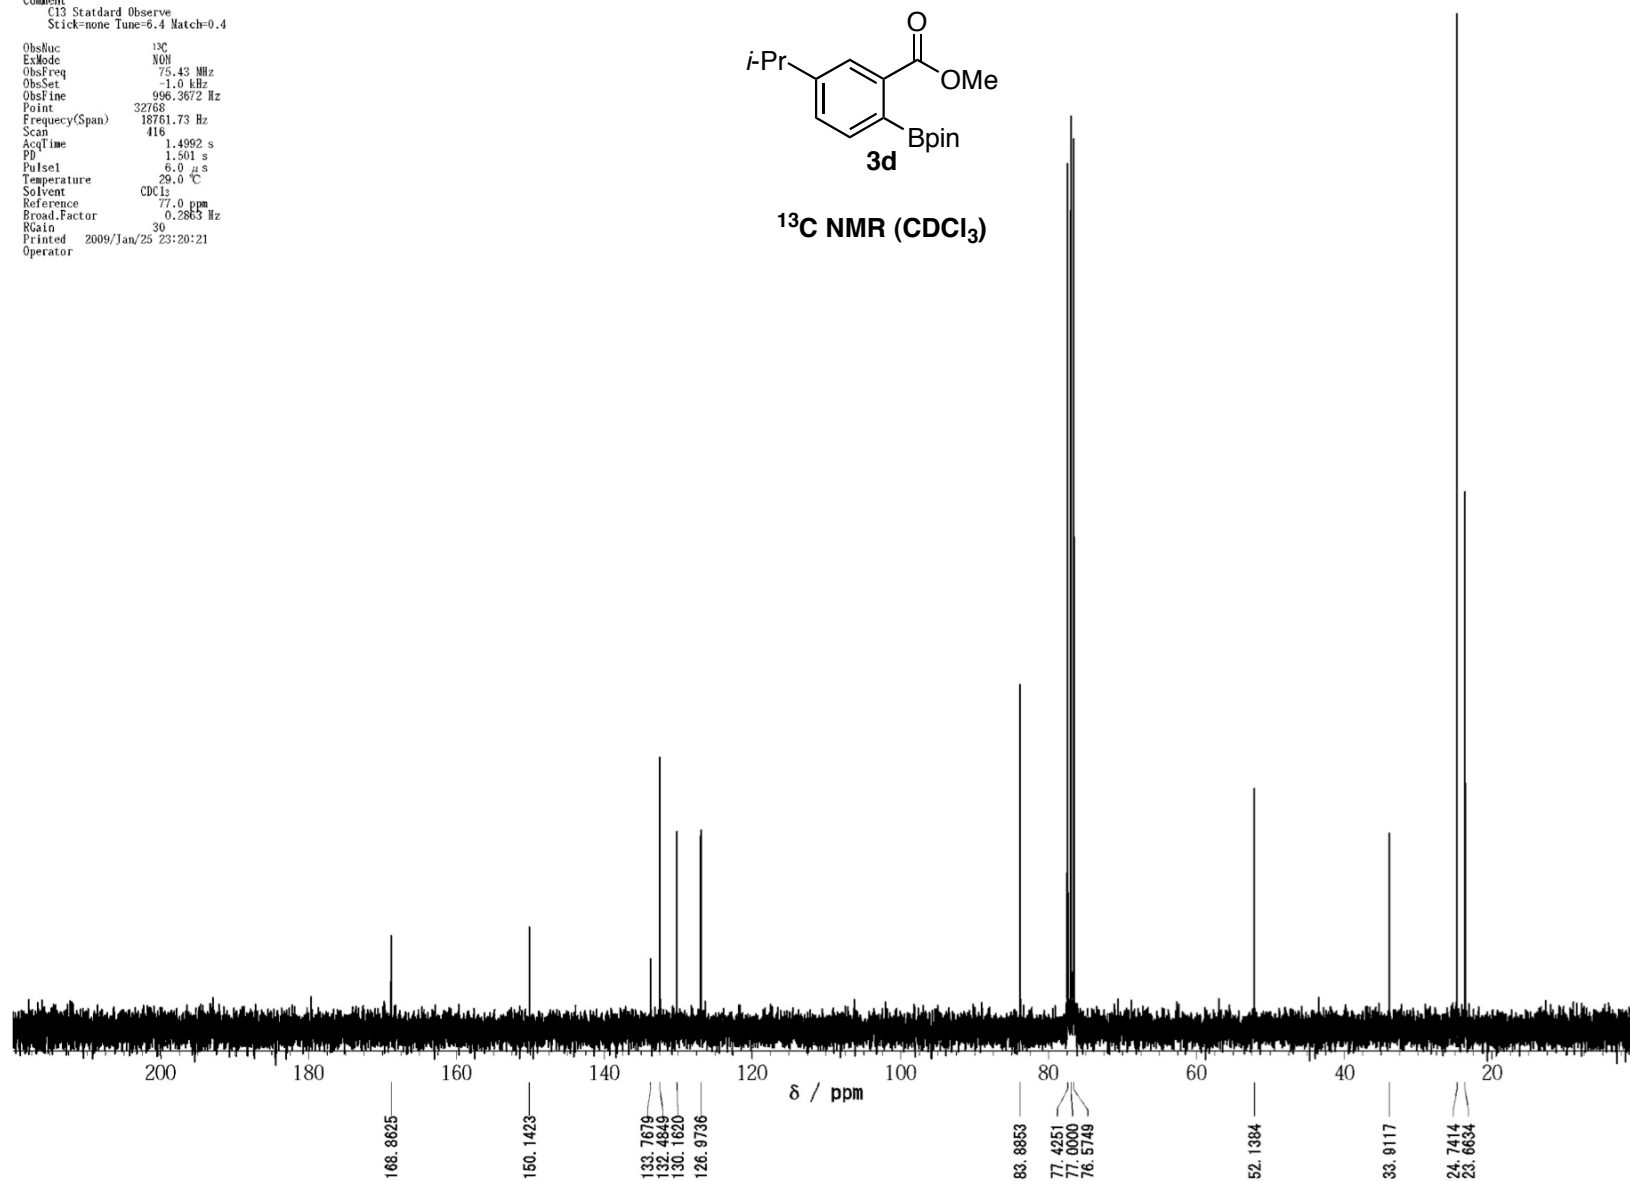

Original File: Oct 12 08  
 Date: Oct 12 08  
 Comment: STANDARD 1H OBSERVE  
 ObsNuc: 1H  
 ExMode: NON  
 ObsFreq: 299.96 MHz  
 ObsSet: -1.0 kHz  
 ObsFine: 995.0047 Hz  
 Point: 16384  
 Frequency(Span): 4500.45 Hz  
 Scan: 16  
 AcqTime: 3.4983 s  
 PD: 1.502 s  
 Pulse1: 6.0  $\mu$ s  
 Temperature: 29.0  $^{\circ}$ C  
 Solvent: CDCl<sub>3</sub>  
 Reference: 0.0 ppm  
 Broad.Factor: 0.1373 Hz  
 RGain: 6  
 Printed: 2009/Jan/25 23:20:56  
 Operator:

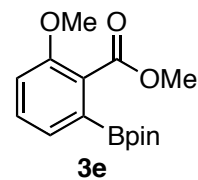

<sup>1</sup>H NMR (CDCl<sub>3</sub>)

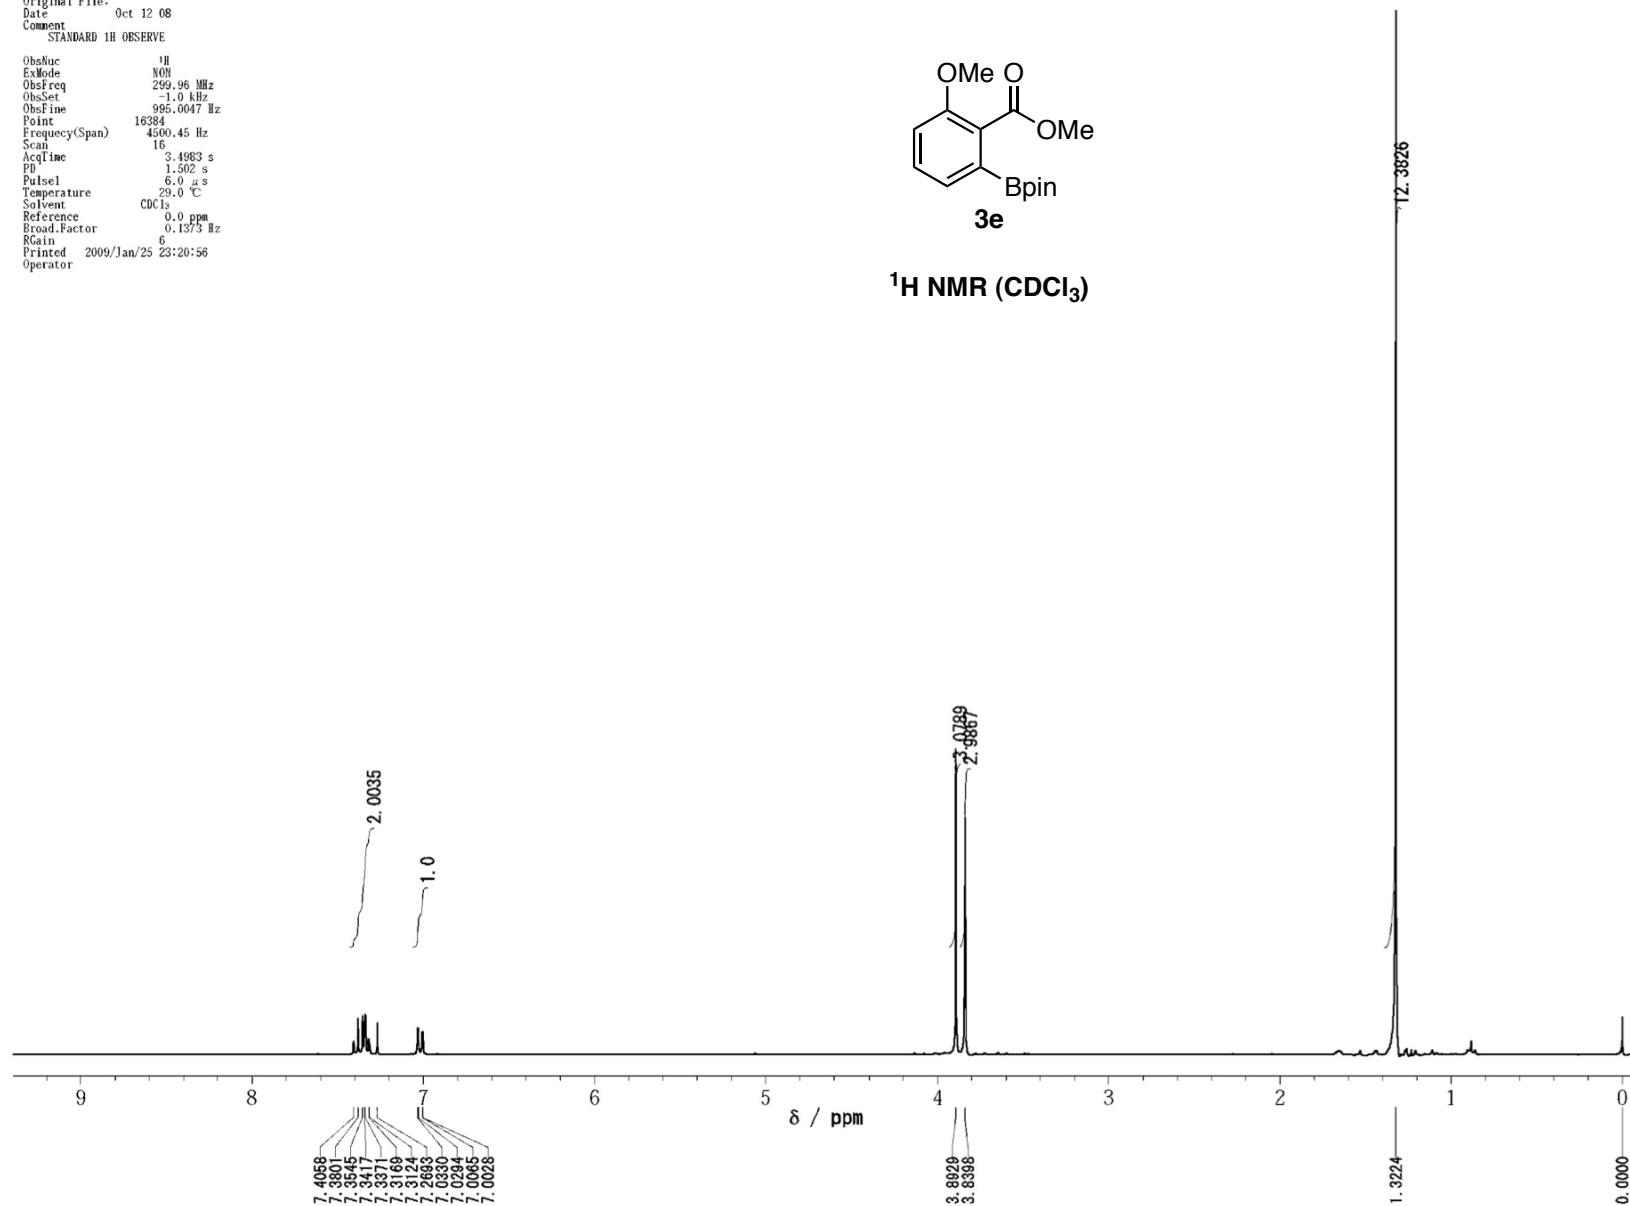

Original File:  
 Date Oct 12 08  
 Comment C13 Standard Observe  
 Stick-none Tune=6.4 Match=0.4  
 ObsNuc <sup>13</sup>C  
 ExMode NOH  
 ObsFreq 75.43 MHz  
 ObsSet -1.0 kHz  
 ObsFine 996.3672 Hz  
 Point 32768  
 Frequency(Span) 18761.73 Hz  
 Scan 656  
 AcqTime 1.4992 s  
 PD 1.501 s  
 Pulse1 6.0  $\mu$ s  
 Temperature 29.0  $^{\circ}$ C  
 Solvent CDCl<sub>3</sub>  
 Reference 77.0 ppm  
 Broad.Factor 0.2863 Hz  
 RGain 30  
 Printed 2009/Jan/25 23:21:45  
 Operator

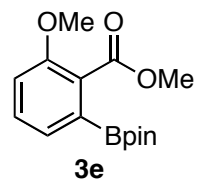

**<sup>13</sup>C NMR (CDCl<sub>3</sub>)**

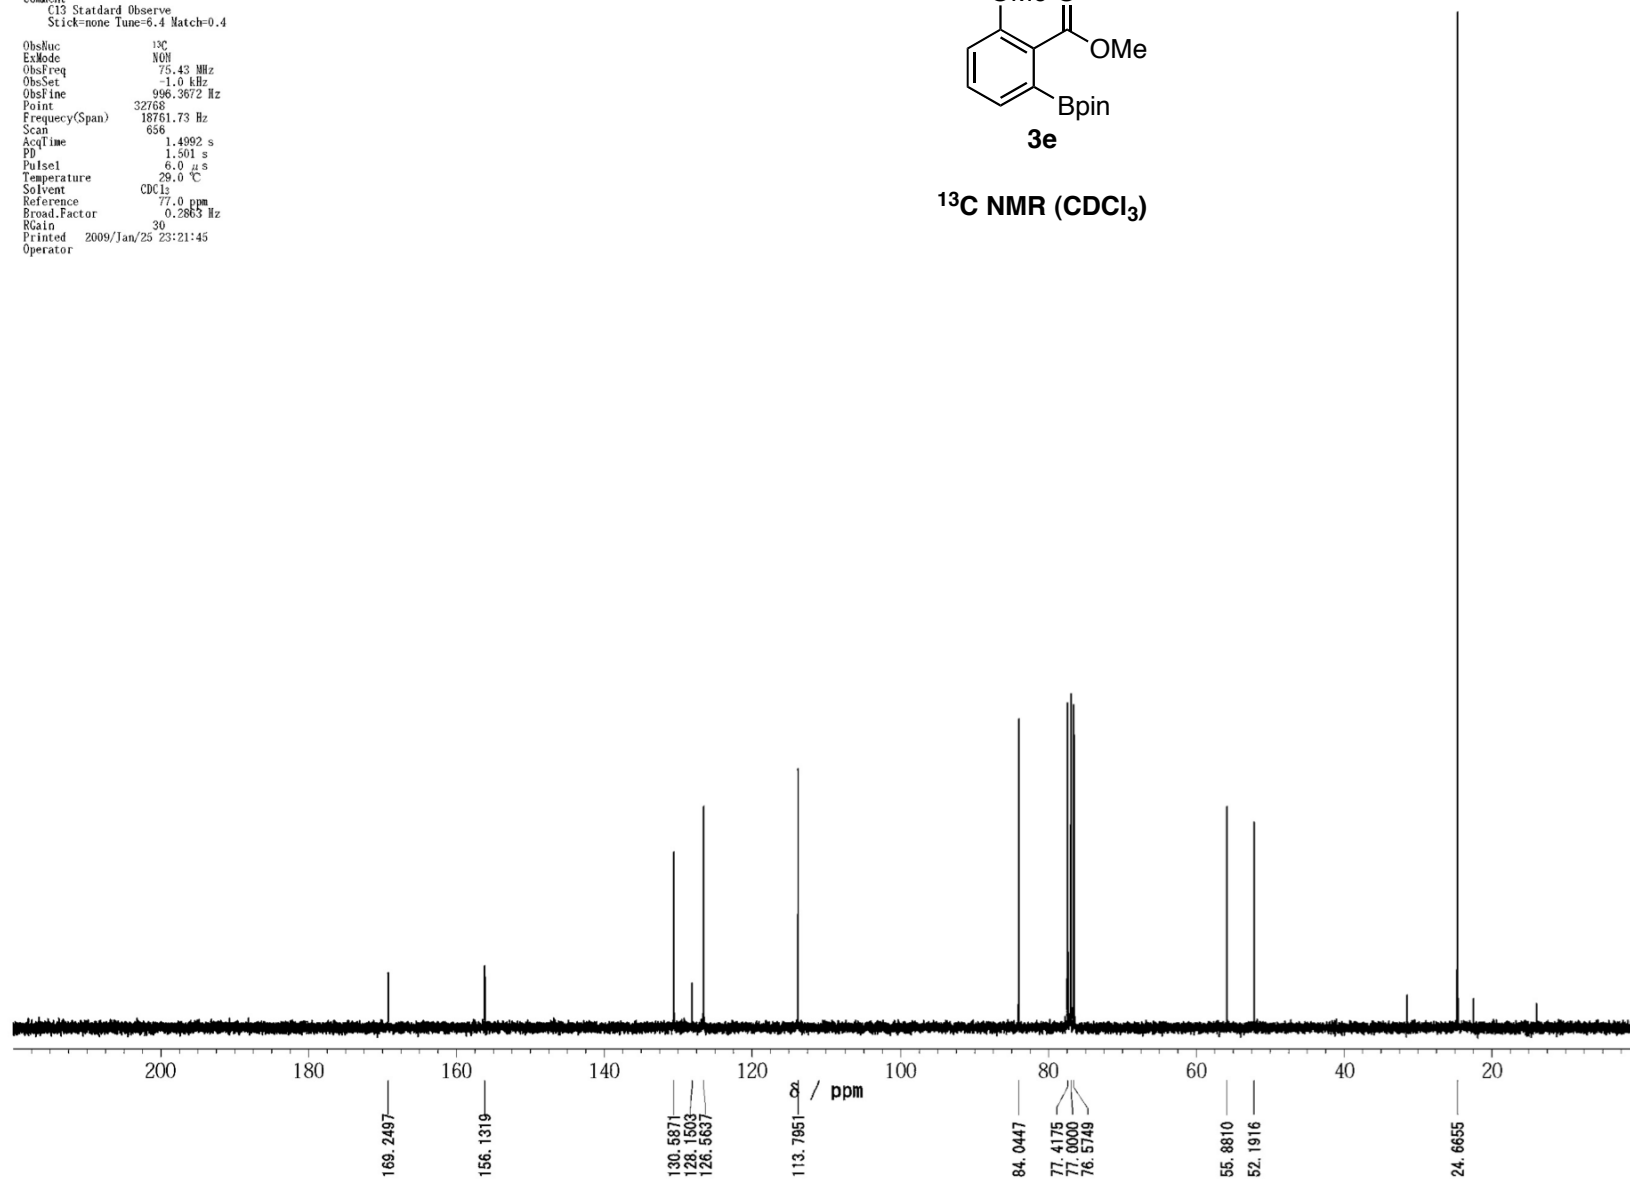

Original File: Dec 19 08  
 Date: Dec 19 08  
 Comment: STANDARD 1H OBSERVE  
 ObsNuc: 1H  
 ExMode: NON  
 ObsFreq: 299.96 MHz  
 ObsSet: -1.0 kHz  
 ObsFine: 995.0047 Hz  
 Point: 16384  
 Frequency(Span): 4500.45 Hz  
 Scan: 16  
 AcqTime: 3.4983 s  
 PD: 1.502 s  
 Pulse1: 6.0  $\mu$ s  
 Temperature: 29.0  $^{\circ}$ C  
 Solvent: CDCl<sub>3</sub>  
 Reference: 0.0 ppm  
 Broad.Factor: 0.1373 Hz  
 RGain: 24  
 Printed: 2009/Jan/25 23:22:30  
 Operator:

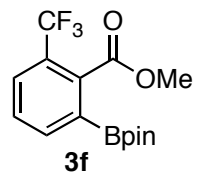

<sup>1</sup>H NMR (CDCl<sub>3</sub>)

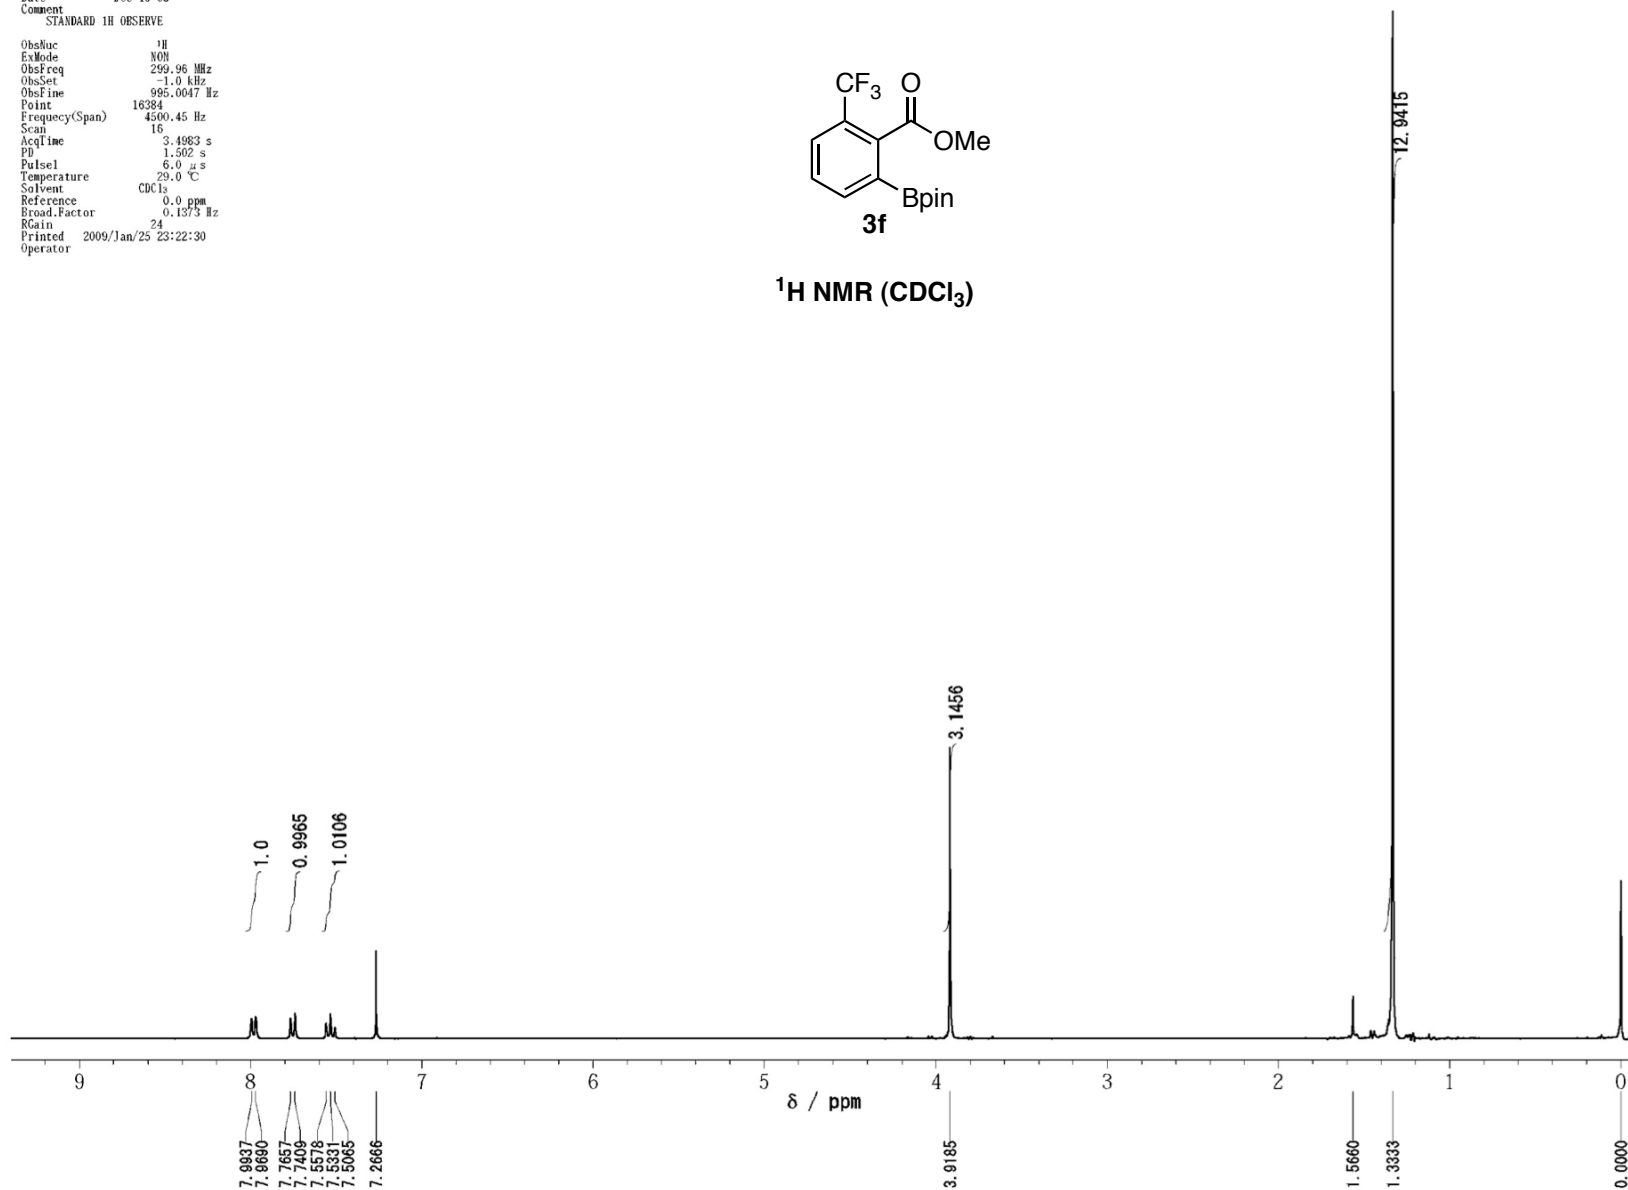

Original File:   
 Date Dec 19 08   
 Comment C13 Standard Observe   
 Stick=none Tune=6.4 Match=0.4   
 ObsNuc <sup>13</sup>C   
 ExMode NOH   
 ObsFreq 75.43 MHz   
 ObsSet -1.0 kHz   
 ObsFine 996.3672 Hz   
 Point 32768   
 Frequency(Span) 18761.73 Hz   
 Scan 288   
 AcqTime 1.4992 s   
 PD 1.501 s   
 Pulse1 6.0 μs   
 Temperature 29.0 °C   
 Solvent CDCl<sub>3</sub>   
 Reference 77.0 ppm   
 Broad.Factor 0.2863 Hz   
 RGain 30   
 Printed 2009/Jan/25 23:23:07   
 Operator

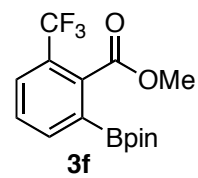

<sup>13</sup>C NMR (CDCl<sub>3</sub>)

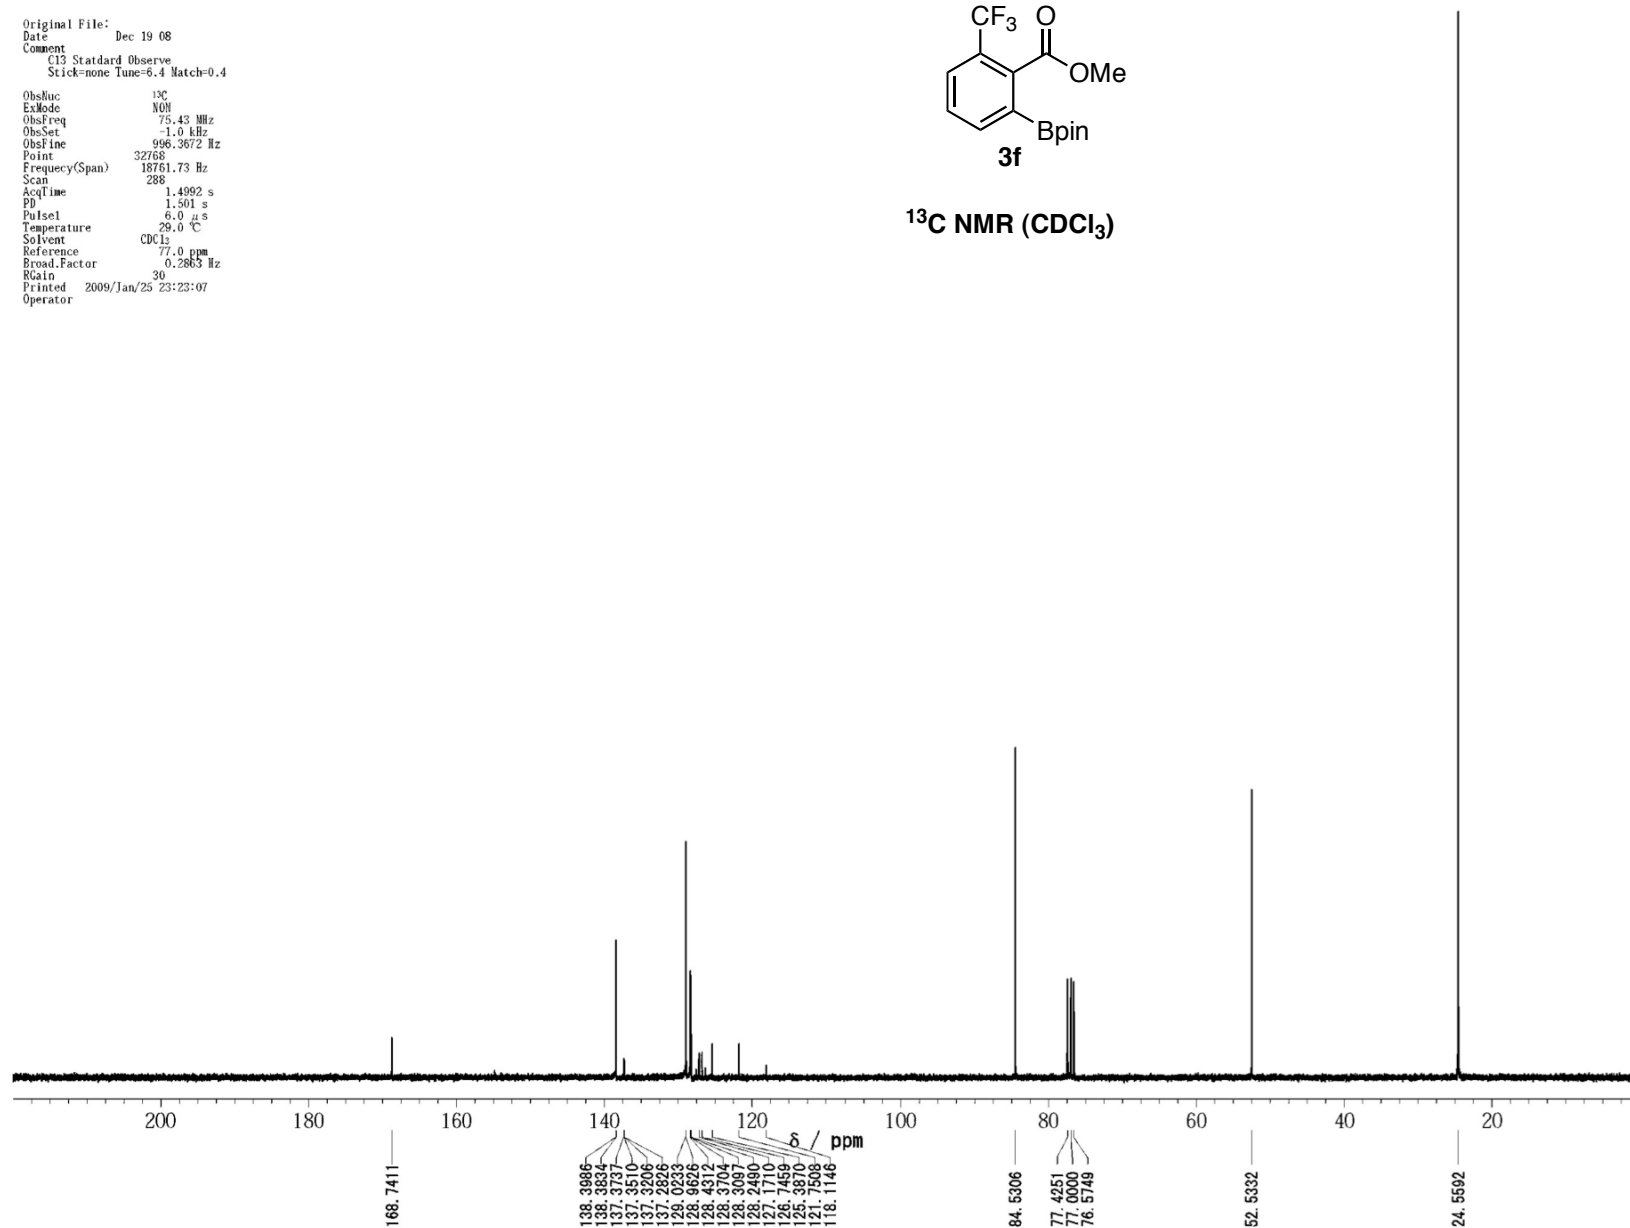



Original File: Dec 6 08  
 Date: Dec 6 08  
 Comment: STANDARD 1H OBSERVE  
 ObsNuc: 1H  
 ExMode: NON  
 ObsFreq: 299.96 MHz  
 ObsSet: -1.0 kHz  
 ObsFine: 995.0047 Hz  
 Point: 16384  
 Frequency(Span): 4500.45 Hz  
 Scan: 16  
 AcqTime: 3.4983 s  
 PD: 1.502 s  
 Pulse1: 1.0  $\mu$ s  
 Temperature: 29.0  $^{\circ}$ C  
 Solvent: CDCl<sub>3</sub>  
 Reference: 0.0 ppm  
 Broad.Factor: 0.1373 Hz  
 RGain: 12  
 Printed: 2009/Jan/25 23:23:44  
 Operator:

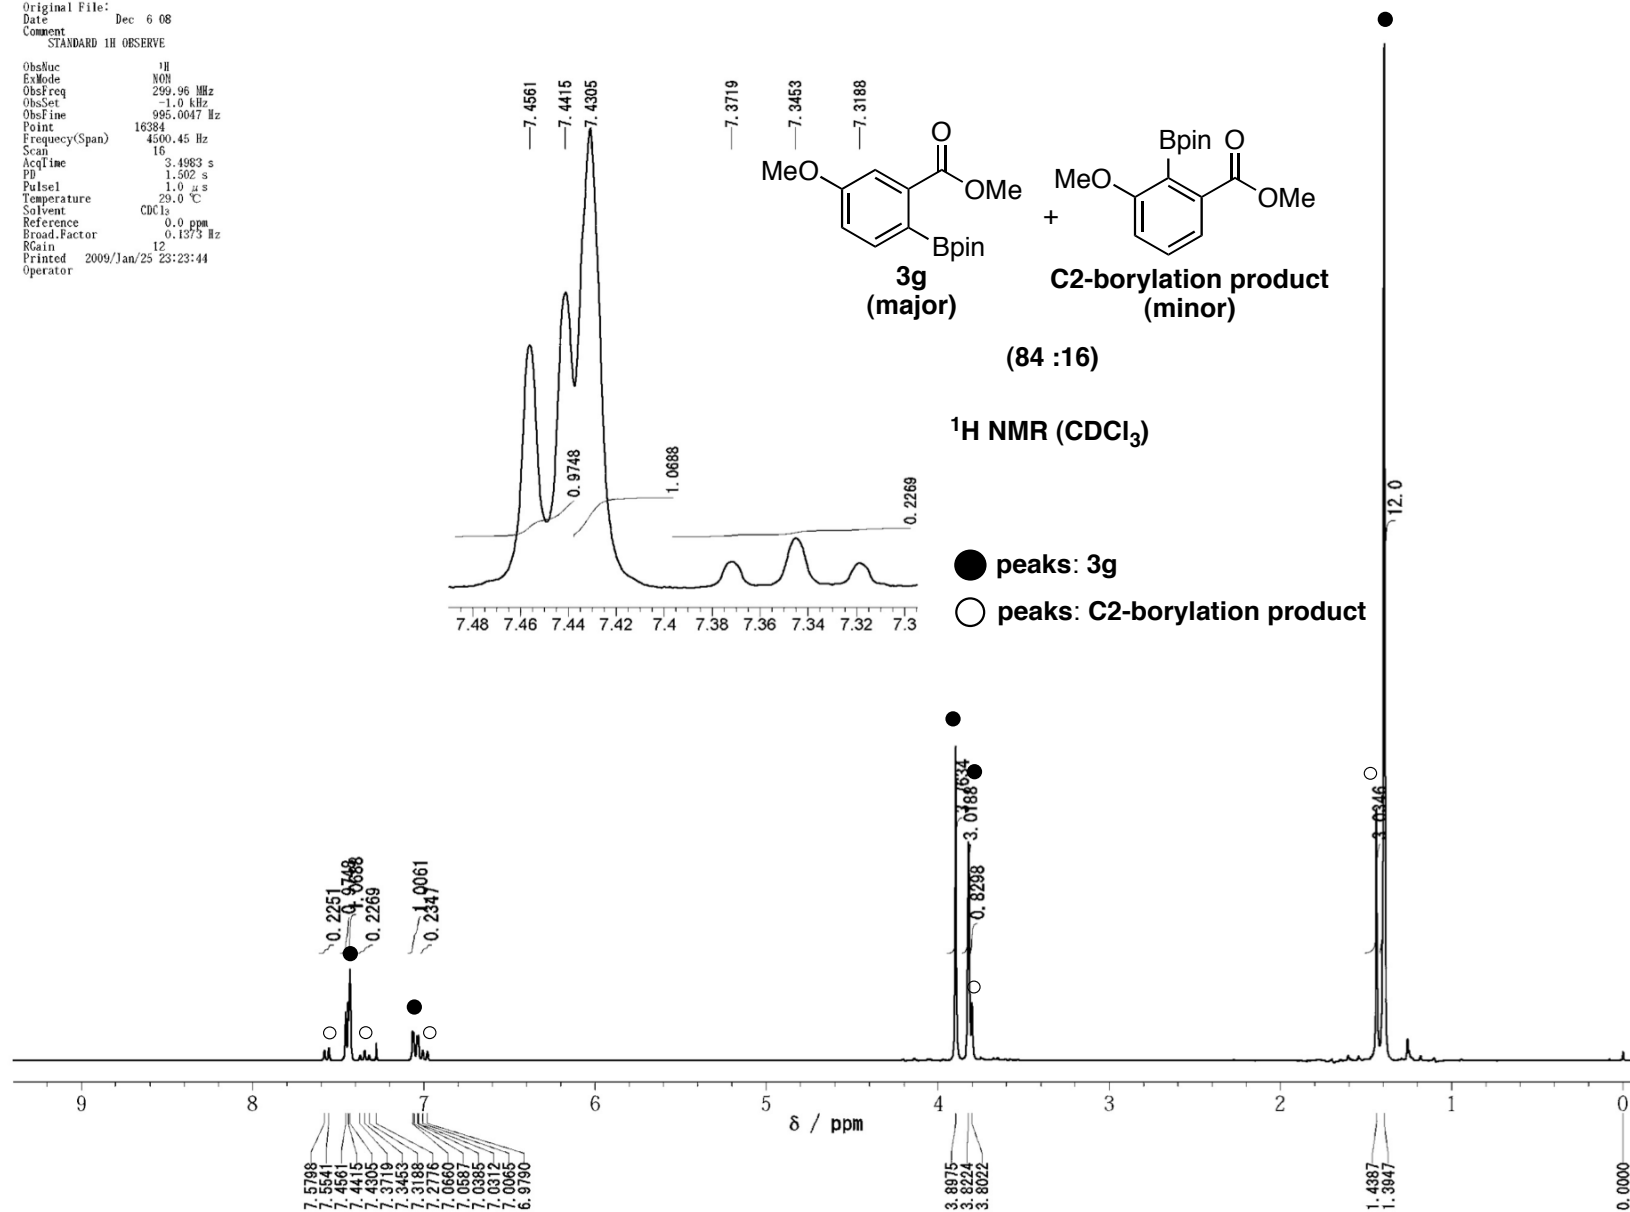

Original File: Dec 6 08  
 Date: Dec 6 08  
 Comment: C13 Standard Observe  
 Stick=none Tune=6.4 Match=0.4  
 ObsNuc: <sup>13</sup>C  
 ExMode: NOH  
 ObsFreq: 75.43 MHz  
 ObsSet: -1.0 kHz  
 ObsFine: 996.3672 Hz  
 Point: 32768  
 Frequency(Span): 18761.73 Hz  
 Scan: 464  
 AcqTime: 1.4992 s  
 PD: 1.501 s  
 Pulse1: 6.0 μs  
 Temperature: 29.0 °C  
 Solvent: CDCl<sub>3</sub>  
 Reference: 77.0 ppm  
 Broad.Factor: 0.2863 Hz  
 RGain: 30  
 Printed: 2009/Jan/25 23:24:22  
 Operator:

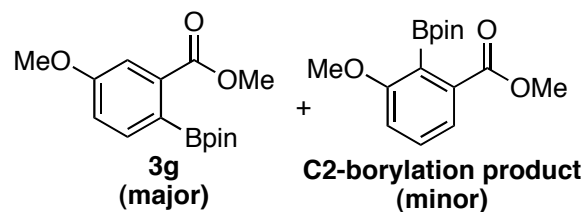

(84 :16)

<sup>13</sup>C NMR (CDCl<sub>3</sub>)

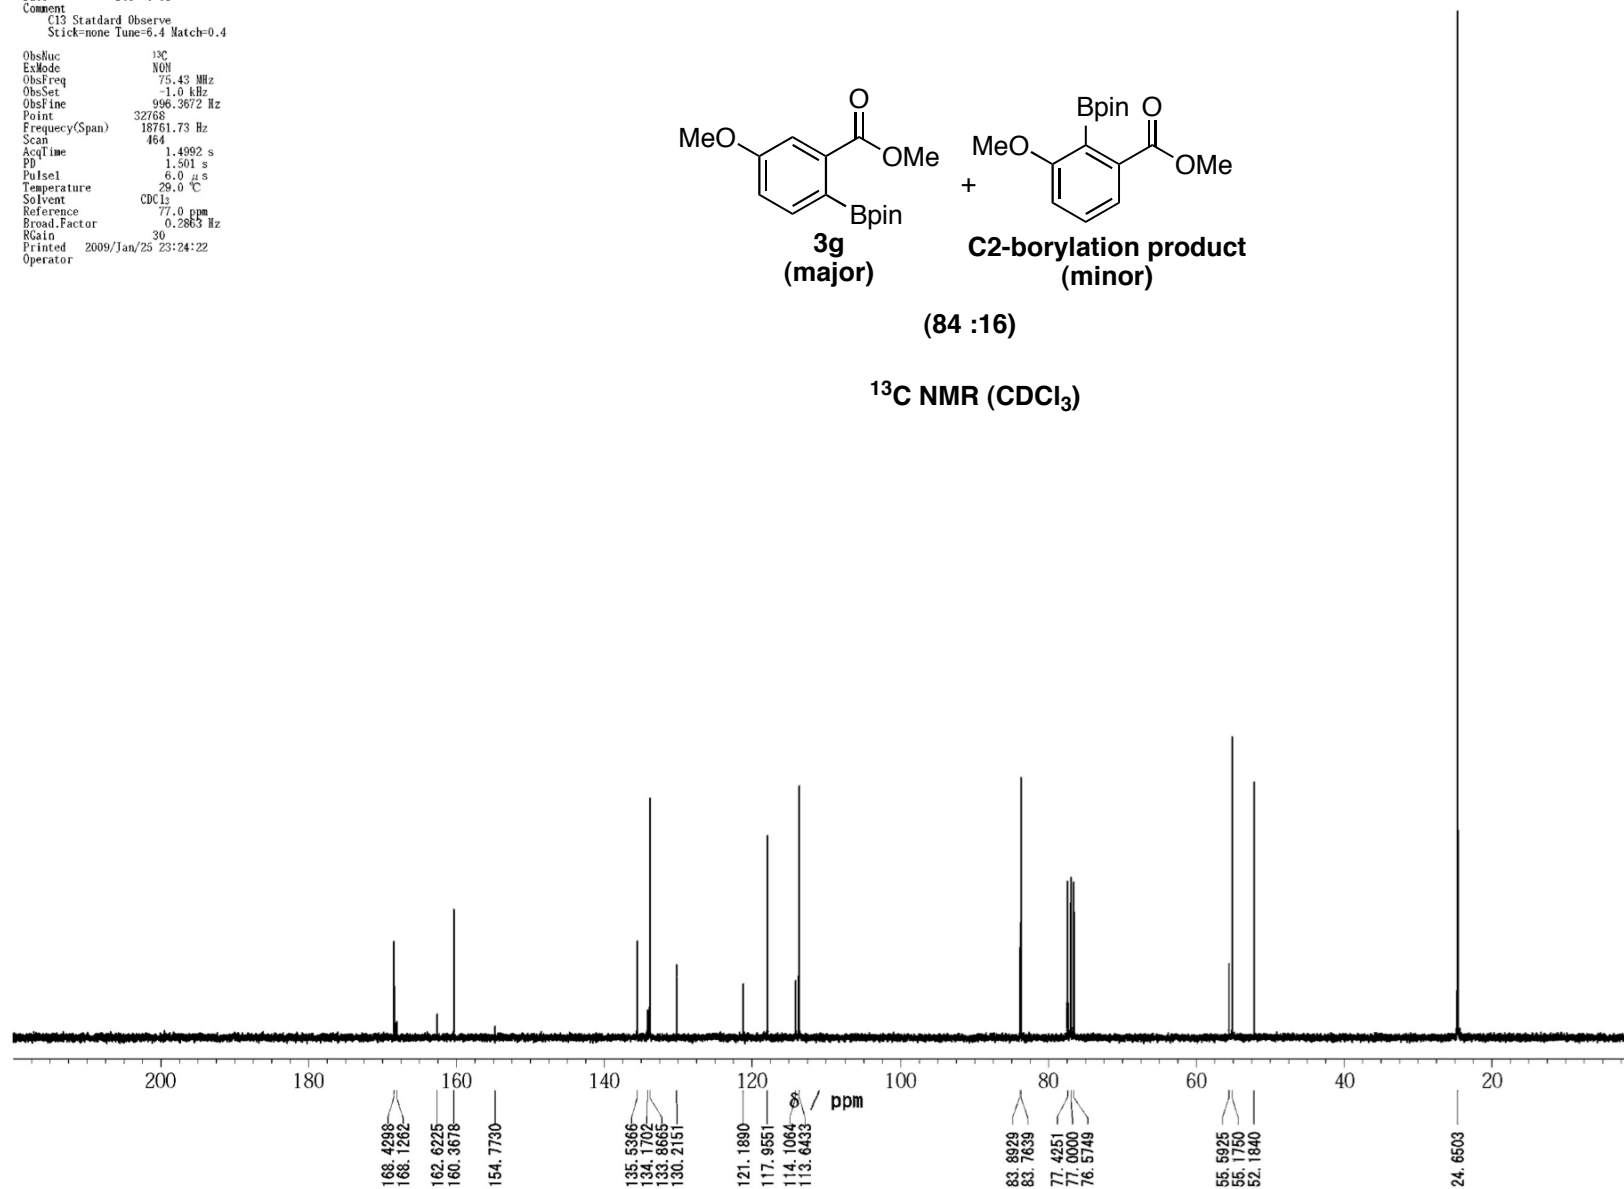

Original File: Nov 20 08  
 Date: Nov 20 08  
 Comment: STANDARD 1H OBSERVE  
 ObsNuc: <sup>1</sup>H  
 ExMode: NON  
 ObsFreq: 299.96 MHz  
 ObsSet: -1.0 kHz  
 ObsFine: 995.0047 Hz  
 Point: 16384  
 Frequency(Span): 4500.45 Hz  
 Scan: 16  
 AcqTime: 3.4983 s  
 PD: 1.502 s  
 Pulse1: 6.0 μs  
 Temperature: 29.0 °C  
 Solvent: CDCl<sub>3</sub>  
 Reference: 0.0 ppm  
 Broad.Factor: 0.1373 Hz  
 RGain: 6  
 Printed: 2009/Jan/25 23:25:01  
 Operator:

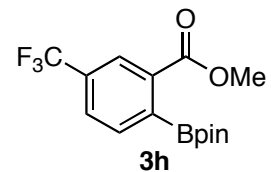

<sup>1</sup>H NMR (CDCl<sub>3</sub>)

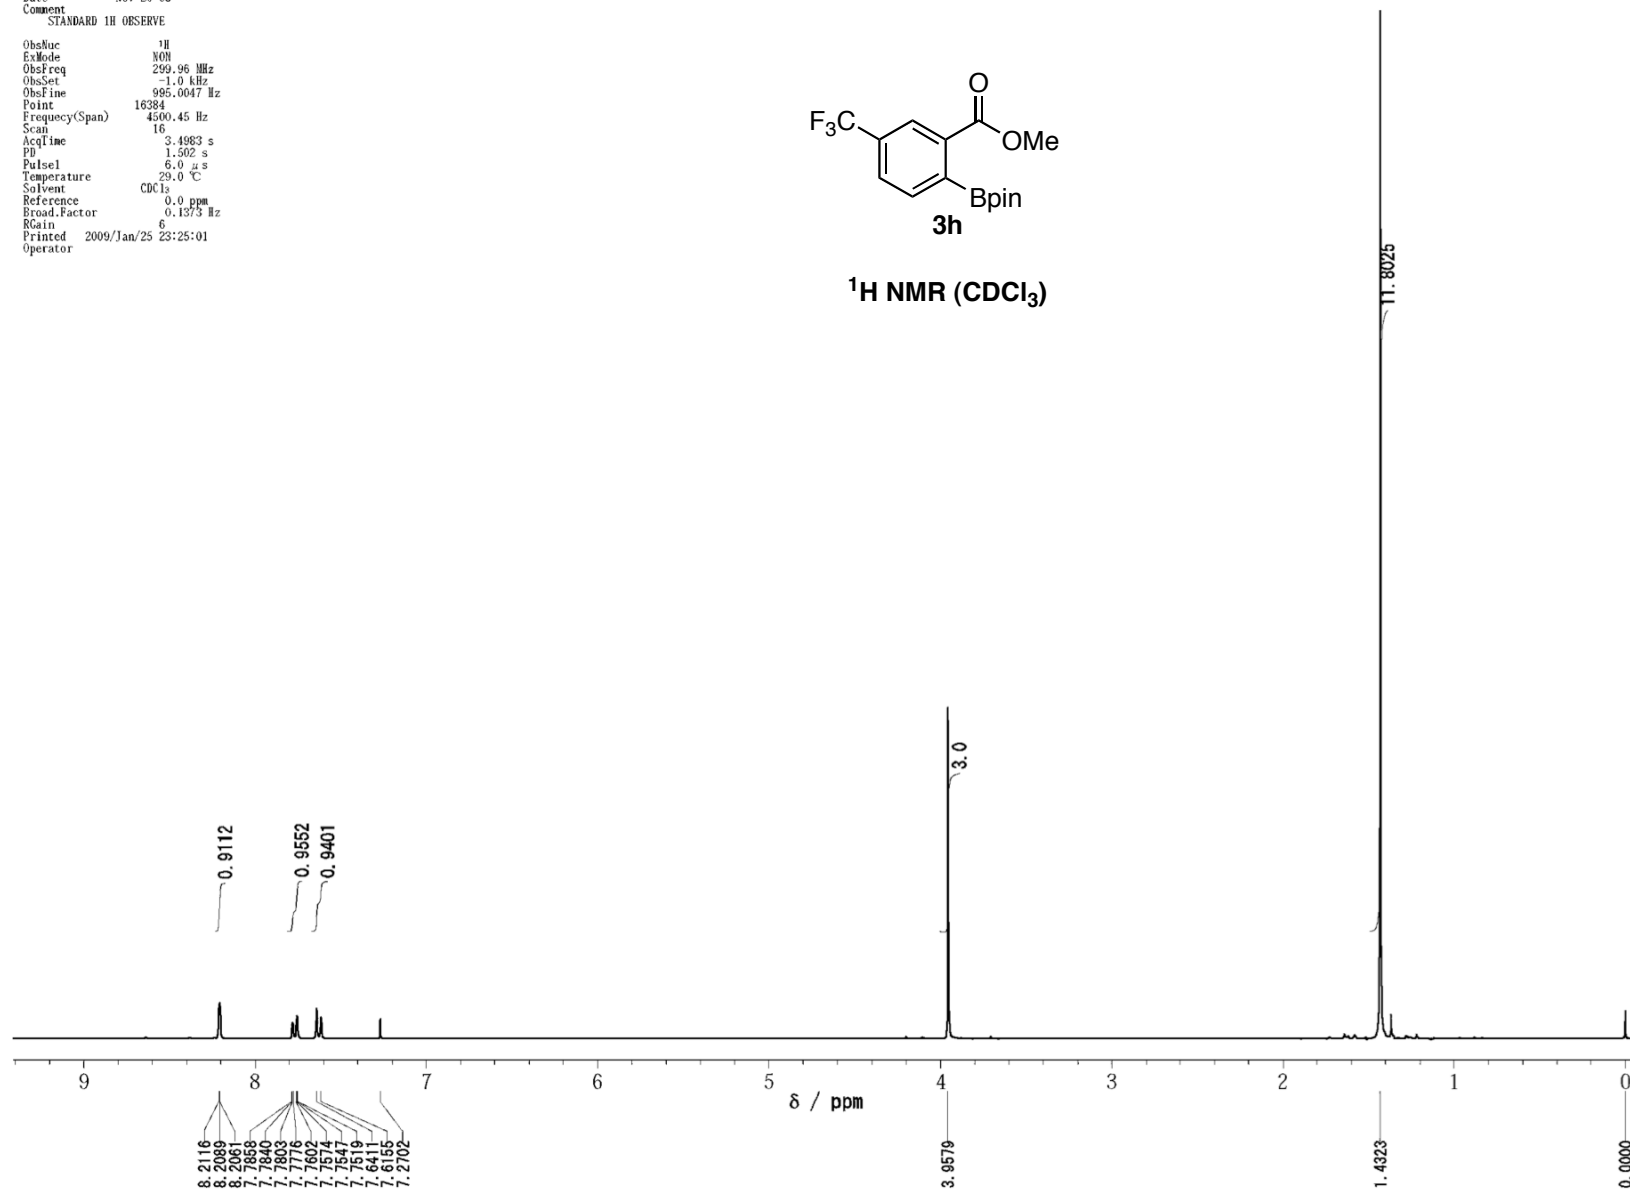

Original File:  
 Date Nov 20 08  
 Comment C13 Standard Observe  
 Stick=none Tune=6.4 Match=0.4  
 ObsNuc <sup>13</sup>C  
 ExMode NOH  
 ObsFreq 75.43 MHz  
 ObsSet -1.0 kHz  
 ObsFine 996.3672 Hz  
 Point 32768  
 Frequency(Span) 18761.73 Hz  
 Scan 432  
 AcqTime 1.4992 s  
 PD 1.501 s  
 Pulse1 6.0 μs  
 Temperature 29.0 °C  
 Solvent CDCl<sub>3</sub>  
 Reference 77.0 ppm  
 Broad.Factor 0.2863 Hz  
 RGain 30  
 Printed 2009/Jan/25 23:25:40  
 Operator

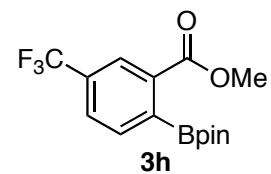

<sup>13</sup>C NMR (CDCl<sub>3</sub>)

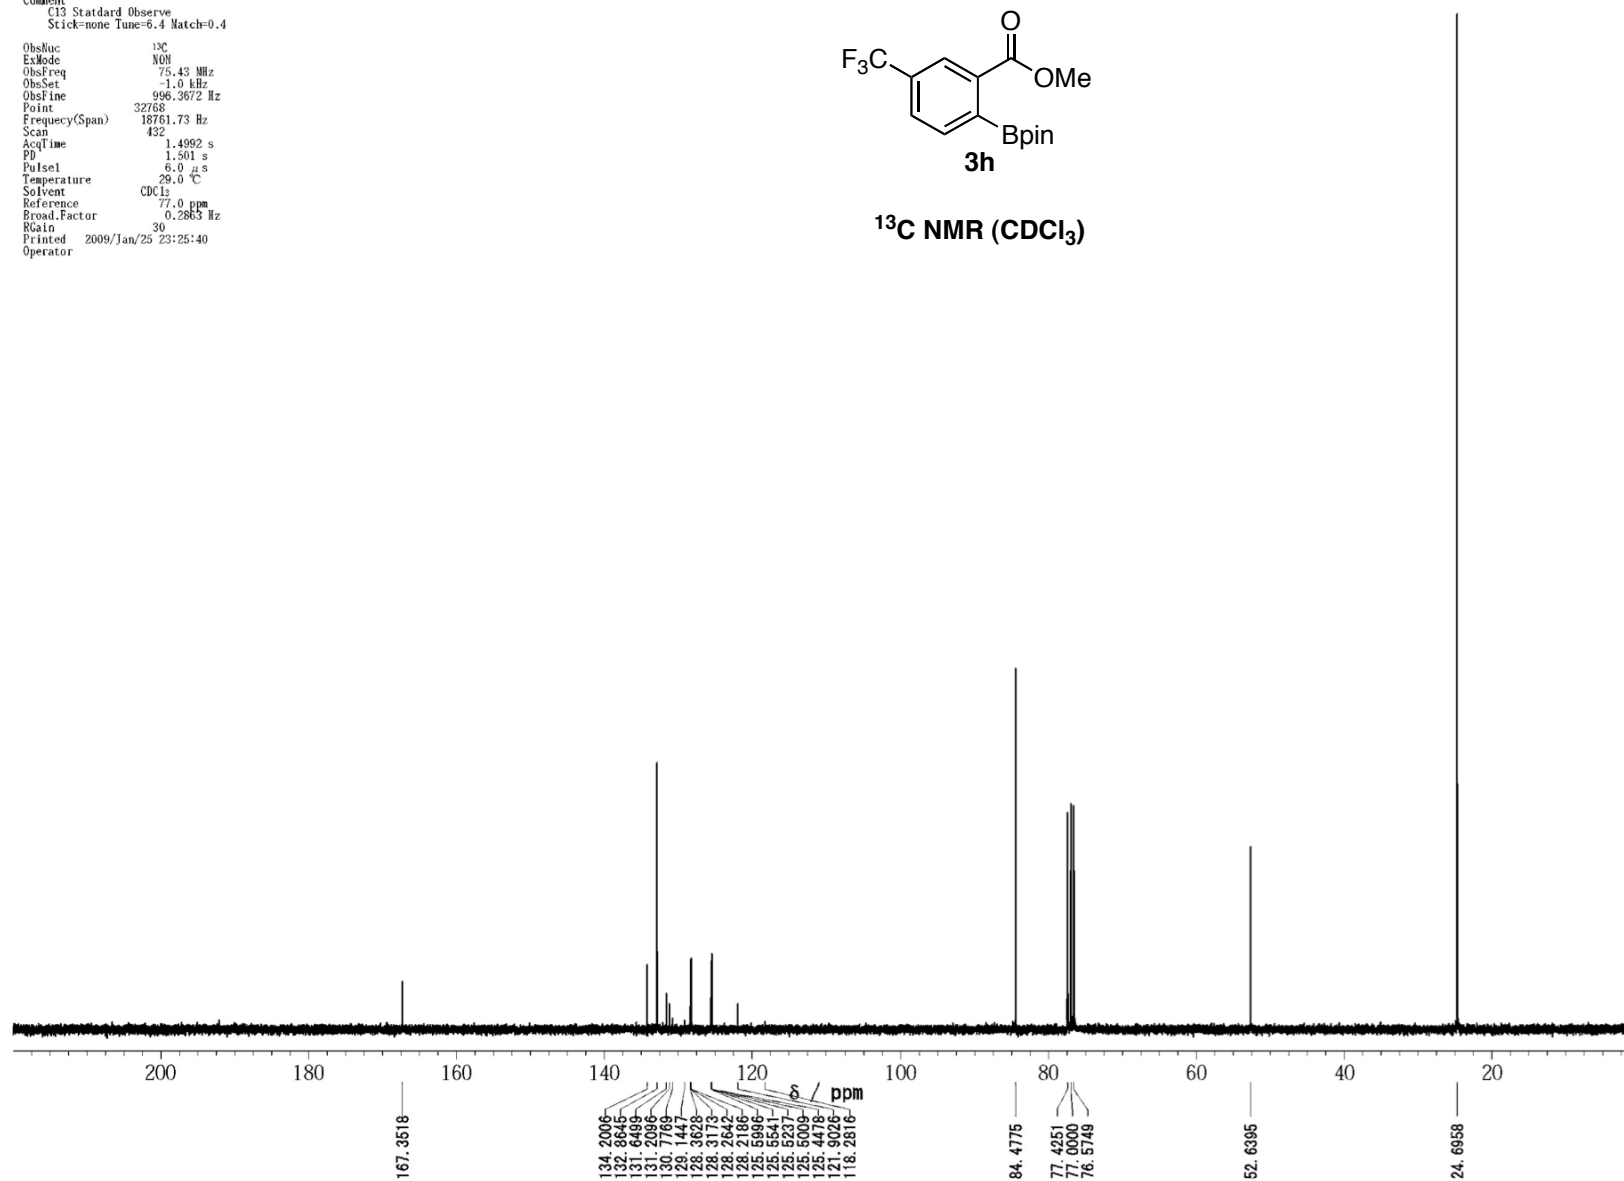

Original File: Dec 3 08  
 Date: Dec 3 08  
 Comment: STANDARD 1H OBSERVE  
 ObsNuc: 1H  
 ExMode: NON  
 ObsFreq: 299.96 MHz  
 ObsSet: -1.0 kHz  
 ObsFine: 995.0047 Hz  
 Point: 16384  
 Frequency(Span): 4500.45 Hz  
 Scan: 16  
 AcqTime: 3.4983 s  
 PD: 1.502 s  
 Pulse1: 6.0  $\mu$ s  
 Temperature: 29.0  $^{\circ}$ C  
 Solvent: CDCl<sub>3</sub>  
 Reference: 0.0 ppm  
 Broad.Factor: 0.1373 Hz  
 RGain: 6  
 Printed: 2009/Jan/25 23:26:13  
 Operator:

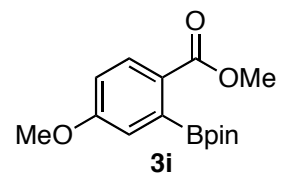

<sup>1</sup>H NMR (CDCl<sub>3</sub>)

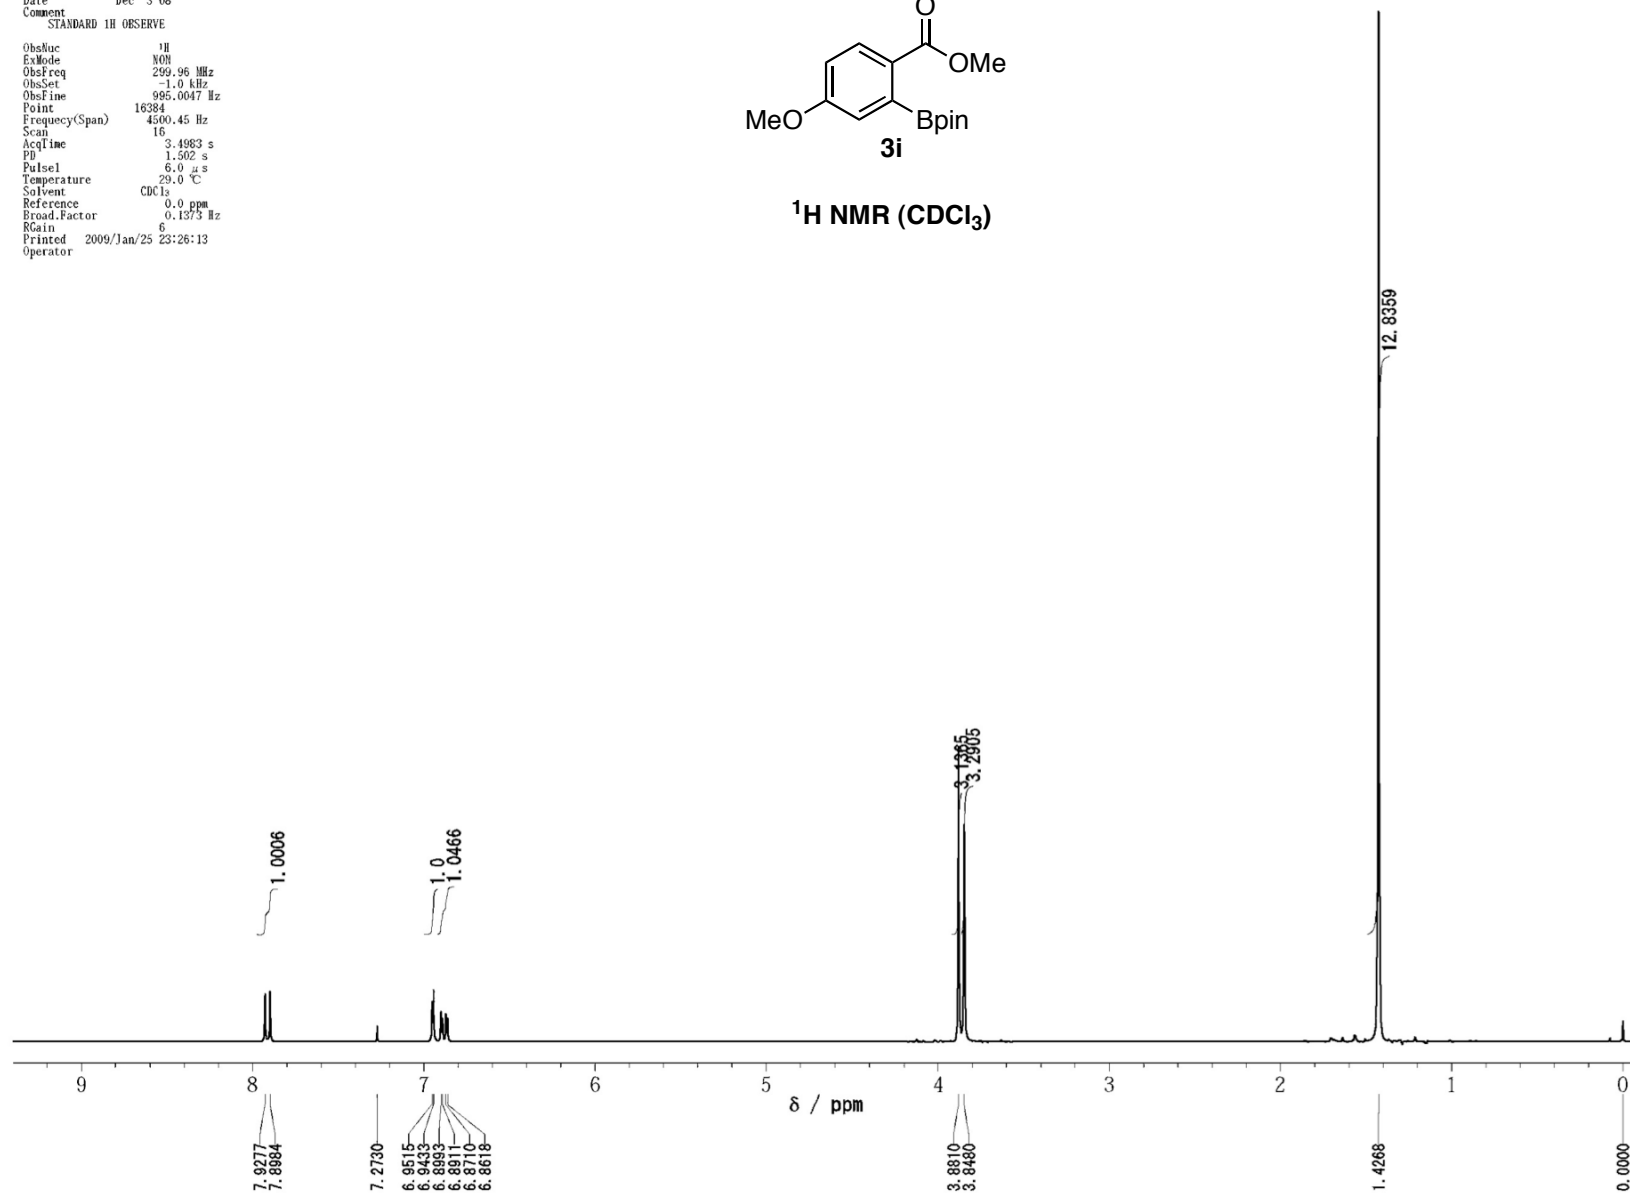

Original File: Dec 3 08  
 Date: Dec 3 08  
 Comment: C13 Standard Observe  
 Stick-none Tune=6.4 Match=0.4  
 ObsNuc: <sup>13</sup>C  
 ExMode: NOH  
 ObsFreq: 75.43 MHz  
 ObsSet: -1.0 kHz  
 ObsFine: 996.3672 Hz  
 Point: 32768  
 Frequency(Span): 18761.73 Hz  
 Scan: 288  
 AcqTime: 1.4992 s  
 PD: 1.501 s  
 Pulse1: 6.0 μs  
 Temperature: 29.0 °C  
 Solvent: CDCl<sub>3</sub>  
 Reference: 77.0 ppm  
 Broad.Factor: 0.2863 Hz  
 RGain: 30  
 Printed: 2009/Jan/25 23:26:49  
 Operator:

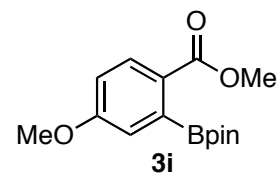

**<sup>13</sup>C NMR (CDCl<sub>3</sub>)**

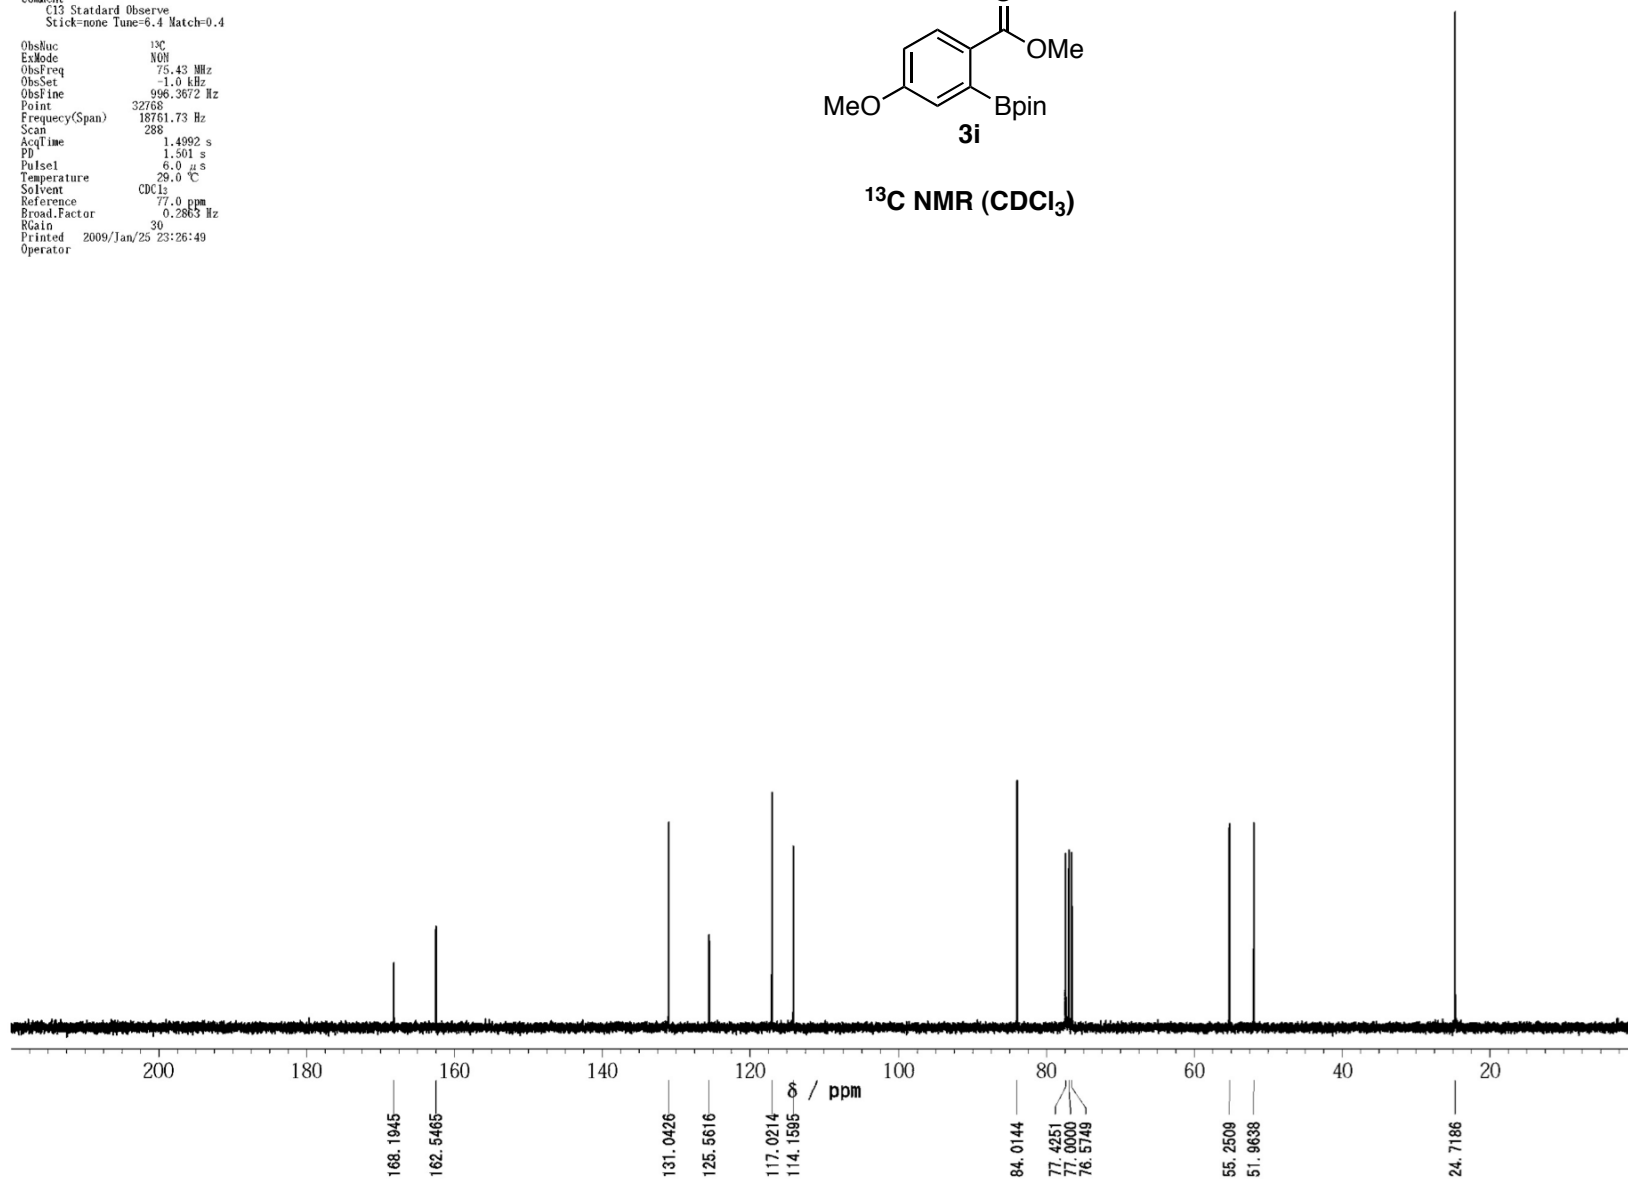

**$^1\text{H}$  NMR spectrum of the crude material on a reaction of 1i (Table 1, entry 9)**

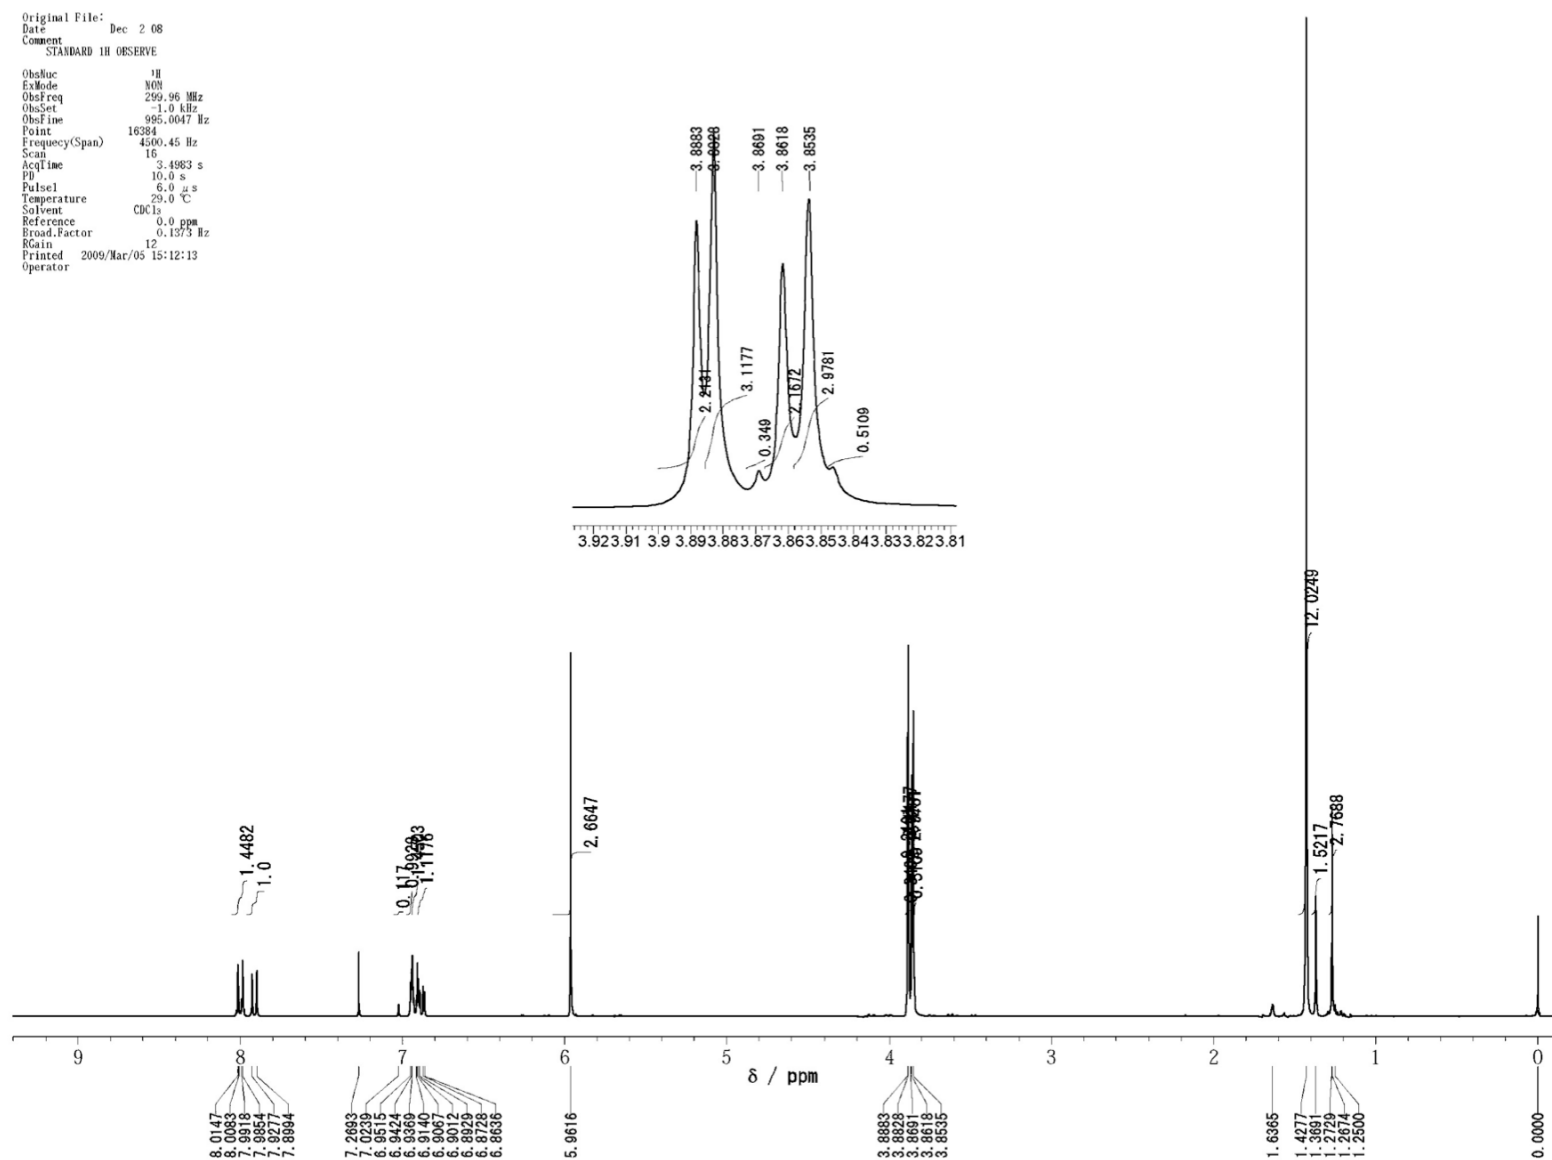

Original File:  
 Date Aug 26 08  
 Comment STANDARD 1H OBSERVE  
 ObsNuc 1H  
 ExMode NON  
 ObsFreq 299.96 MHz  
 ObsSet -1.0 kHz  
 ObsFine 995.0047 Hz  
 Point 16384  
 Frequency(Span) 4500.45 Hz  
 Scan 32  
 AcqTime 3.4983 s  
 PD 1.502 s  
 Pulse1 6.0  $\mu$ s  
 Temperature 29.0  $^{\circ}$ C  
 Solvent CDCl<sub>3</sub>  
 Reference 0.0 ppm  
 Broad.Factor 0.1373 Hz  
 RGain 30  
 Printed 2009/Jan/25 23:27:24  
 Operator

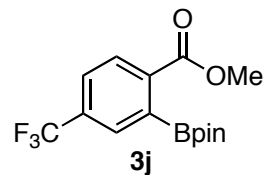

<sup>1</sup>H NMR (CDCl<sub>3</sub>)

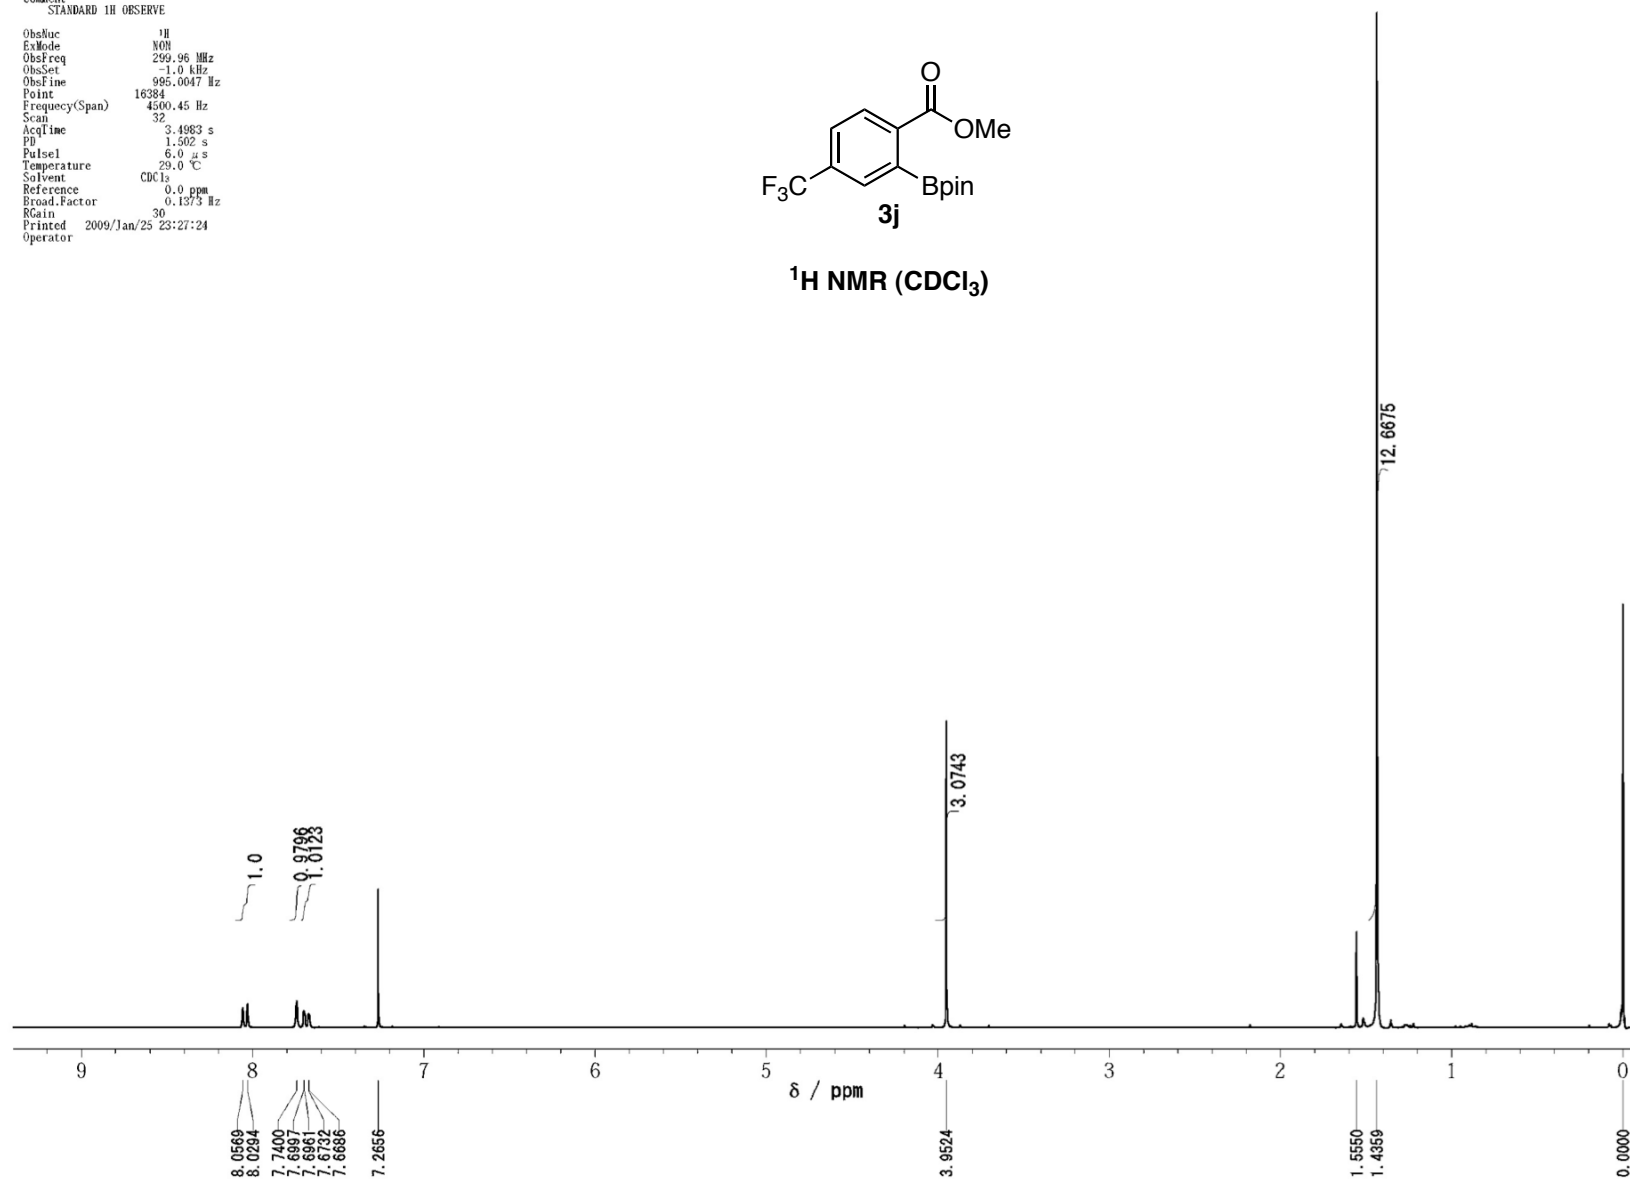



Original File: Sep 1 08  
 Date: Sep 1 08  
 Comment: C13 Standard Observe  
 Stick=none Tune=6.4 Match=0.4  
 ObsNuc: <sup>13</sup>C  
 ExMode: NOH  
 ObsFreq: 75.43 MHz  
 ObsSet: -1.0 kHz  
 ObsFine: 996.3672 Hz  
 Point: 32768  
 Frequency(Span): 18761.73 Hz  
 Scan: 6000  
 AcqTime: 1.4992 s  
 PD: 1.501 s  
 Pulse1: 6.0 μs  
 Temperature: 29.0 °C  
 Solvent: CDCl<sub>3</sub>  
 Reference: 77.0 ppm  
 Broad.Factor: 0.2863 Hz  
 RGain: 30  
 Printed: 2009/Jan/25 23:27:58  
 Operator:

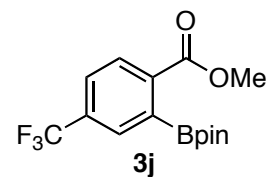

<sup>13</sup>C NMR (CDCl<sub>3</sub>)

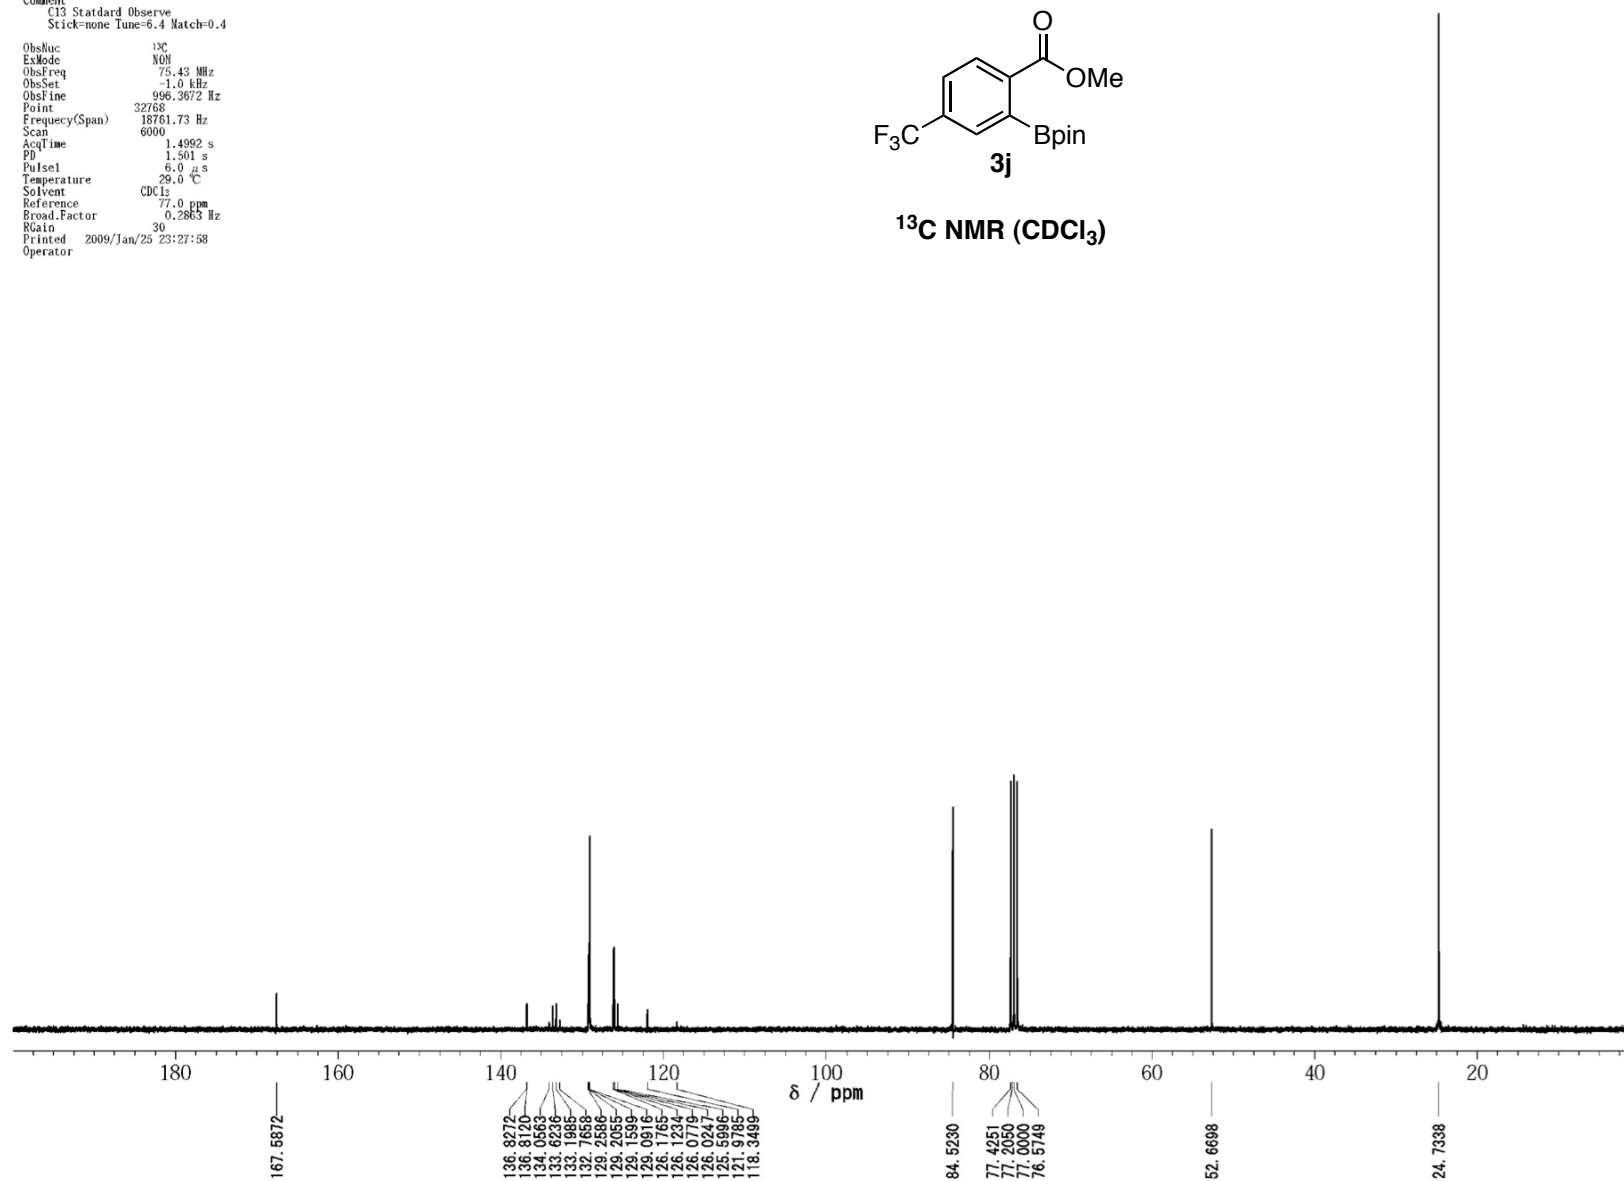

**$^1\text{H}$  NMR spectrum of the crude material on a reaction of 1j (Table 1, entry 10)**

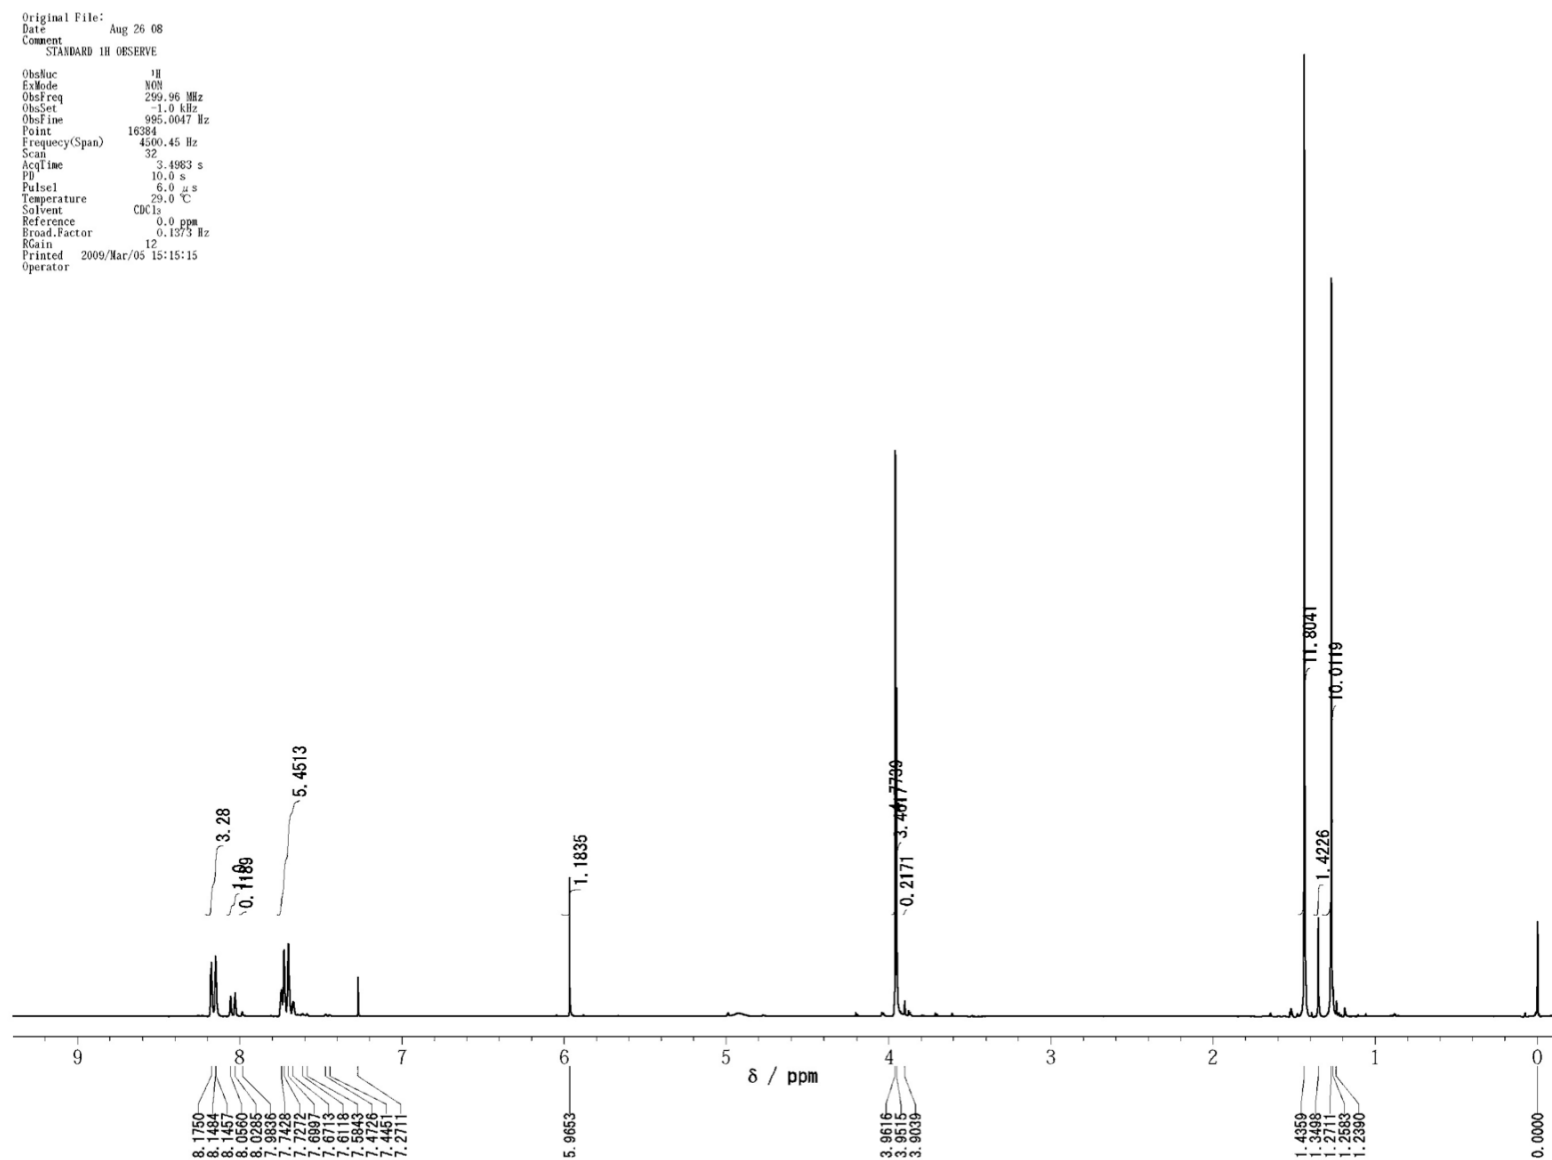

Original File:  
 Date Sep 22 08  
 Comment STANDARD 1H OBSERVE  
 ObsNuc 1H  
 ExMode NON  
 ObsFreq 299.96 MHz  
 ObsSet -1.0 kHz  
 ObsFine 995.0047 Hz  
 Point 16384  
 Frequency(Span) 4500.45 Hz  
 Scan 16  
 AcqTime 3.4983 s  
 PD 1.502 s  
 Pulse1 1.0  $\mu$ s  
 Temperature 29.0  $^{\circ}$ C  
 Solvent CDCl<sub>3</sub>  
 Reference 0.0 ppm  
 Broad.Factor 0.1373 Hz  
 RGain 12  
 Printed 2009/Jan/25 23:28:30  
 Operator

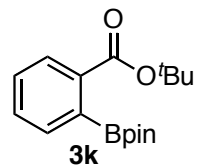

<sup>1</sup>H NMR (CDCl<sub>3</sub>)

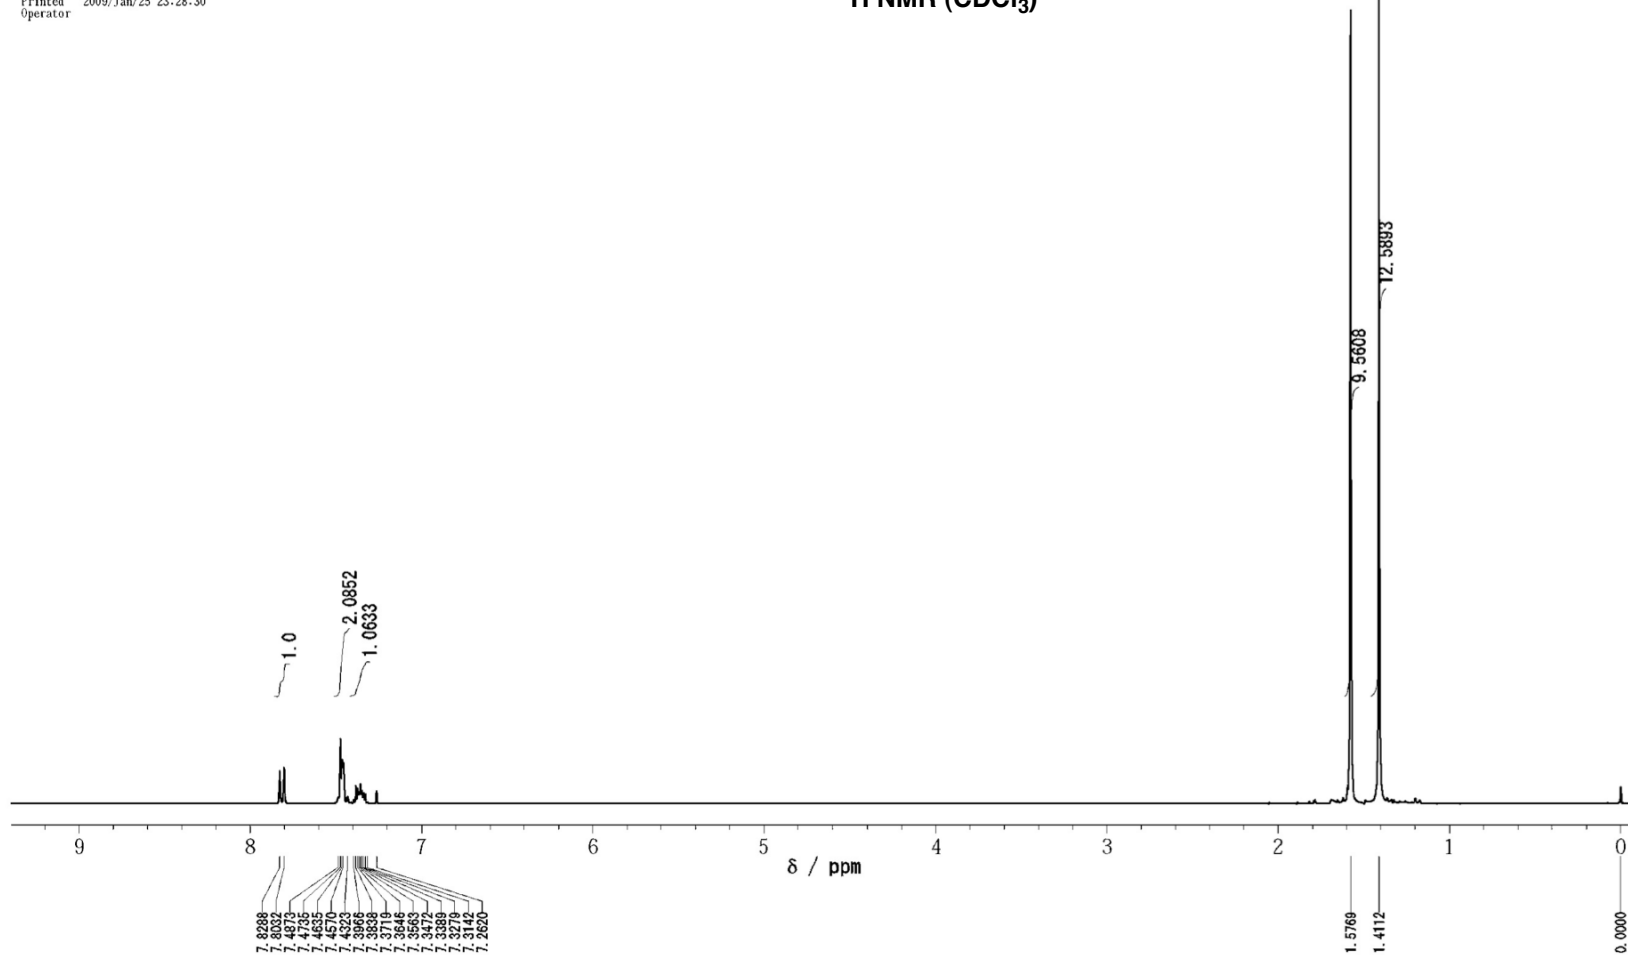

Original File:  
 Date Sep 22 08  
 Comment C13 Standard Observe  
 Stick-none Tune=6.4 Match=0.4  
 ObsNuc <sup>13</sup>C  
 ExMode NOH  
 ObsFreq 75.43 MHz  
 ObsSet -1.0 kHz  
 ObsFine 996.3672 Hz  
 Point 32768  
 Frequency(Span) 18761.73 Hz  
 Scan 320  
 AcqTime 1.4992 s  
 PD 1.501 s  
 Pulse1 6.0  $\mu$ s  
 Temperature 29.0  $^{\circ}$ C  
 Solvent CDCl<sub>3</sub>  
 Reference 77.0 ppm  
 Broad.Factor 0.2863 Hz  
 RGain 30  
 Printed 2009/Jun/25 23:29:07  
 Operator

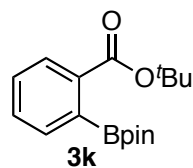

<sup>13</sup>C NMR (CDCl<sub>3</sub>)

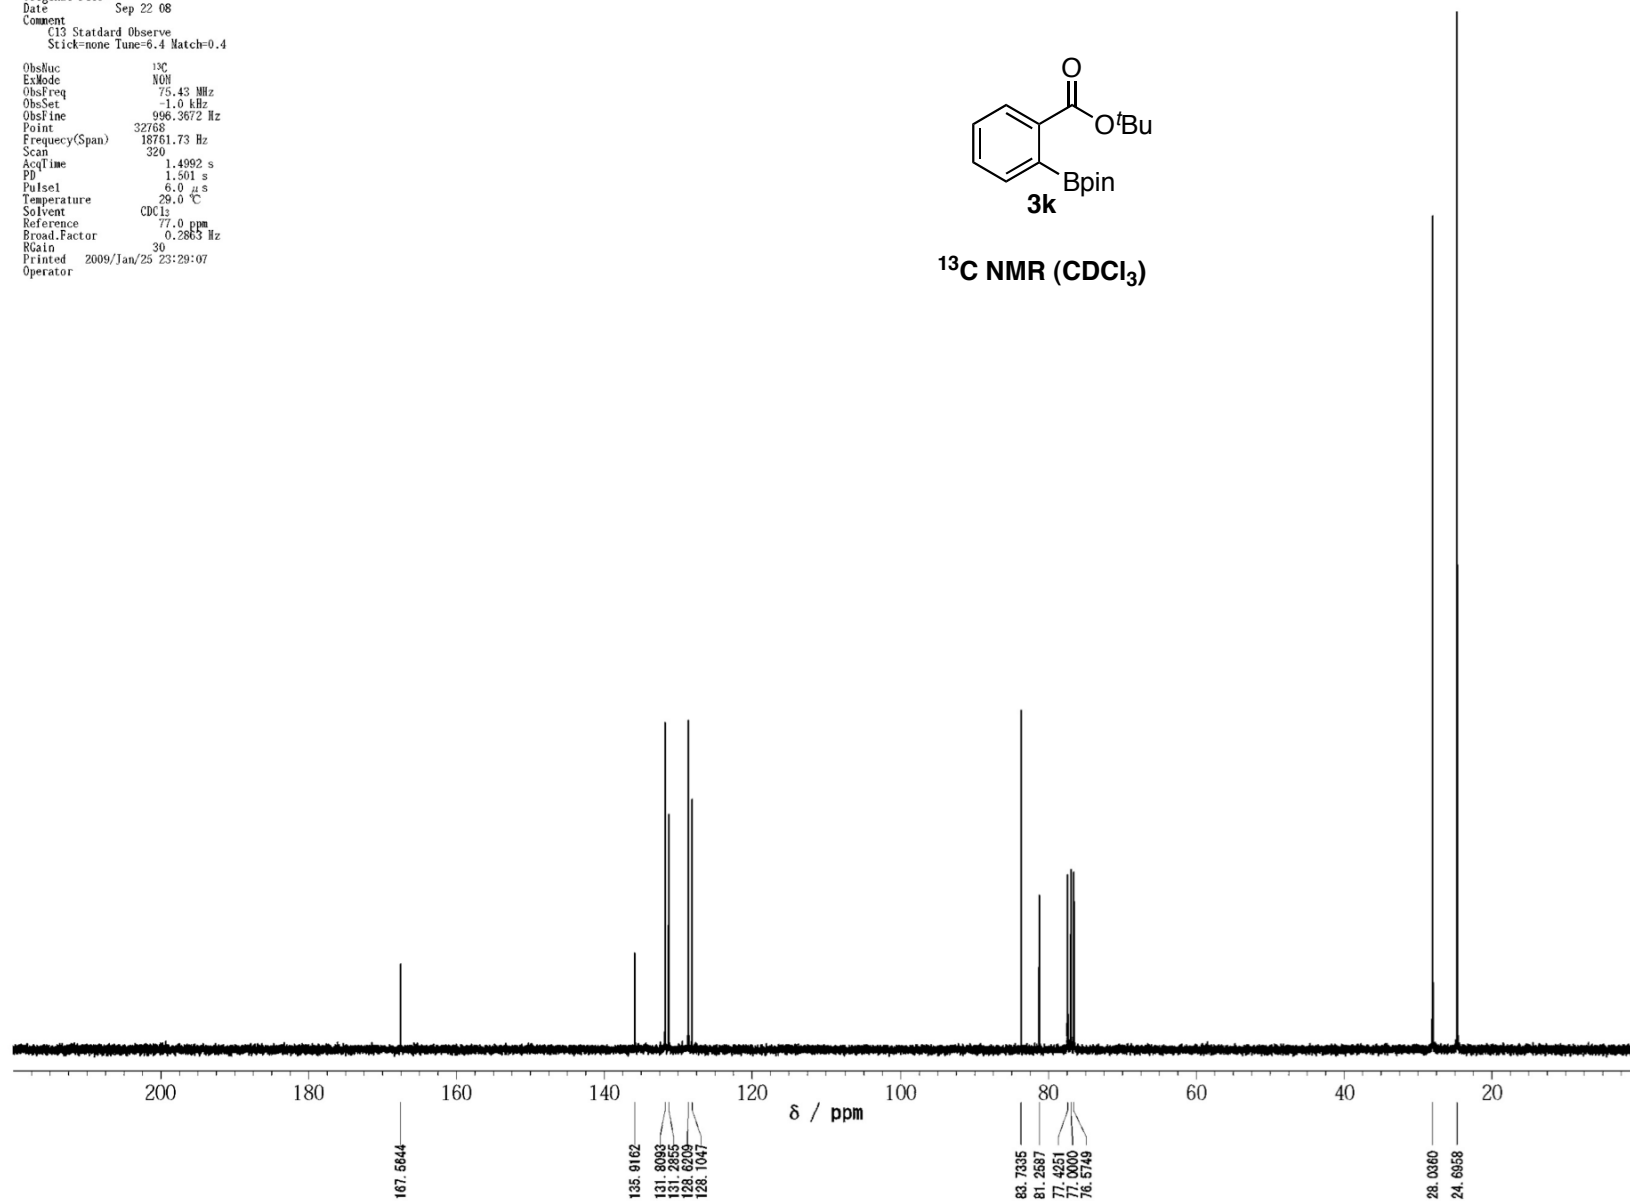

Original File:  
 Date Jun 22 08  
 Comment STANDARD 1H OBSERVE  
 ObsNuc 1H  
 ExMode NON  
 ObsFreq 299.96 MHz  
 ObsSet -1.0 kHz  
 ObsFine 995.0047 Hz  
 Point 16384  
 Frequency(Span) 4500.45 Hz  
 Scan 32  
 AcqTime 3.4983 s  
 PD 1.502 s  
 Pulse1 6.0  $\mu$ s  
 Temperature 29.0  $^{\circ}$ C  
 Solvent CDCl<sub>3</sub>  
 Reference 0.0 ppm  
 Broad.Factor 0.1373 Hz  
 RGain 24  
 Printed 2009/Jun/25 23:29:39  
 Operator

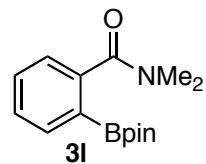

<sup>1</sup>H NMR (CDCl<sub>3</sub>)

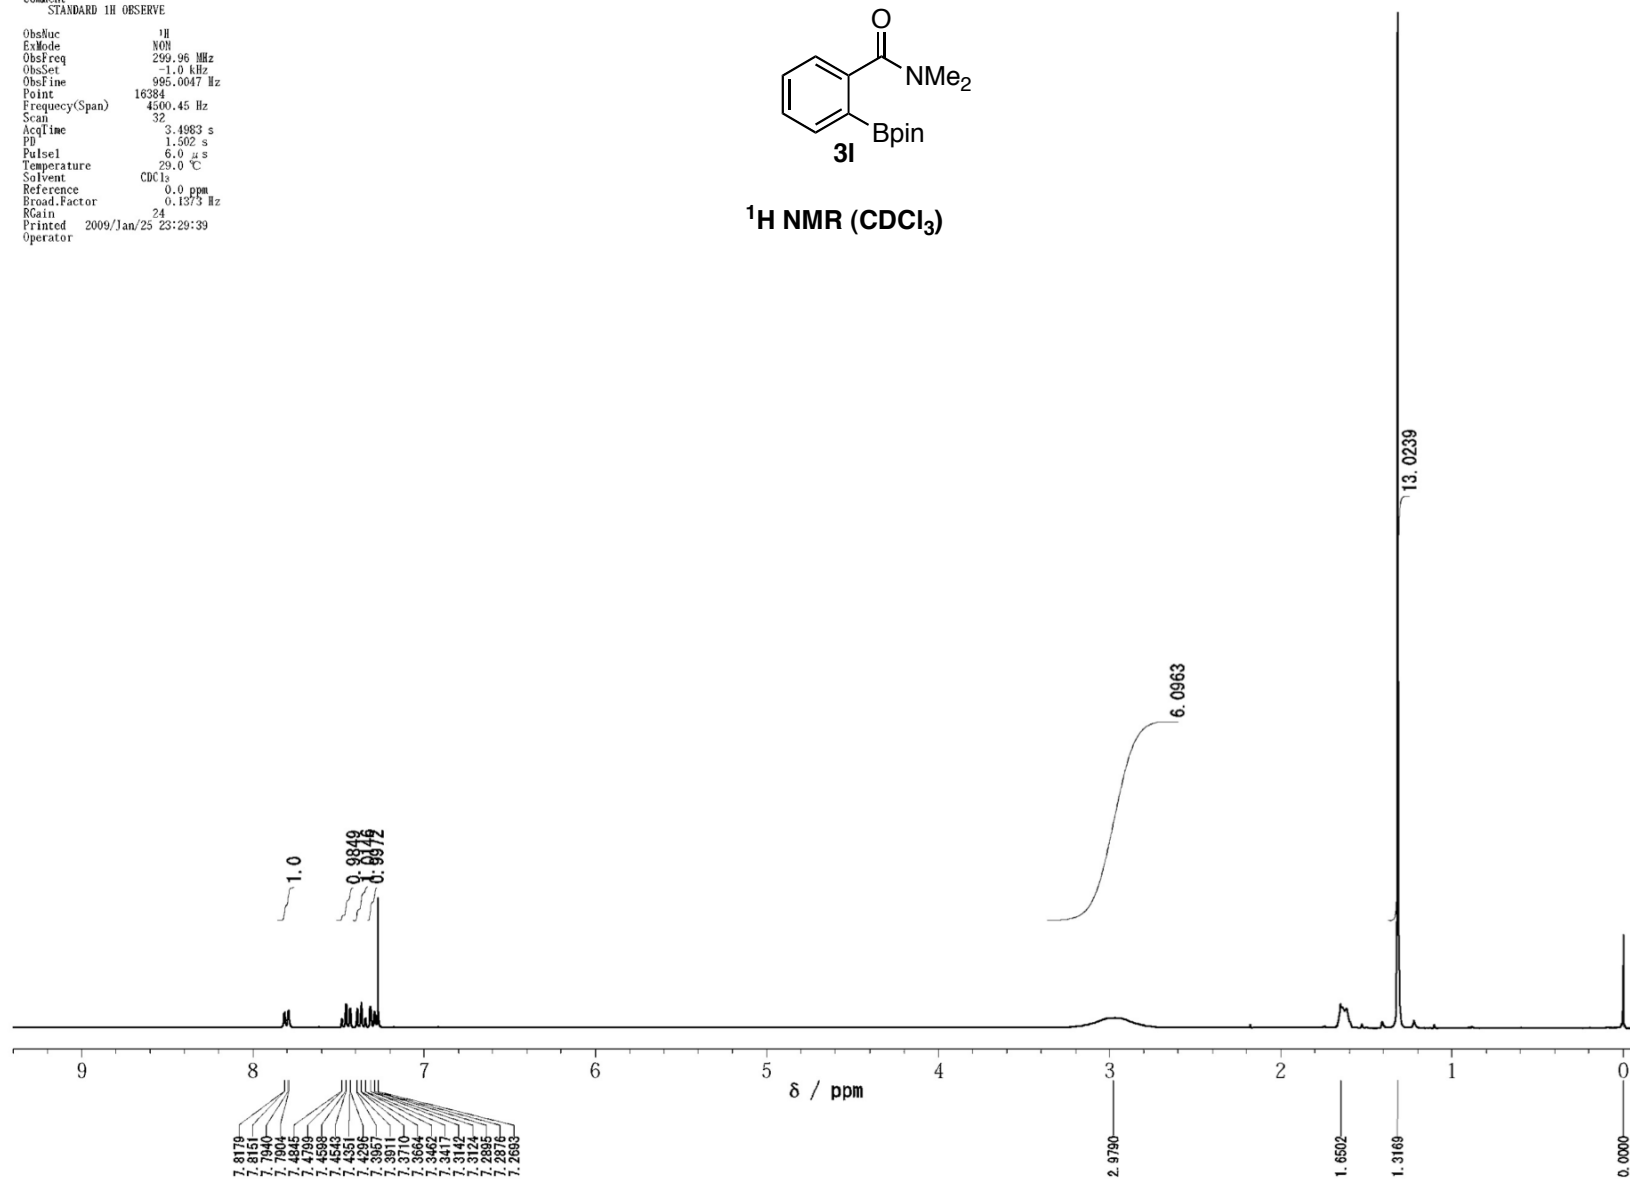

Original File:  
 Date Jun 22 08  
 Comment C13 Standard Observe  
 Stick-none Tune=6.4 Match=0.4  
 ObsNuc <sup>13</sup>C  
 ExMode NOH  
 ObsFreq 75.43 MHz  
 ObsSet -1.0 kHz  
 ObsFine 996.3672 Hz  
 Point 32768  
 Frequency(Span) 18761.73 Hz  
 Scan 2880  
 AcqTime 1.4992 s  
 PD 1.501 s  
 Pulse1 6.0 μs  
 Temperature 29.0 °C  
 Solvent CDCl<sub>3</sub>  
 Reference 77.0 ppm  
 Broad.Factor 0.2863 Hz  
 RGain 30  
 Printed 2009/Jan/25 23:30:16  
 Operator

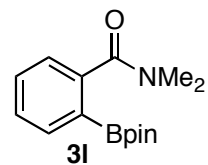

<sup>13</sup>C NMR (CDCl<sub>3</sub>)

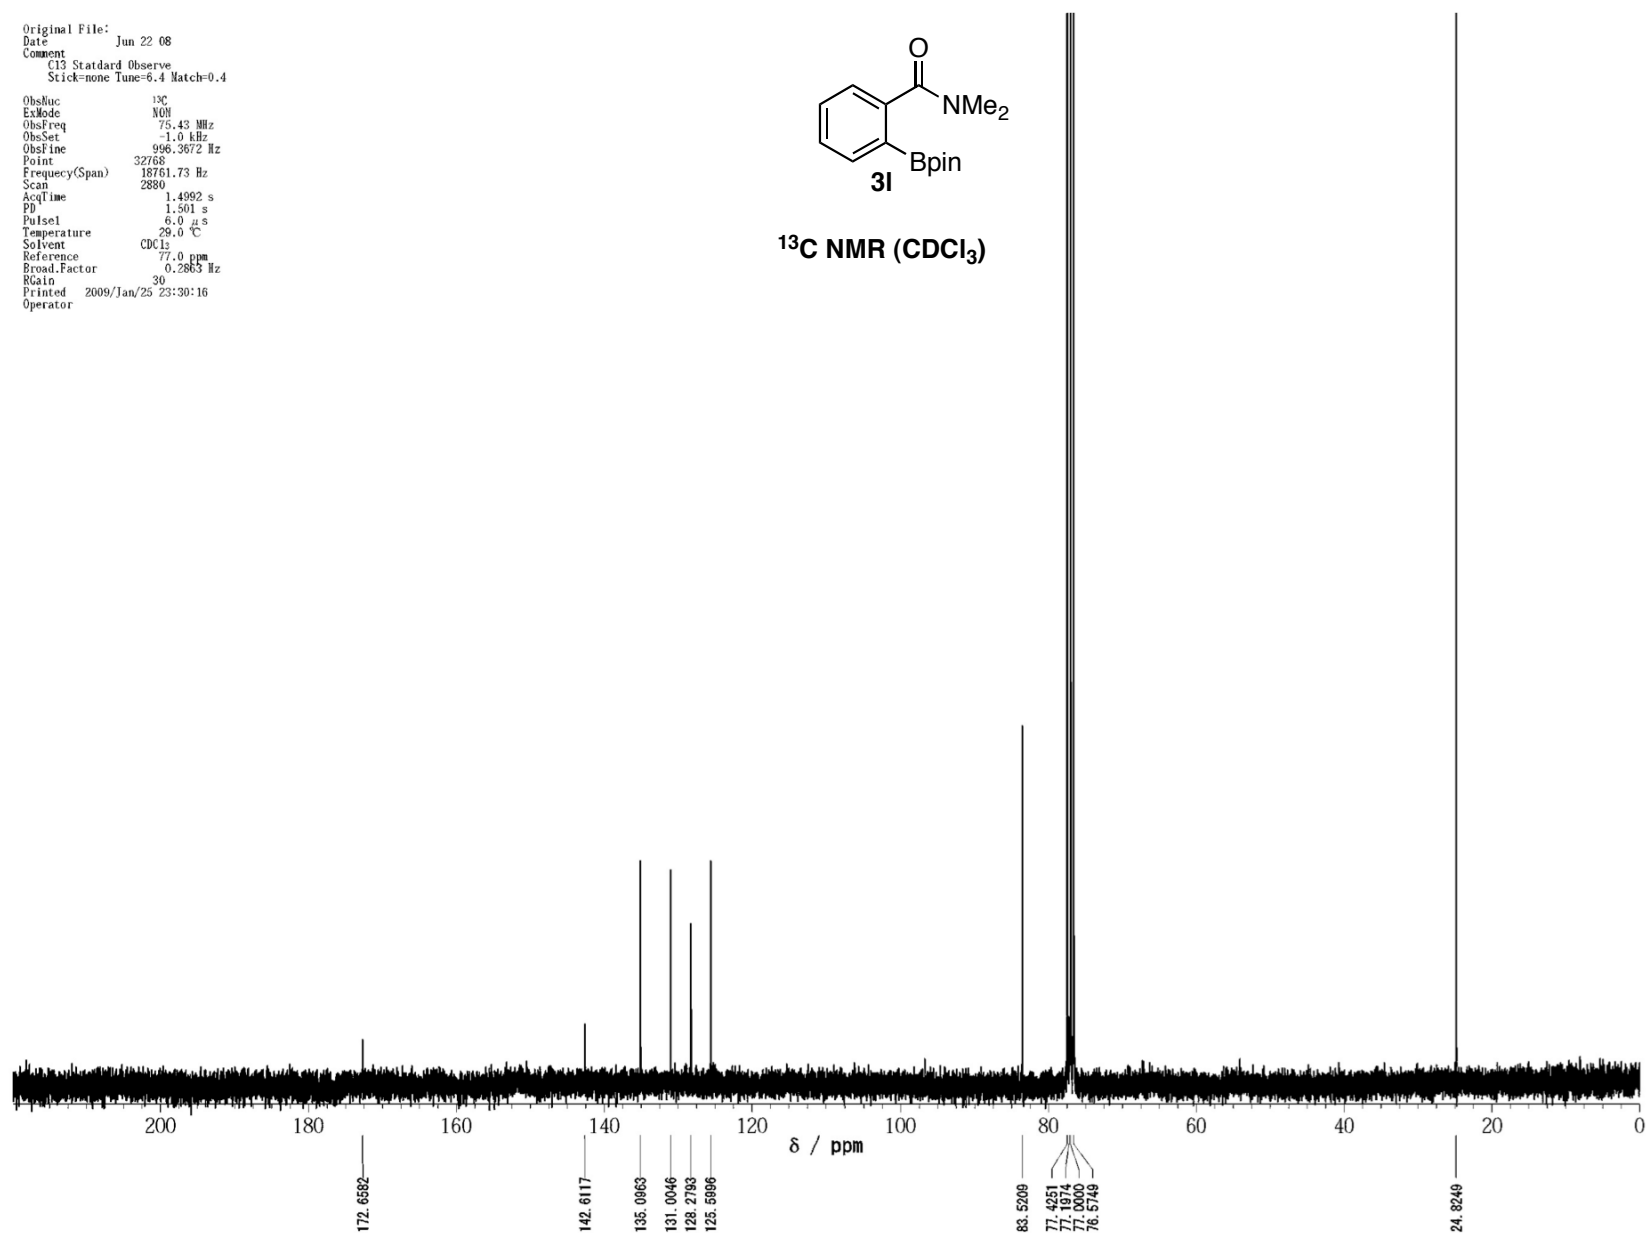

Original File:  
 Date Jan 20 09  
 Comment STANDARD 1H OBSERVE  
 ObsNuc 1H  
 ExMode NON  
 ObsFreq 299.96 MHz  
 ObsSet -1.0 kHz  
 ObsFine 995.0047 Hz  
 Point 16384  
 Frequency(Span) 4500.45 Hz  
 Scan 16  
 AcqTime 3.4983 s  
 PD 1.502 s  
 Pulse 6.0  $\mu$ s  
 Temperature 29.0  $^{\circ}$ C  
 Solvent CDCl<sub>3</sub>  
 Reference 0.0 ppm  
 Broad.Factor 0.1373 Hz  
 RGain 30  
 Printed 2009/Jan/25 23:30:52  
 Operator

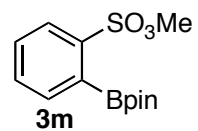

<sup>1</sup>H NMR (CDCl<sub>3</sub>)

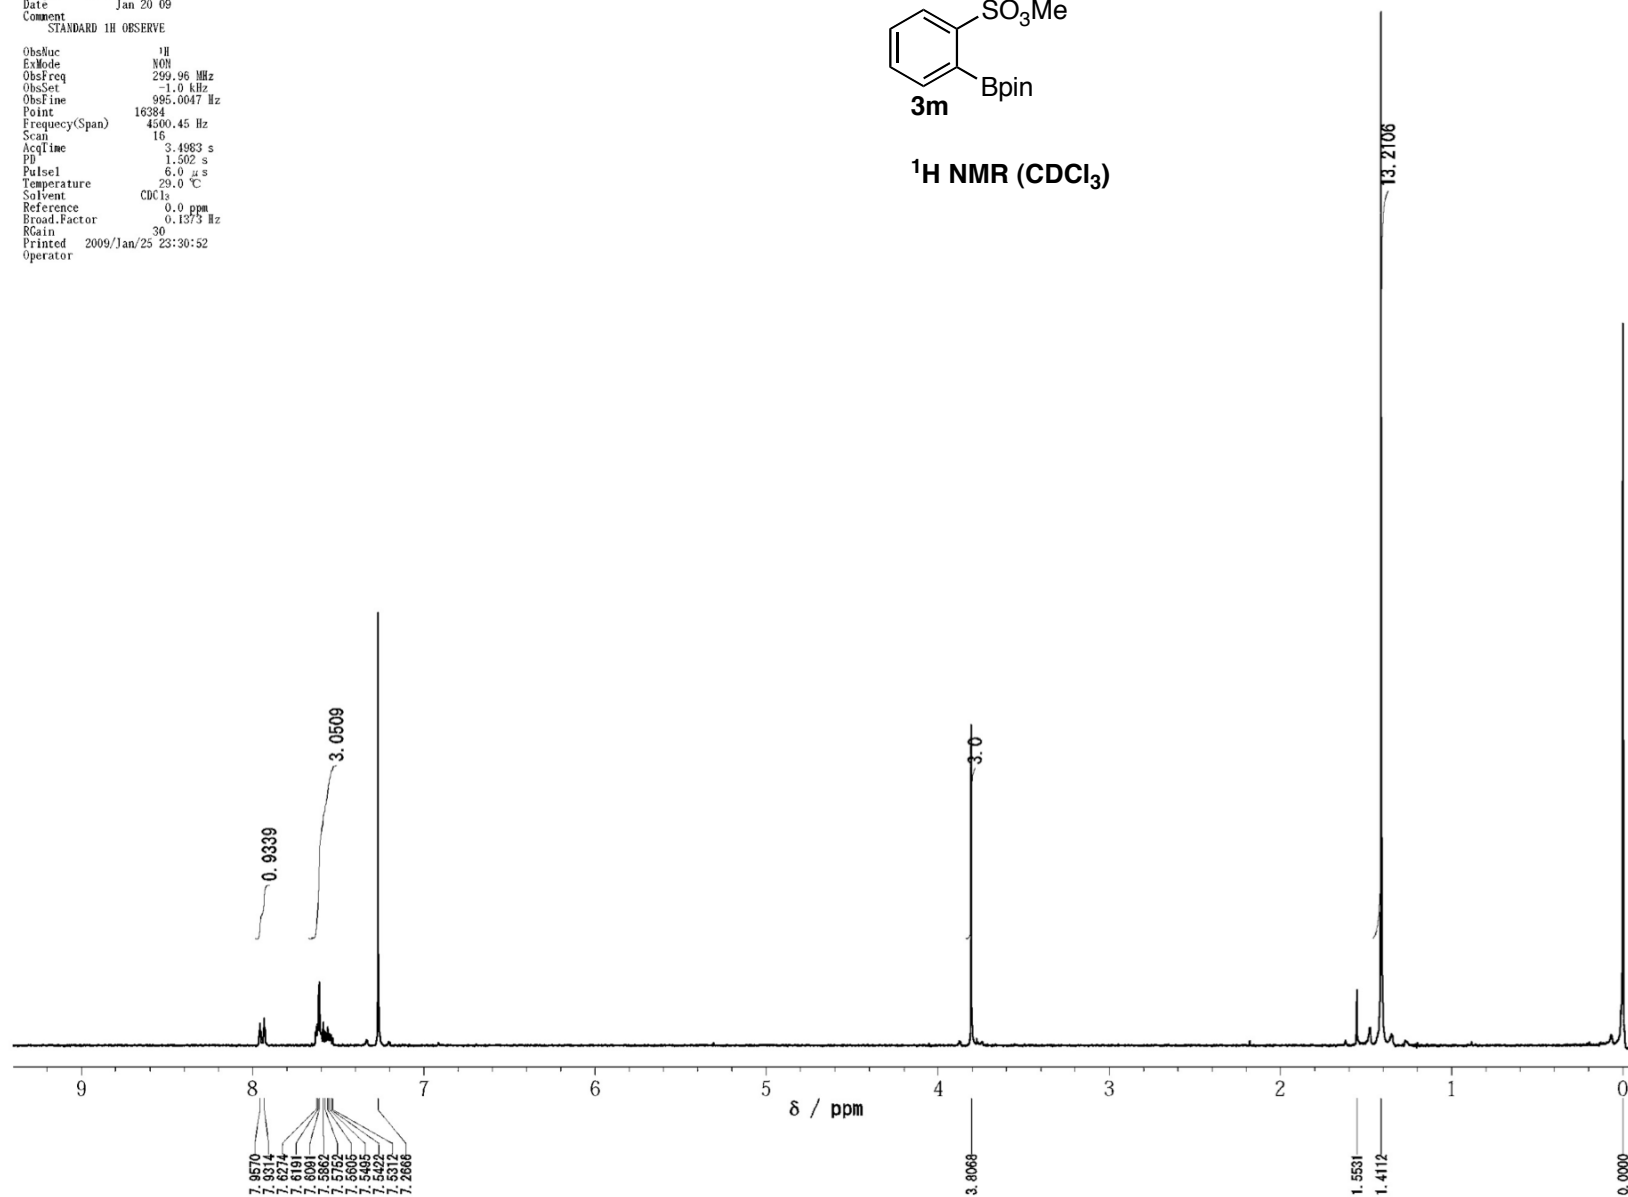

Original File:  
 Date Jan 22 09  
 Comment C13 Standard Observe  
 Stick=none Tune=6.4 Match=0.4  
 ObsNuc <sup>13</sup>C  
 ExMode NOH  
 ObsFreq 75.43 MHz  
 ObsSet -1.0 kHz  
 ObsFine 996.3672 Hz  
 Point 32768  
 Frequency(Span) 18761.73 Hz  
 Scan 112  
 AcqTime 1.4992 s  
 PD 1.501 s  
 Pulse1 6.0 μs  
 Temperature 29.0 °C  
 Solvent CDCl<sub>3</sub>  
 Reference 77.0 ppm  
 Broad.Factor 0.2863 Hz  
 RGain 30  
 Printed 2009/Jan/25 23:31:25  
 Operator

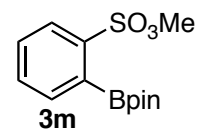

**<sup>13</sup>C NMR (CDCl<sub>3</sub>)**

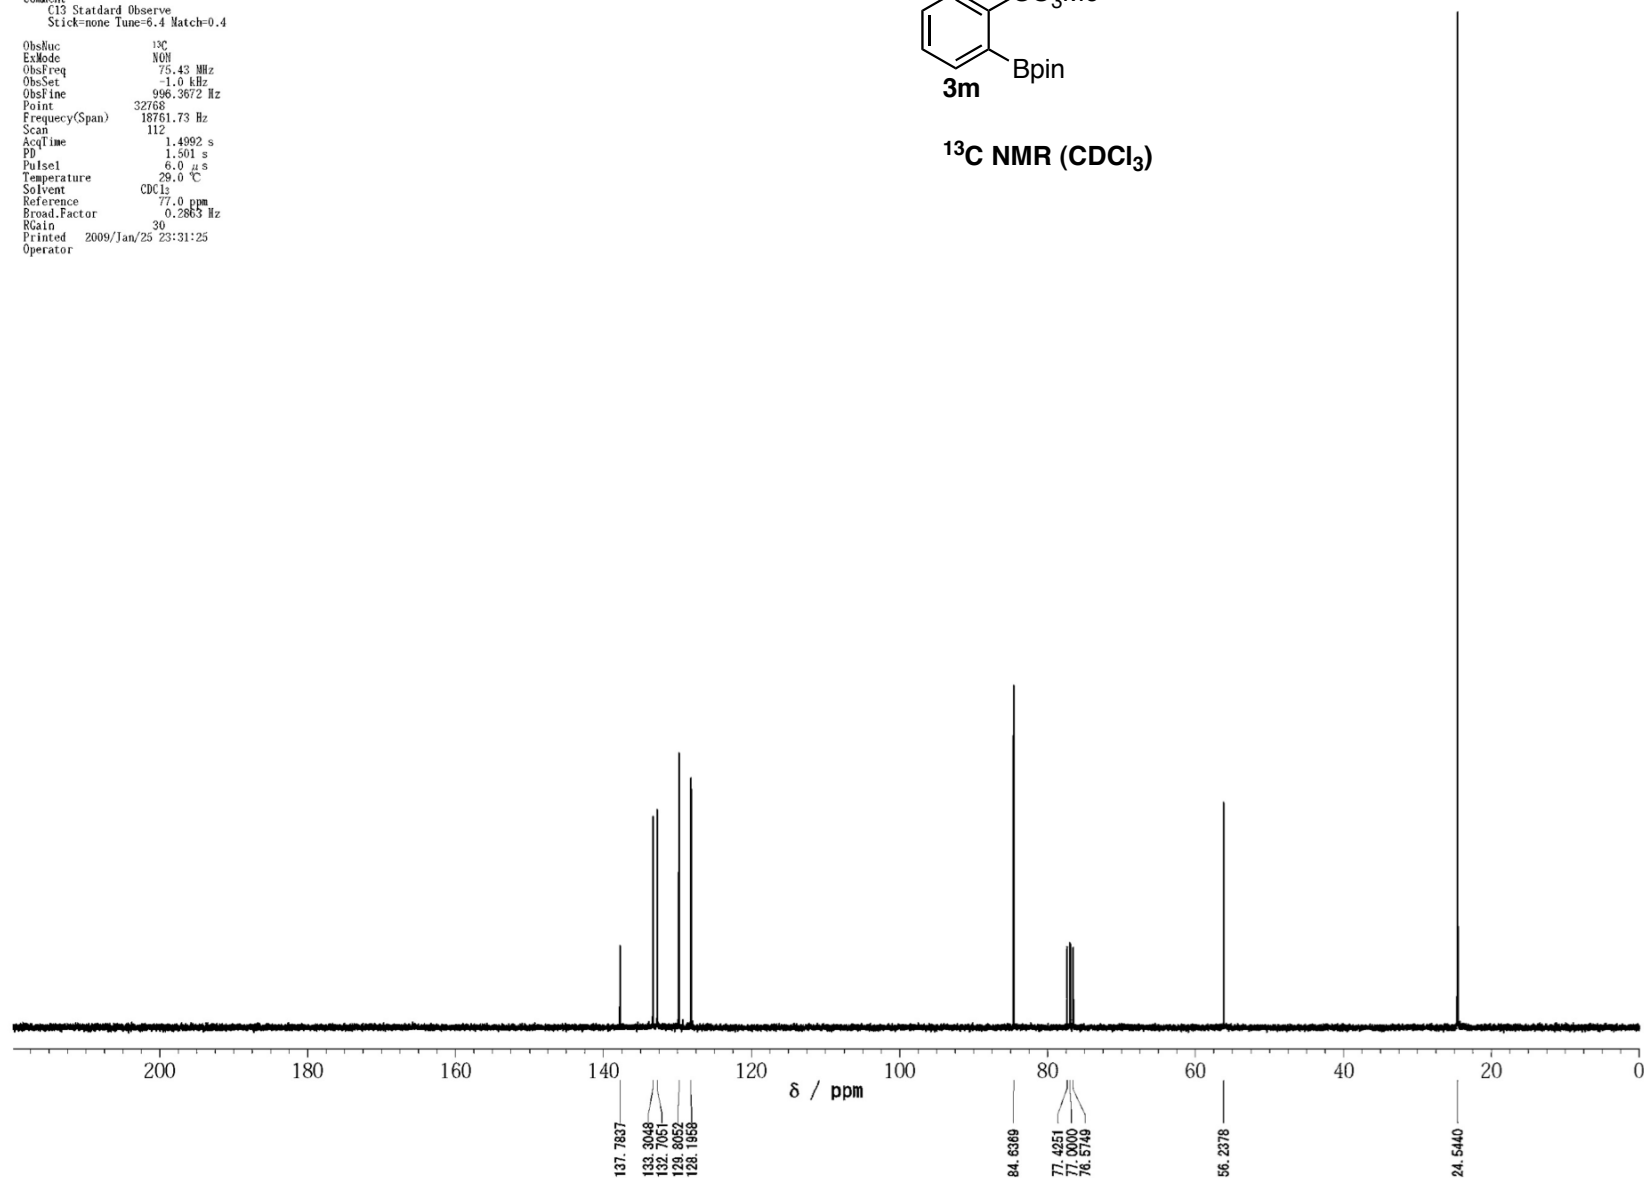



<sup>1</sup>H NMR spectrum of the crude material on a reaction of 1m (Table 2, entry 3)

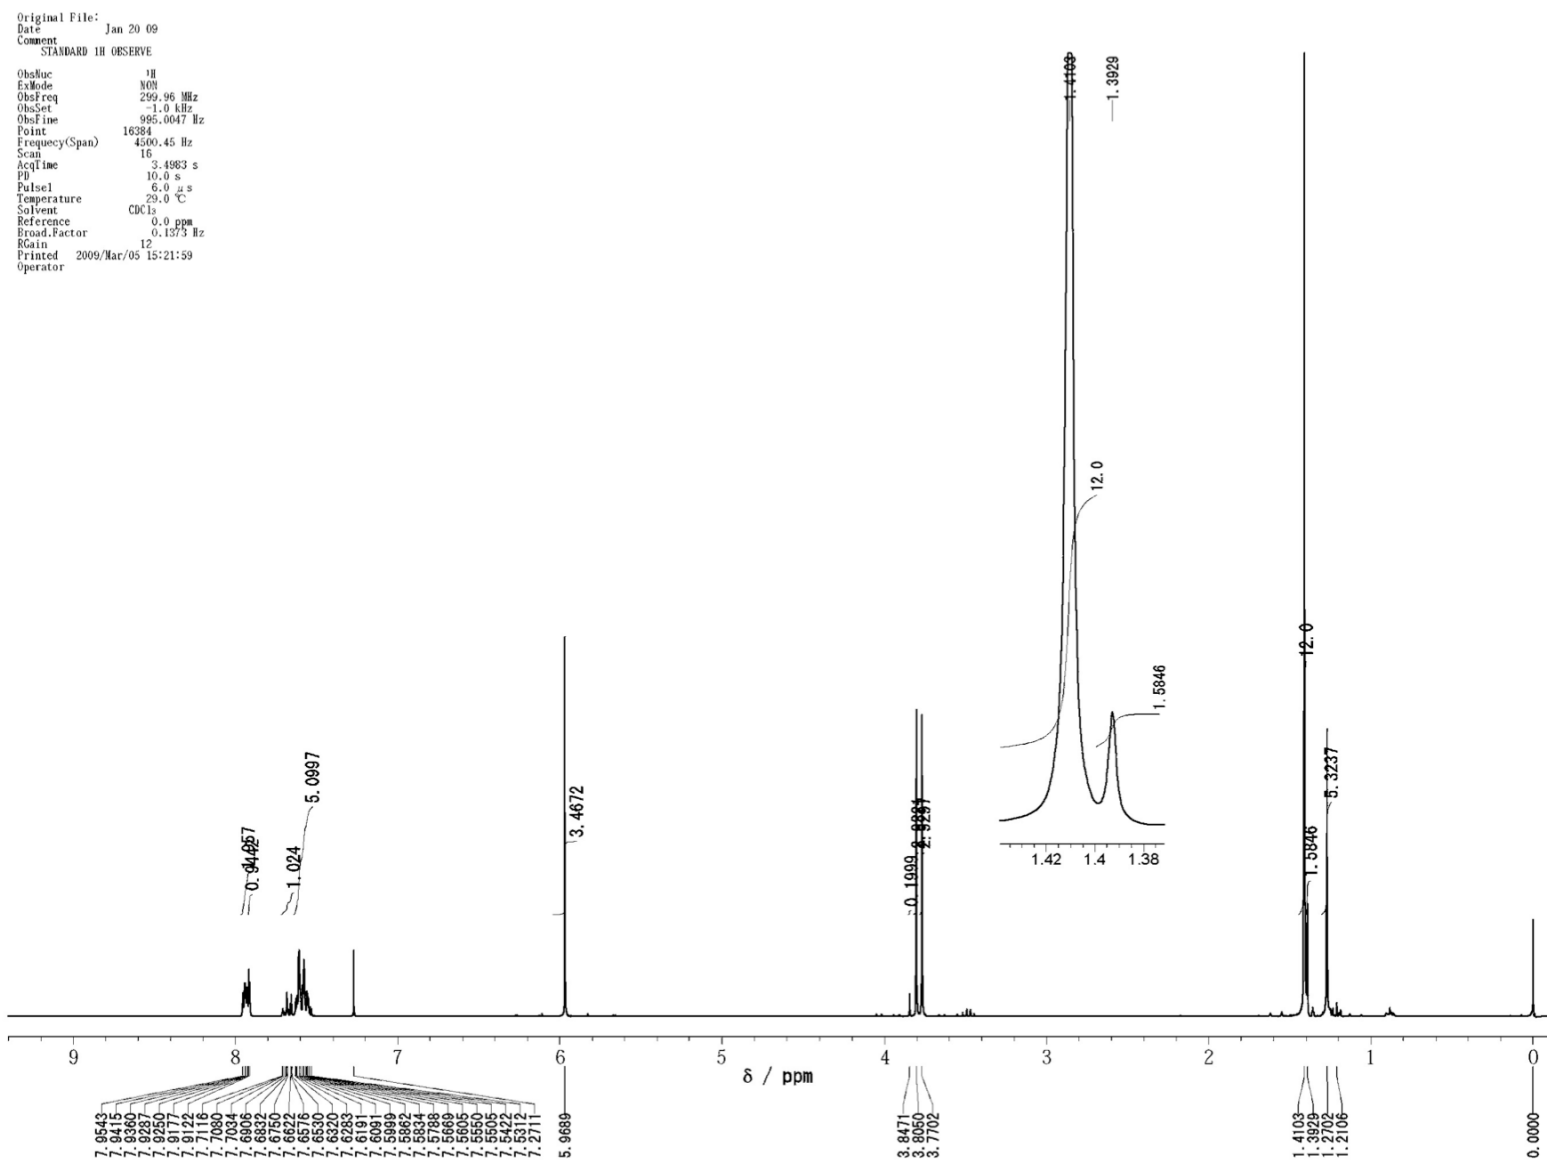

Original File:  
 Date Dec 14 08  
 Comment STANDARD 1H OBSERVE  
 ObsNuc 1H  
 ExMode NON  
 ObsFreq 299.96 MHz  
 ObsSet -1.0 kHz  
 ObsFine 995.0047 Hz  
 Point 16384  
 Frequency(Span) 4500.45 Hz  
 Scan 64  
 AcqTime 3.4983 s  
 PD 1.502 s  
 Pulse 3.0  $\mu$ s  
 Temperature 29.0  $^{\circ}$ C  
 Solvent CDCl<sub>3</sub>  
 Reference 0.0 ppm  
 Broad.Factor 0.1373 Hz  
 RGain 7  
 Printed 2009/Jan/25 23:32:03  
 Operator

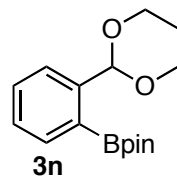

<sup>1</sup>H NMR (CDCl<sub>3</sub>)

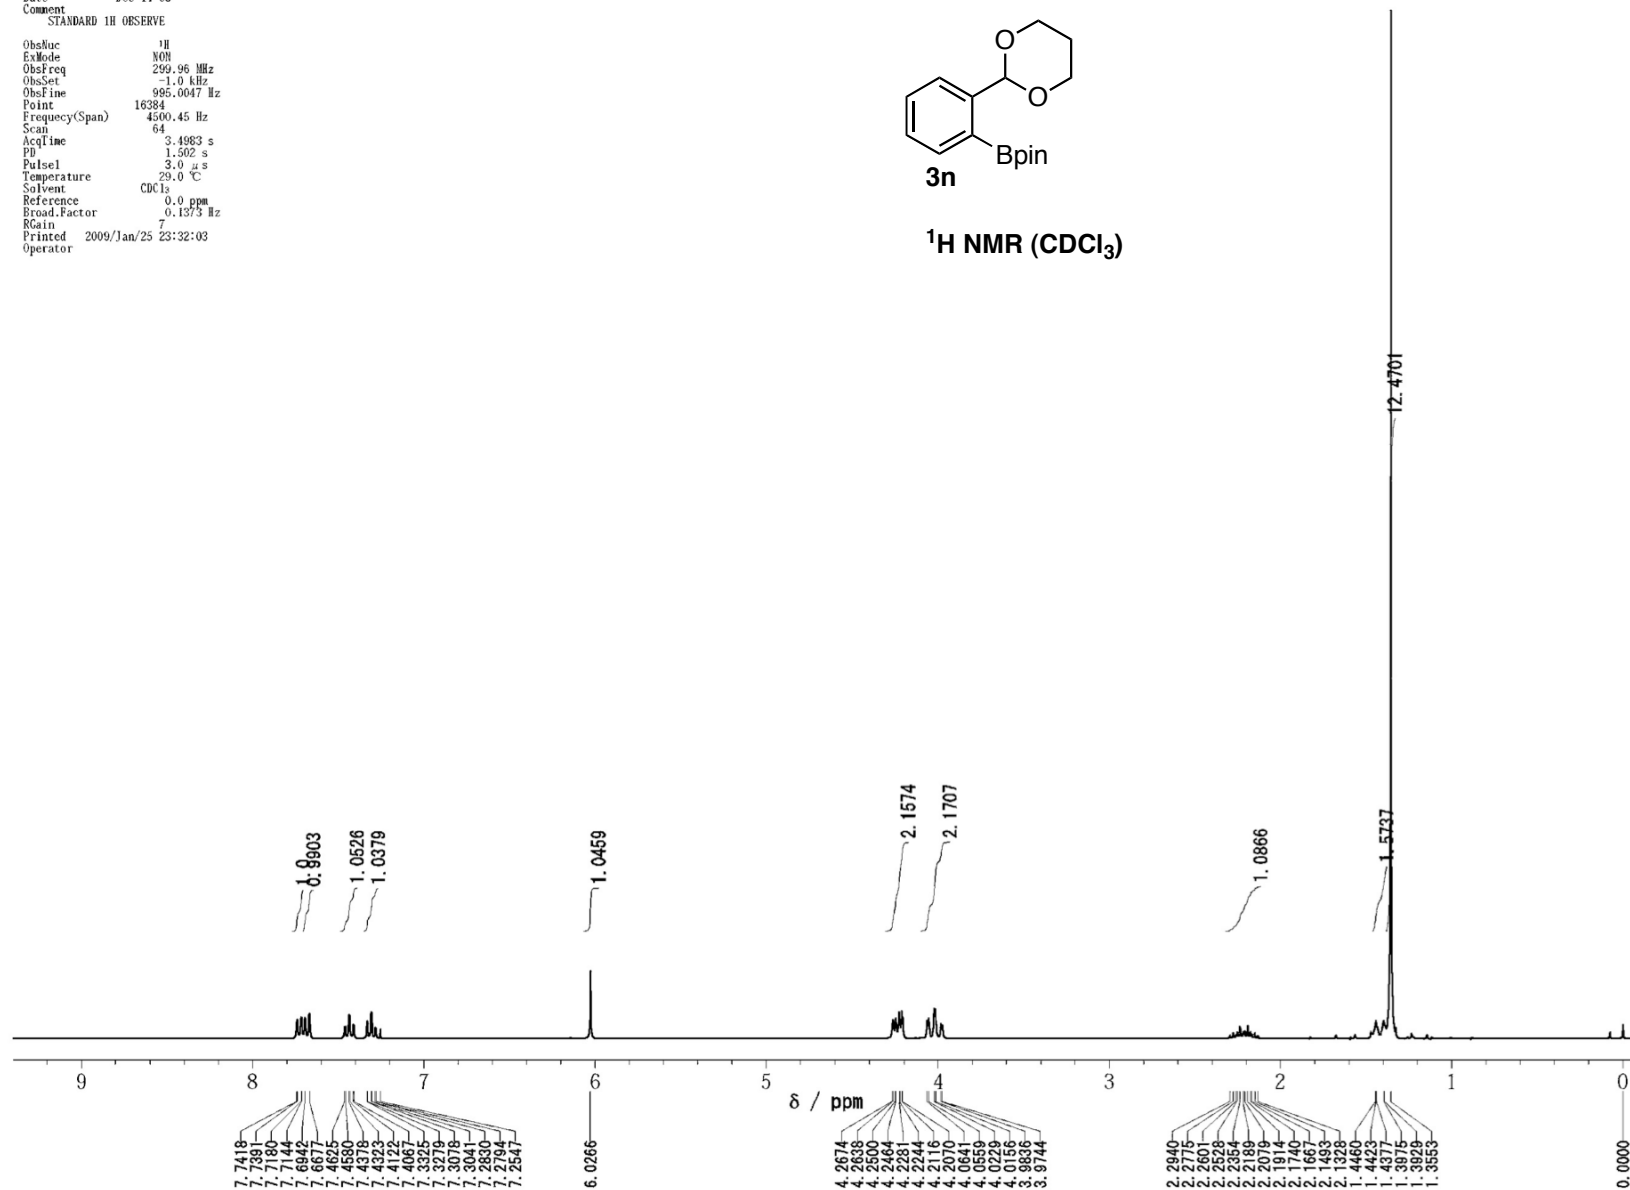

Original File: Dec 14 08  
 Date: Dec 14 08  
 Comment: C13 Standard Observe  
 Stick=none Tune=6.4 Match=0.4  
 ObsNuc: <sup>13</sup>C  
 ExMode: NOH  
 ObsFreq: 75.43 MHz  
 ObsSet: -1.0 kHz  
 ObsFine: 996.3672 Hz  
 Point: 32768  
 Frequency(Span): 18761.73 Hz  
 Scan: 80  
 AcqTime: 1.4992 s  
 PD: 1.501 s  
 Pulse1: 6.0 μs  
 Temperature: 29.0 °C  
 Solvent: CDCl<sub>3</sub>  
 Reference: 77.0 ppm  
 Broad.Factor: 0.2863 Hz  
 RGain: 30  
 Printed: 2009/Jan/25 23:32:43  
 Operator:

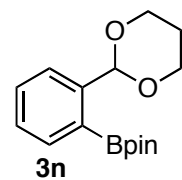

<sup>13</sup>C NMR (CDCl<sub>3</sub>)

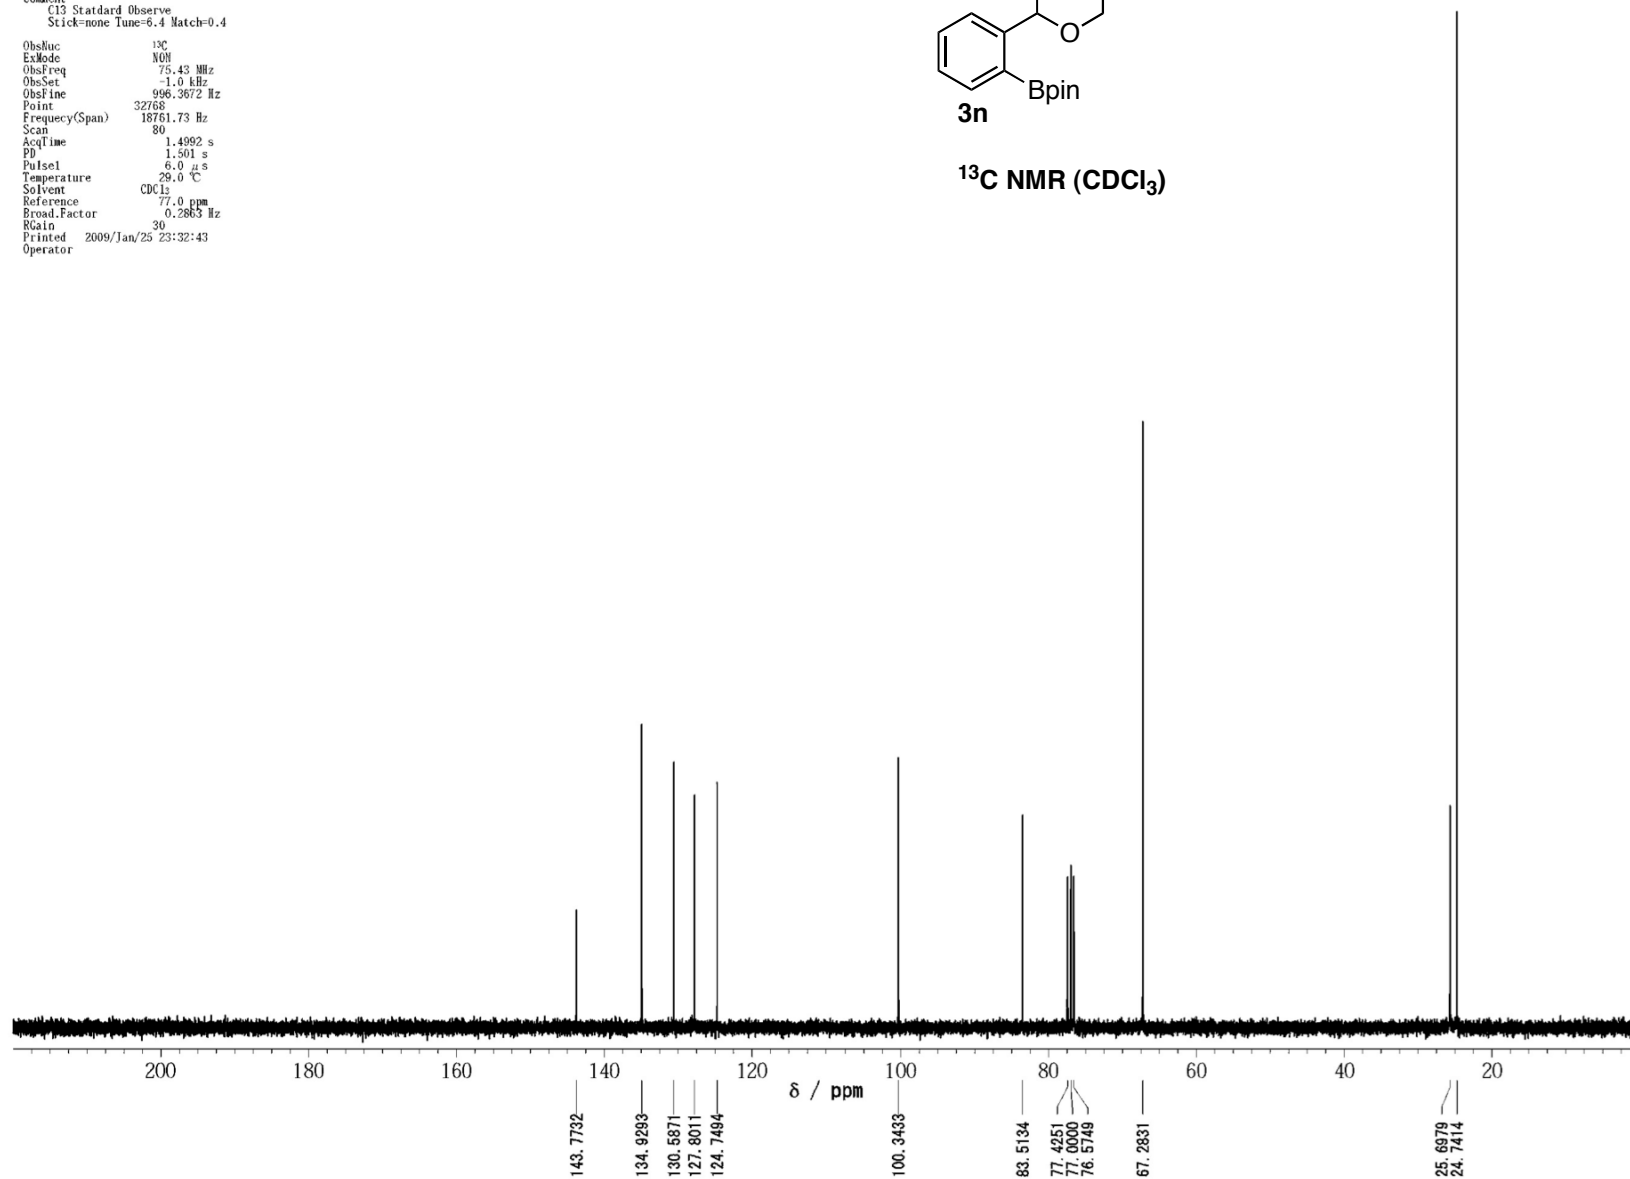

Original File:   
 Date: Dec 15 08   
 Comment: STANDARD 1H OBSERVE   
 ObsNuc: 1H   
 ExMode: NON   
 ObsFreq: 299.96 MHz   
 ObsSet: -1.0 kHz   
 ObsFine: 995.0047 Hz   
 Point: 16384   
 Frequency(Span): 4500.45 Hz   
 Scan: 64   
 AcqTime: 3.4983 s   
 PD: 1.502 s   
 Pulse1: 6.0  $\mu$ s   
 Temperature: 29.0  $^{\circ}$ C   
 Solvent: CDCl<sub>3</sub>   
 Reference: 0.0 ppm   
 Broad.Factor: 0.1373 Hz   
 RGain: 30   
 Printed: 2009/Mar/05 15:26:14   
 Operator:

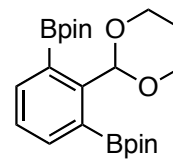

<sup>1</sup>H NMR (CDCl<sub>3</sub>)

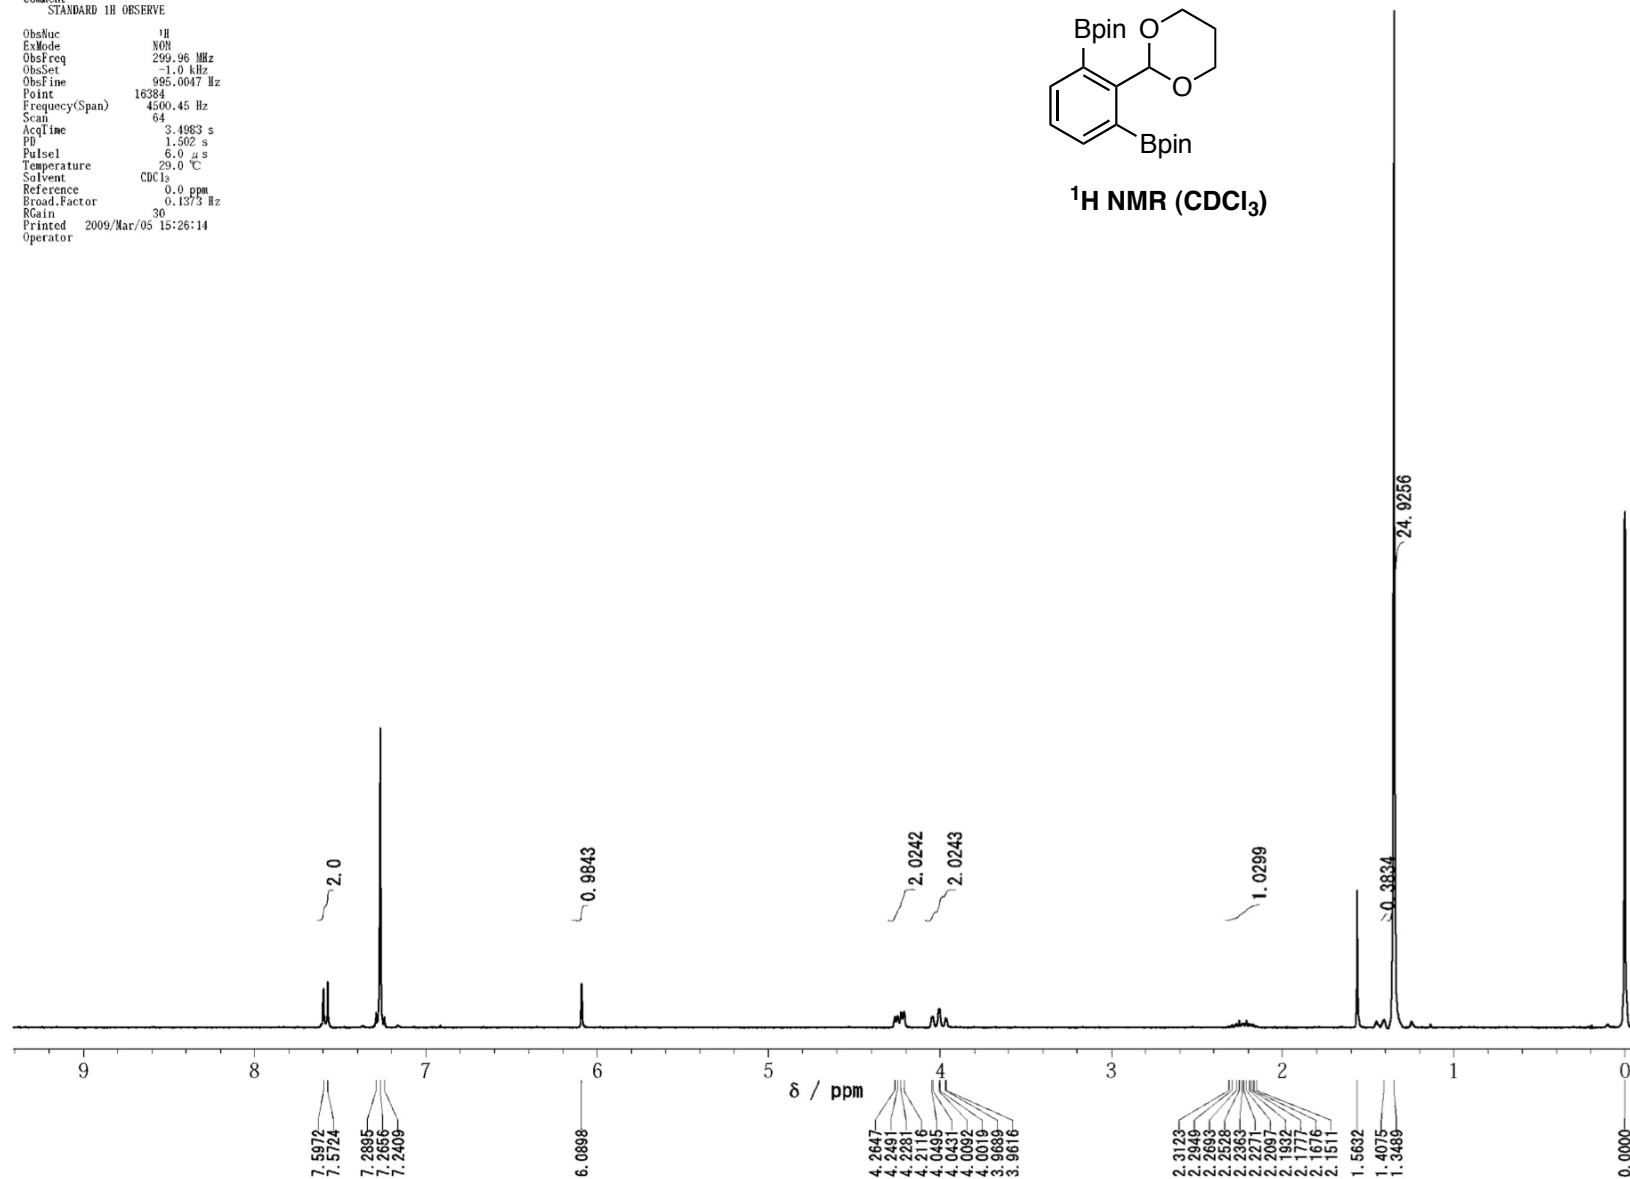

Original File:   
 Date: Oct 15 08   
 Comment: STANDARD 1H OBSERVE   
 ObsNuc: 1H   
 ExMode: NON   
 ObsFreq: 299.96 MHz   
 ObsSet: -1.0 kHz   
 ObsFine: 995.0047 Hz   
 Point: 16384   
 Frequency(Span): 4500.45 Hz   
 Scan: 16   
 AcqTime: 3.4983 s   
 PD: 1.502 s   
 Pulse1: 6.0  $\mu$ s   
 Temperature: 29.0  $^{\circ}$ C   
 Solvent: CDCl<sub>3</sub>   
 Reference: 0.0 ppm   
 Broad.Factor: 0.1373 Hz   
 RGain: 24   
 Printed: 2009/Jan/25 23:33:33   
 Operator:

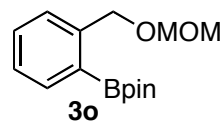

<sup>1</sup>H NMR (CDCl<sub>3</sub>)

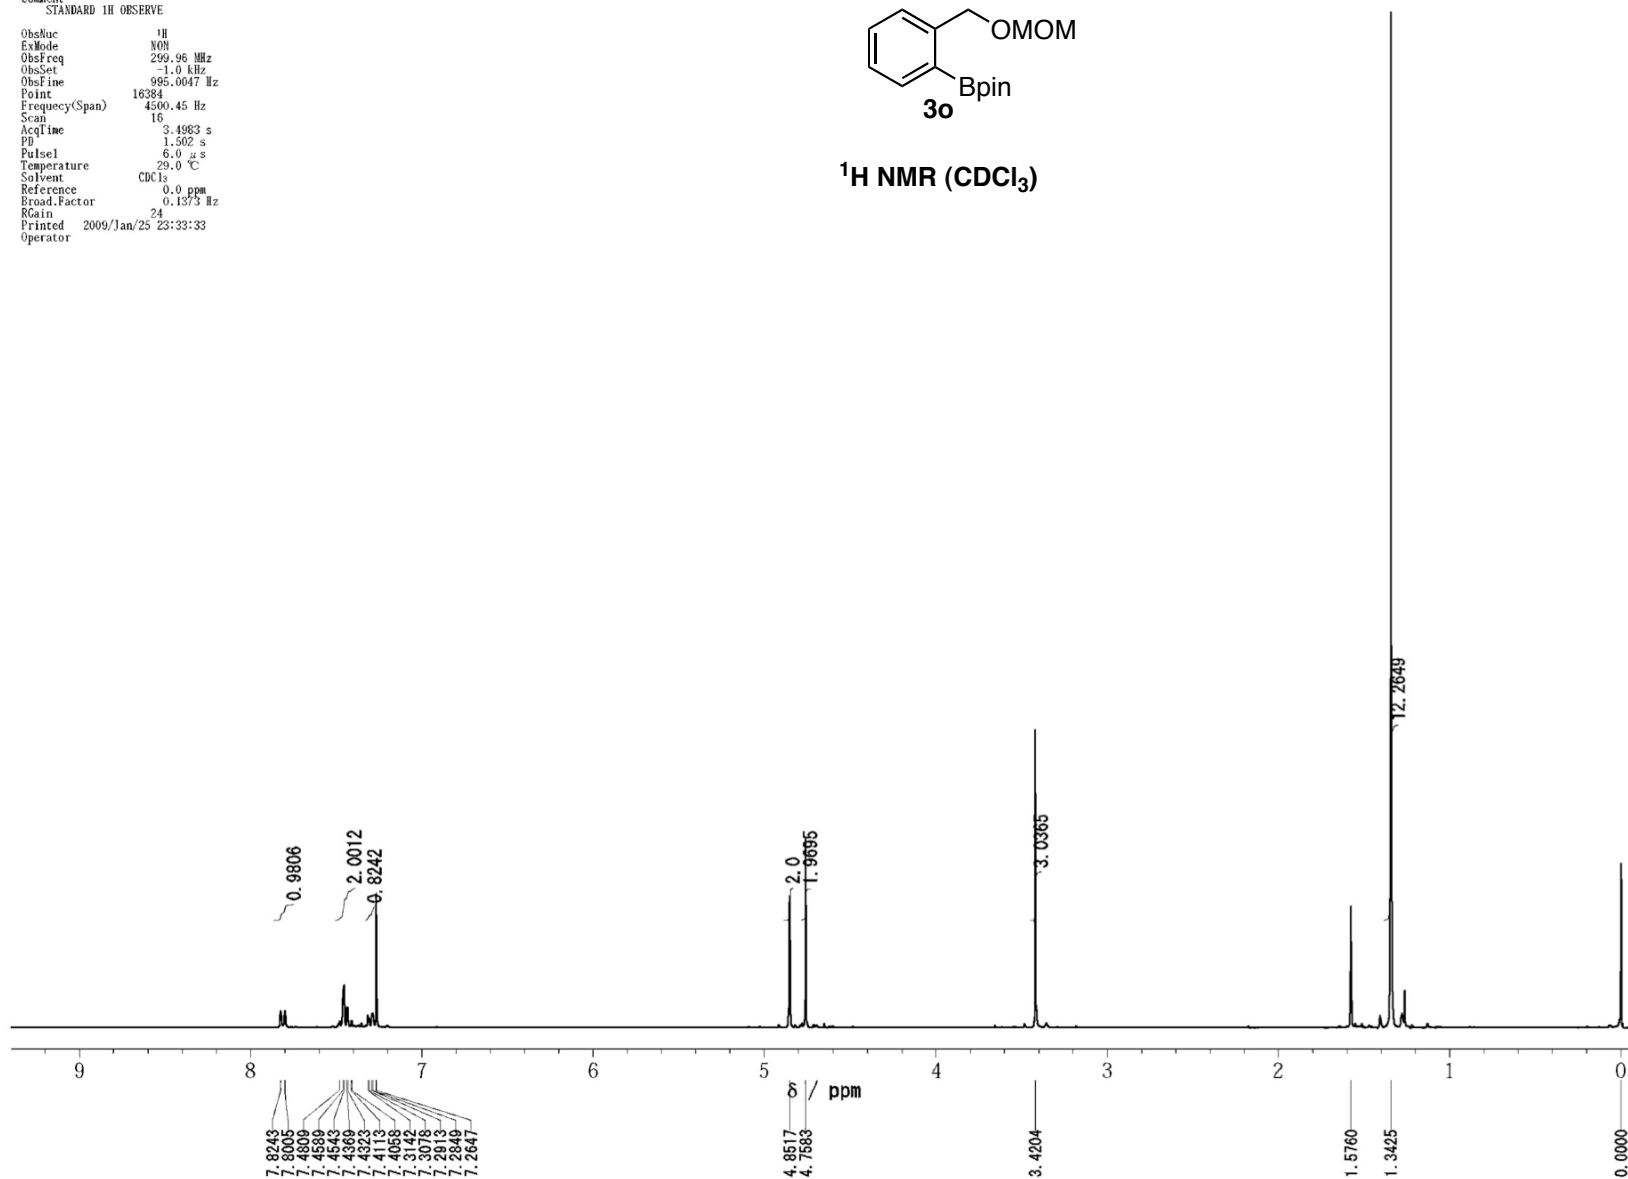

Original File:  
 Date Oct 15 08  
 Comment C13 Standard Observe  
 Stick=none Tune=6.4 Match=0.4  
 ObsNuc <sup>13</sup>C  
 ExMode NOH  
 ObsFreq 75.43 MHz  
 ObsSet -1.0 kHz  
 ObsFine 996.3672 Hz  
 Point 32768  
 Frequency(Span) 18761.73 Hz  
 Scan 360  
 AcqTime 1.4992 s  
 PD 1.501 s  
 Pulse1 6.0 μs  
 Temperature 29.0 °C  
 Solvent CDCl<sub>3</sub>  
 Reference 77.0 ppm  
 Broad.Factor 0.2863 Hz  
 RGain 30  
 Printed 2009/Jan/25 23:34:09  
 Operator

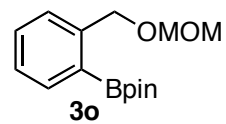

<sup>13</sup>C NMR (CDCl<sub>3</sub>)

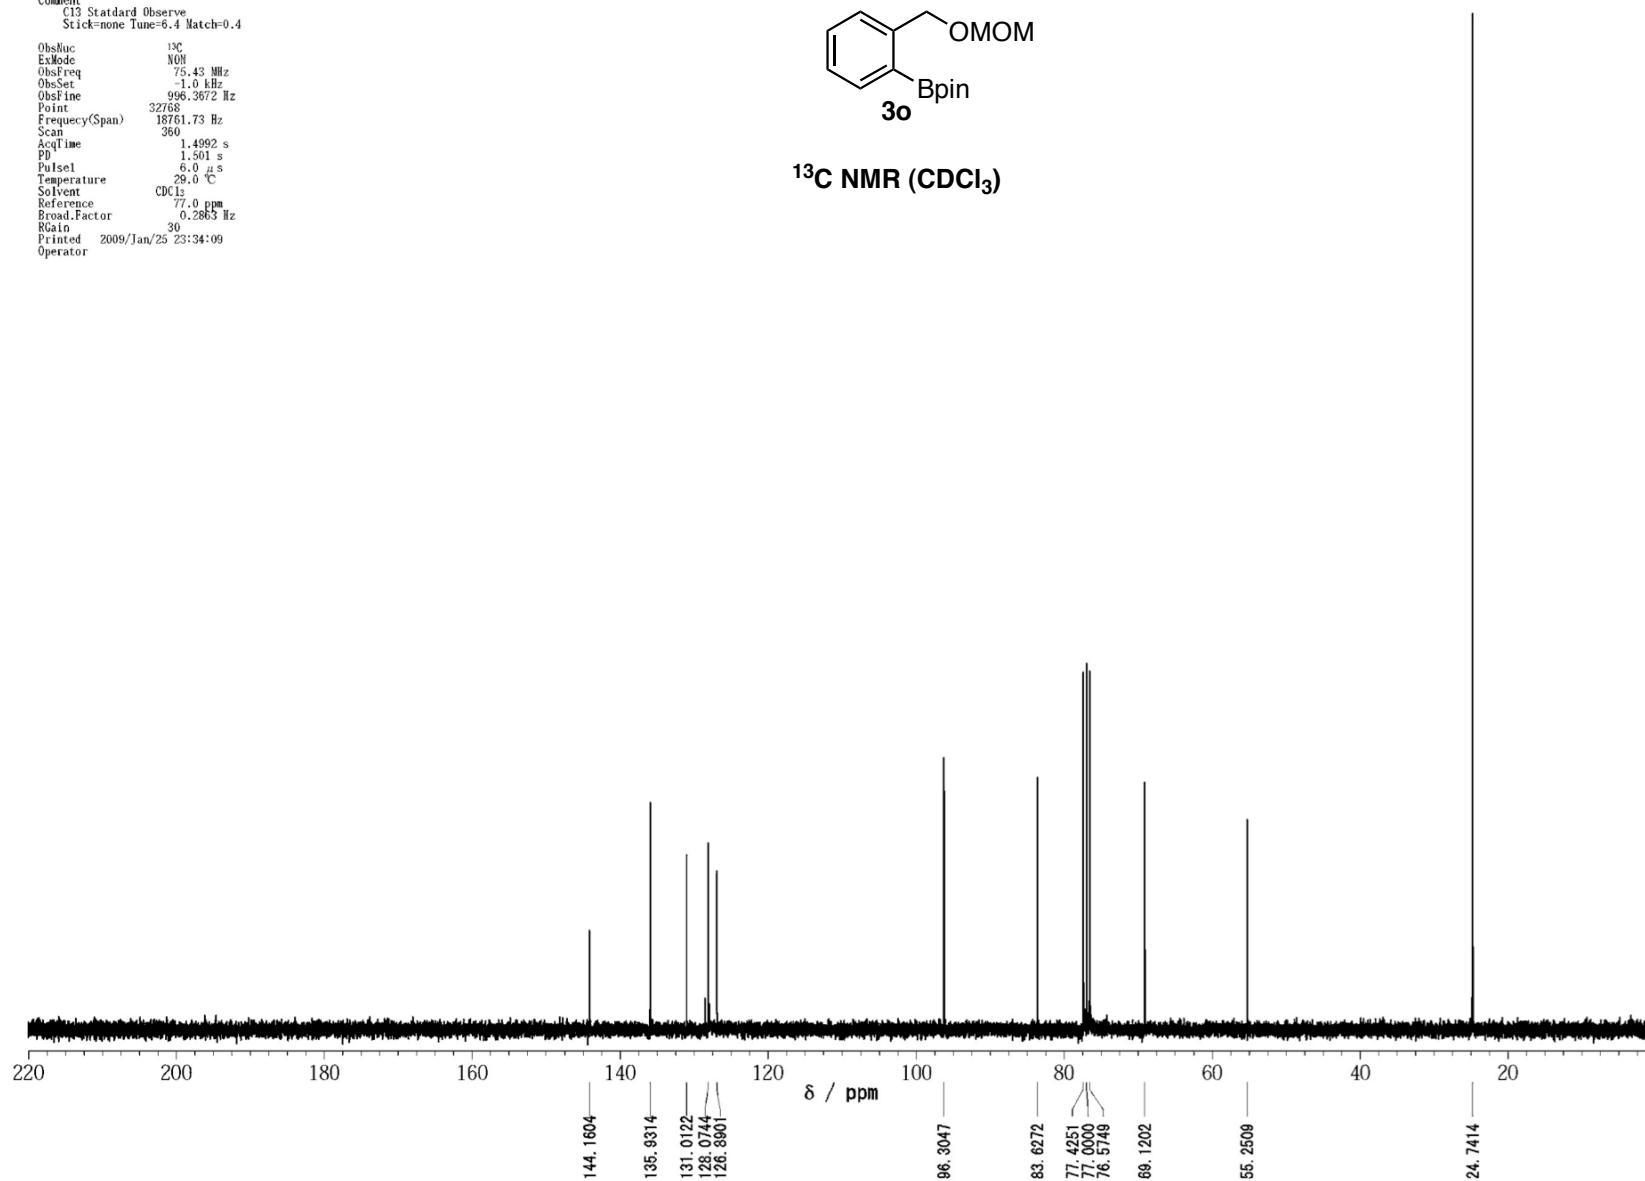

Original File: Nov 11 08  
 Date: Nov 11 08  
 Comment: STANDARD 1H OBSERVE  
 ObsNuc: 1H  
 ExMode: NON  
 ObsFreq: 299.96 MHz  
 ObsSet: -1.0 kHz  
 ObsFine: 995.0047 Hz  
 Point: 16384  
 Frequency(Span): 4500.45 Hz  
 Scan: 16  
 AcqTime: 3.4983 s  
 PD: 1.502 s  
 Pulse1: 6.0  $\mu$ s  
 Temperature: 29.0  $^{\circ}$ C  
 Solvent: CDCl<sub>3</sub>  
 Reference: 0.0 ppm  
 Broad.Factor: 0.1373 Hz  
 RGain: 18  
 Printed: 2009/Mar/05 15:05:24  
 Operator:

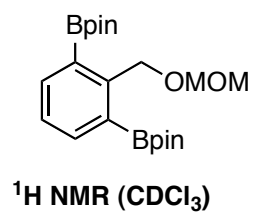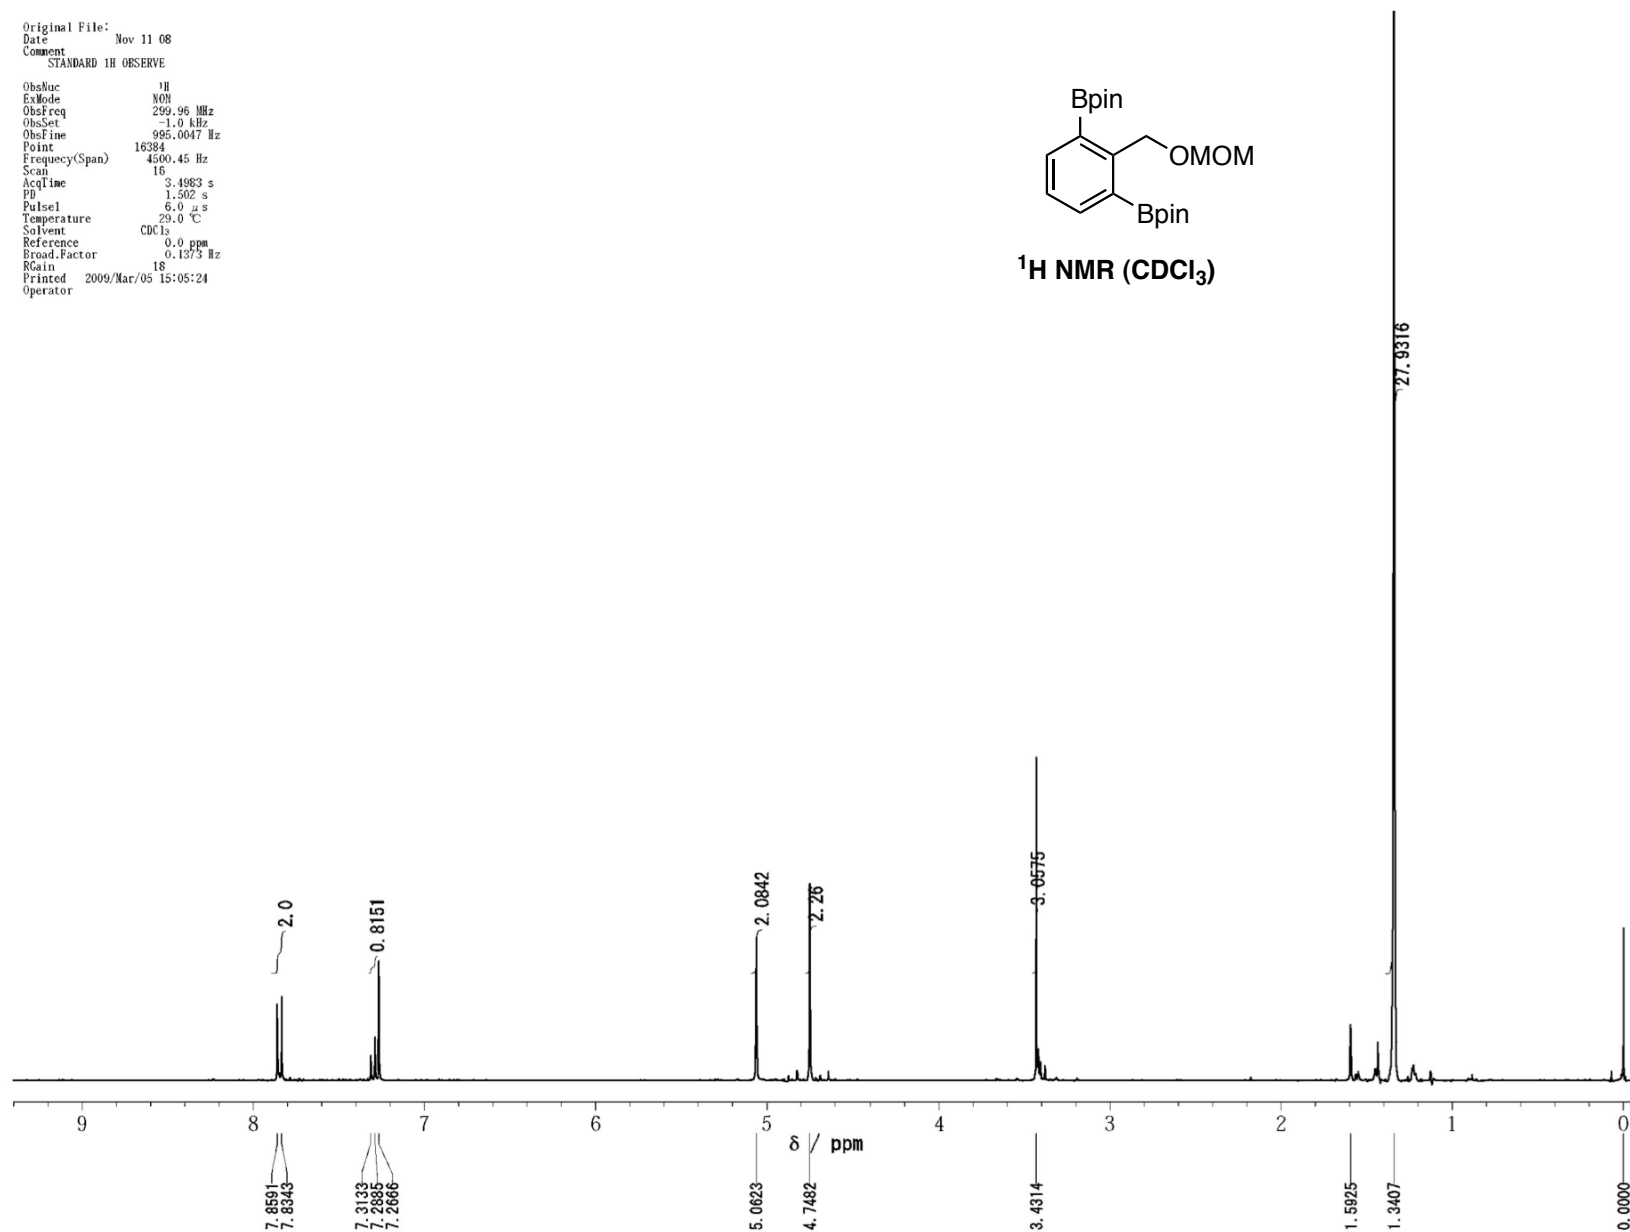

Original File:  
 Date Jan 10 09  
 Comment STANDARD 1H OBSERVE  
 ObsNuc 1H  
 ExMode NON  
 ObsFreq 299.96 MHz  
 ObsSet -1.0 kHz  
 ObsFine 995.0047 Hz  
 Point 16384  
 Frequency(Span) 4500.45 Hz  
 Scan 16  
 AcqTime 3.4983 s  
 PD 1.502 s  
 Pulse 6.0  $\mu$ s  
 Temperature 29.0  $^{\circ}$ C  
 Solvent CDCl<sub>3</sub>  
 Reference 0.0 ppm  
 Broad.Factor 0.1373 Hz  
 RGain 20  
 Printed 2009/Jan/26 09:24:04  
 Operator

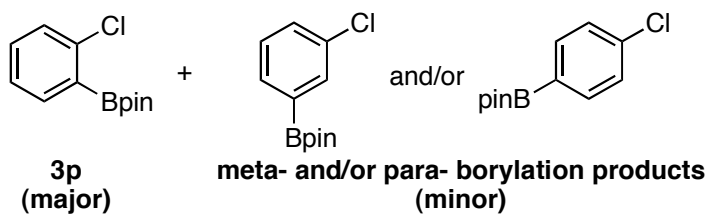

ratio of  $\alpha/(m+p) = 92:8$

<sup>1</sup>H NMR (CDCl<sub>3</sub>)

● peaks: 3p

○ peaks: meta- and/or para- borylation products

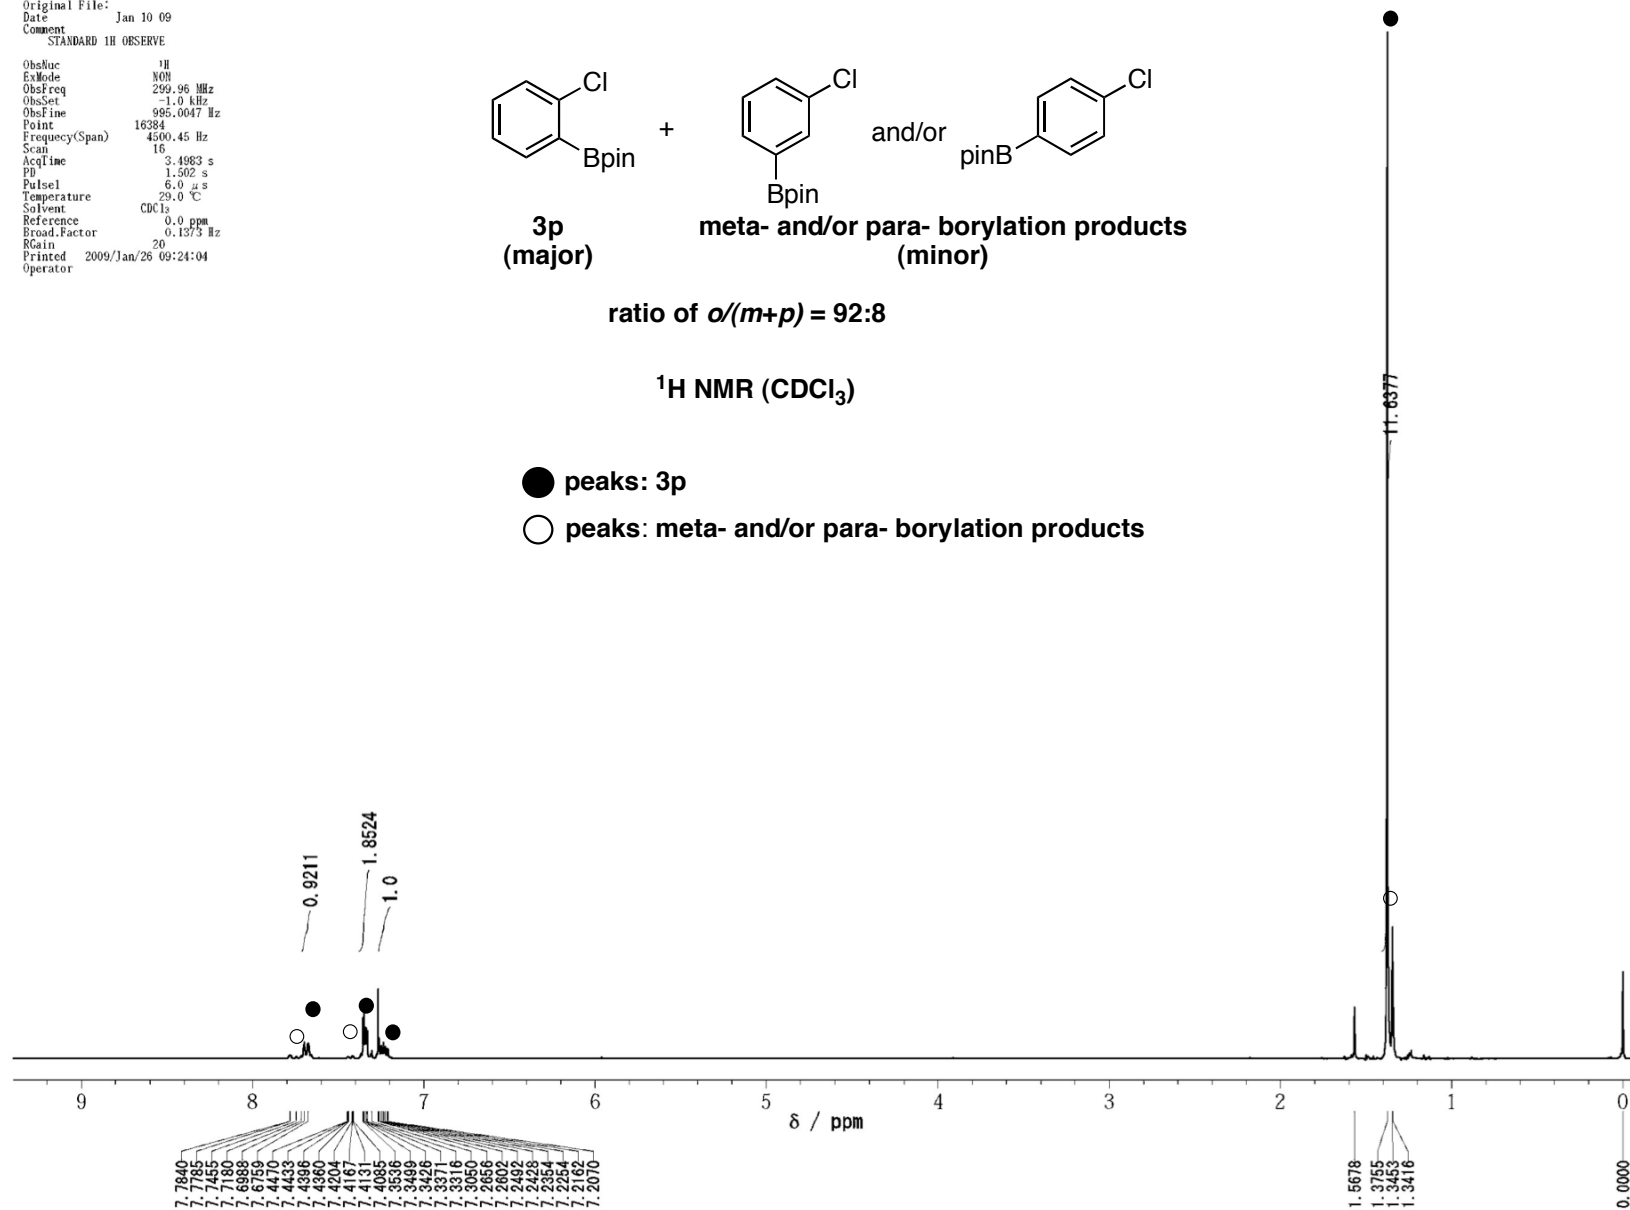



Original File:  
 Date Jan 26 09  
 Comment C13 Standard Observe  
 Stick=none Tune=6.4 Match=0.4  
 ObsNuc <sup>13</sup>C  
 ExMode NOH  
 ObsFreq 75.43 MHz  
 ObsSet -1.0 kHz  
 ObsFine 996.3672 Hz  
 Point 32768  
 Frequency(Span) 18761.73 Hz  
 Scan 32  
 AcqTime 1.4992 s  
 PD 1.501 s  
 Pulse1 6.0 μs  
 Temperature 29.0 °C  
 Solvent CDCl<sub>3</sub>  
 Reference 77.0 ppm  
 Broad.Factor 0.2863 Hz  
 RGain 30  
 Printed 2009/Jan/27 19:39:27  
 Operator

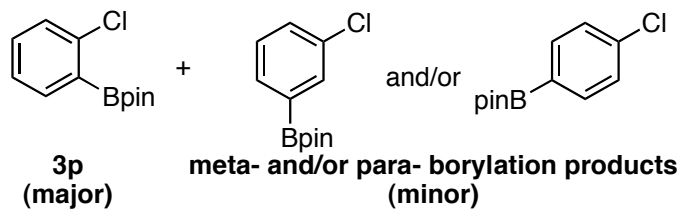

ratio of *o*/(*m*+*p*) = 92:8

<sup>13</sup>C NMR (CDCl<sub>3</sub>)

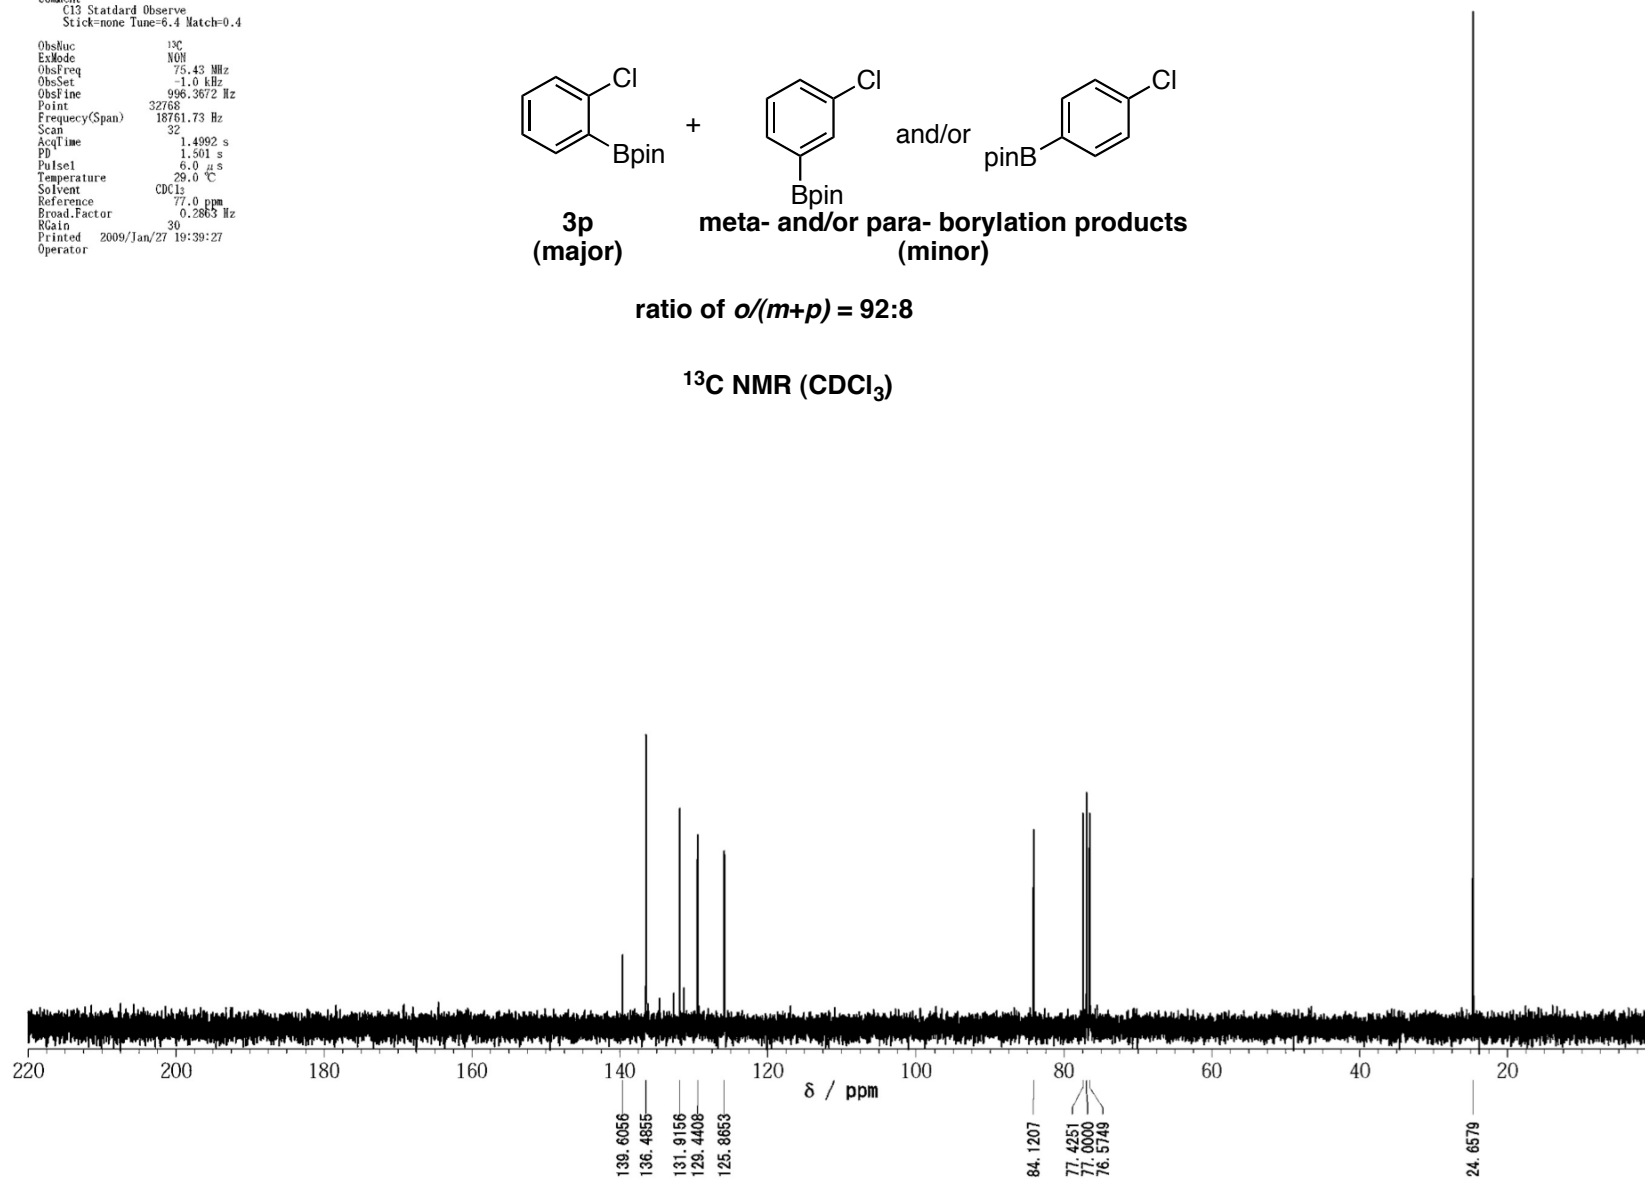

**$^1\text{H}$  NMR spectrum of the crude material on a reaction of 1p (Table 2, entry 6)**

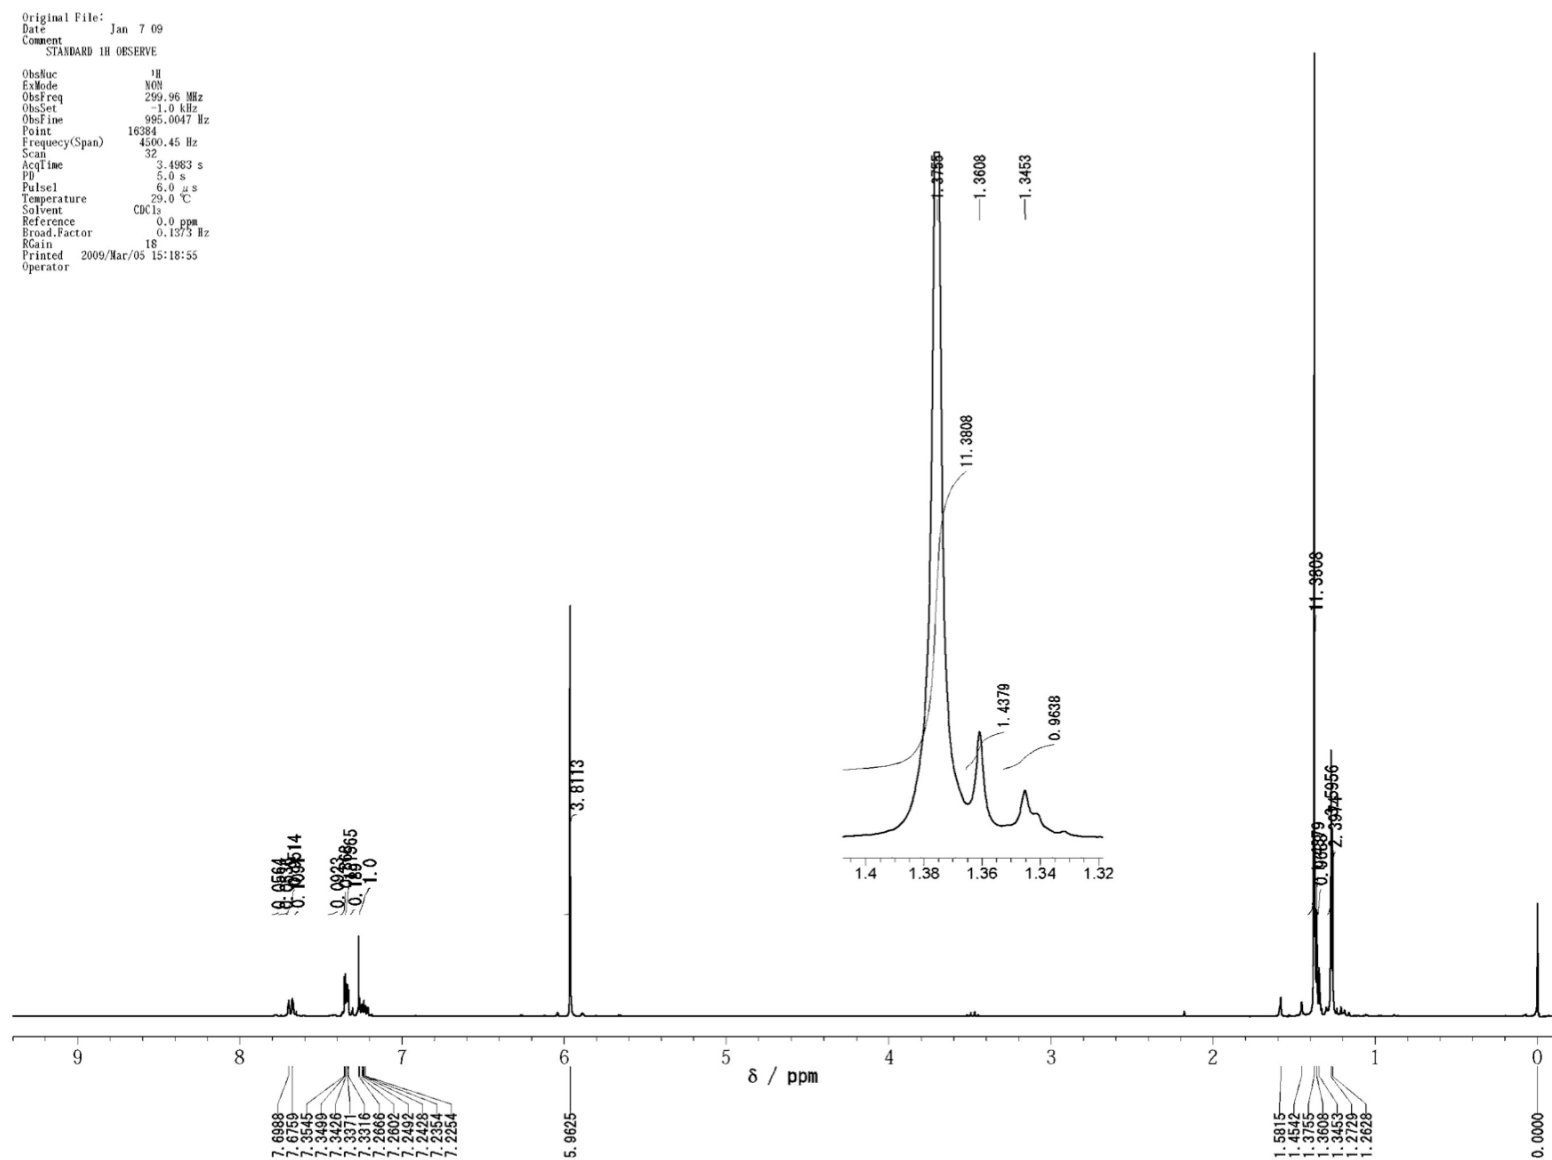

Original File:  
 Date Jan 23 09  
 Comment STANDARD 1H OBSERVE  
 ObsNuc 1H  
 ExMode NON  
 ObsFreq 299.96 MHz  
 ObsSet -1.0 kHz  
 ObsFine 995.0047 Hz  
 Point 16384  
 Frequency(Span) 4500.45 Hz  
 Scan 16  
 AcqTime 3.4983 s  
 PD 1.502 s  
 Pulse1 6.0  $\mu$ s  
 Temperature 29.0  $^{\circ}$ C  
 Solvent CDCl<sub>3</sub>  
 Reference 0.0 ppm  
 Broad.Factor 0.1373 Hz  
 RGain 18  
 Printed 2009/Jan/25 23:34:56  
 Operator

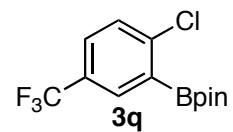

<sup>1</sup>H NMR (CDCl<sub>3</sub>)

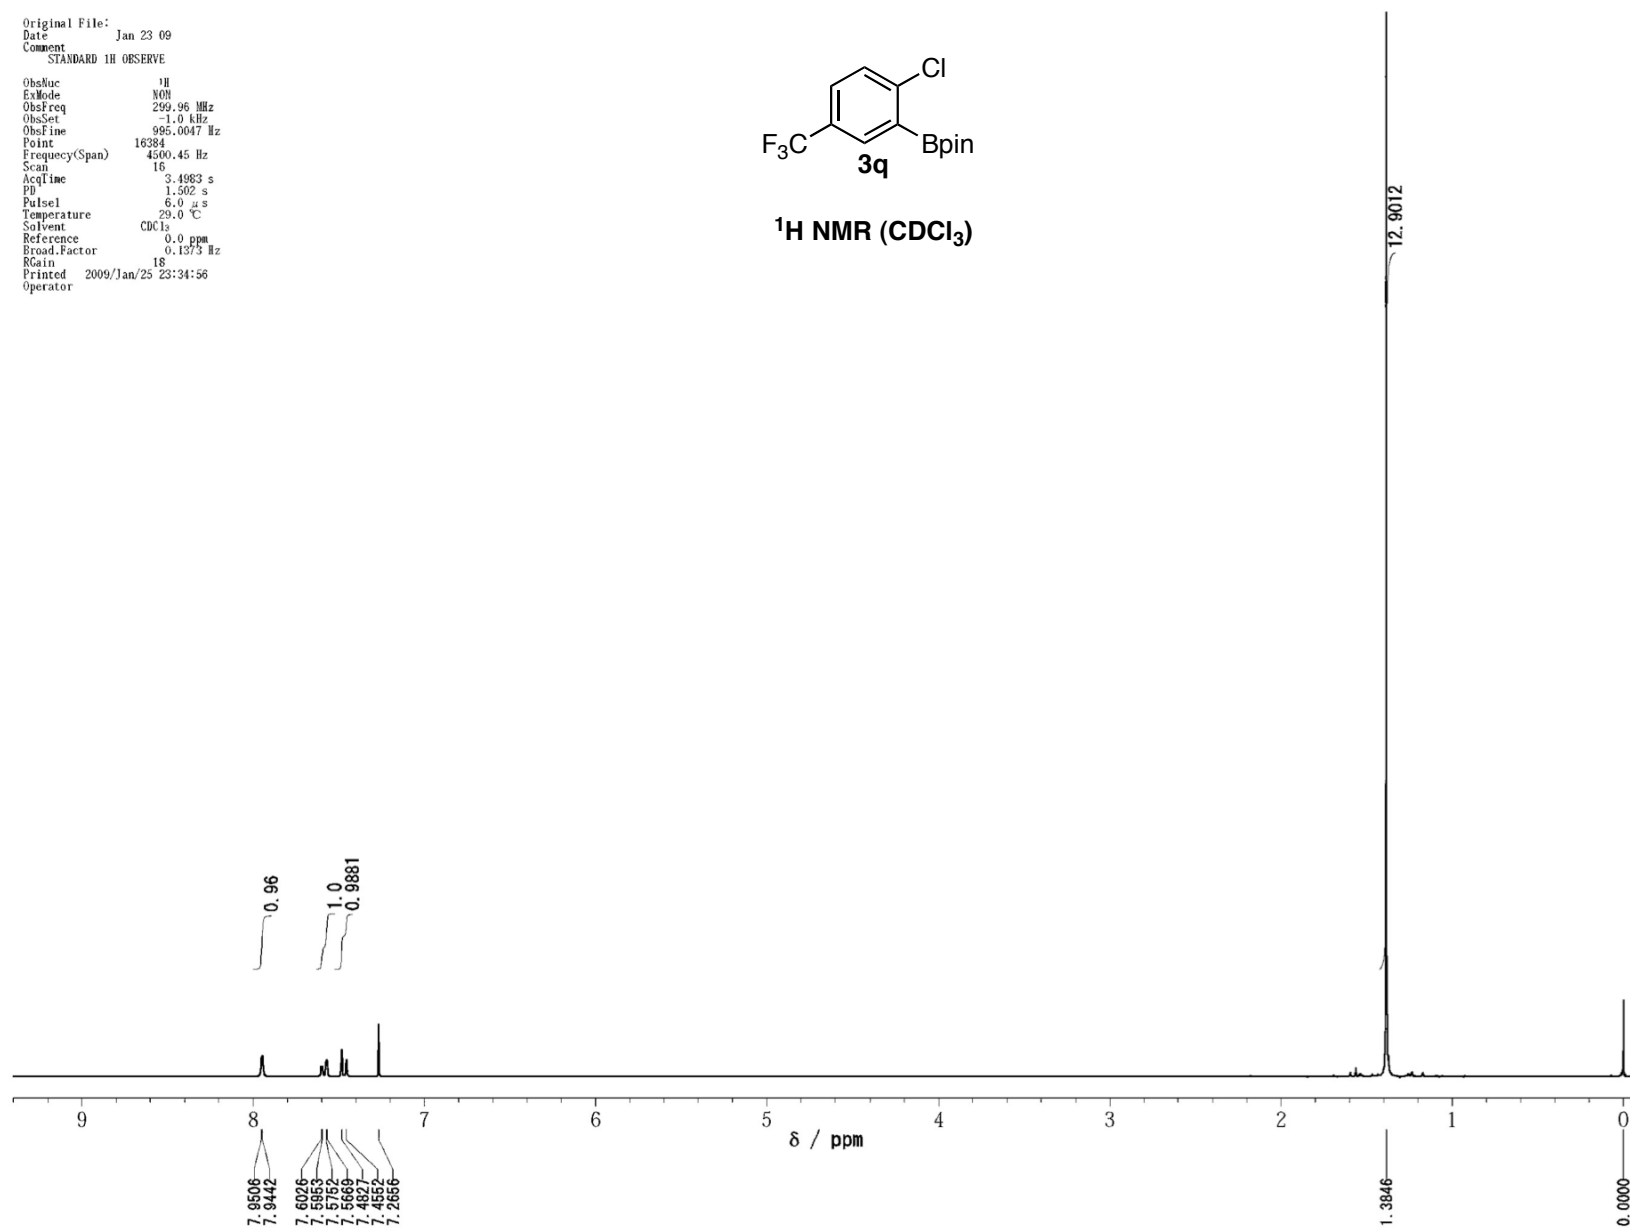

File C:\DOCUMENTS AND SETTINGS\北海道大学\MY DOCUMENTS\DELL NMR データ 0601\KAWAMORITA\SK694-13C.FID\FID(S).ALS  
Original File: C:\DOCUMENTS AND SETTINGS\北海道大学\MY DOCUMENTS\DELL NMR データ 0601\KAWAMORITA\SK694-13C.FID\FID(S).ALS

Date Jan 26 09  
Comment C13 Standard Observe  
Stick=none Tune=6.4 Match=0.4

ObsNuc <sup>13</sup>C  
ExMode NON  
ObsFreq 75.43 MHz  
ObsSet -1.0 kHz  
ObsFine 996.3672 Hz  
Point 32768  
Frequency(Span) 18761.73 Hz  
Scan 10000  
AcqTime 1.4992 s  
PD 1.501 s  
Pulse1 6.0  $\mu$ s  
Temperature 29.0  $^{\circ}$ C  
Solvent CDCl<sub>3</sub>  
Reference 77.0 ppm  
Broad.Factor 0.25 Hz  
RGain 30  
Printed 2009/Jan/26 09:17:46  
Operator

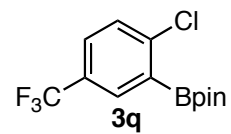

<sup>13</sup>C NMR (CDCl<sub>3</sub>)

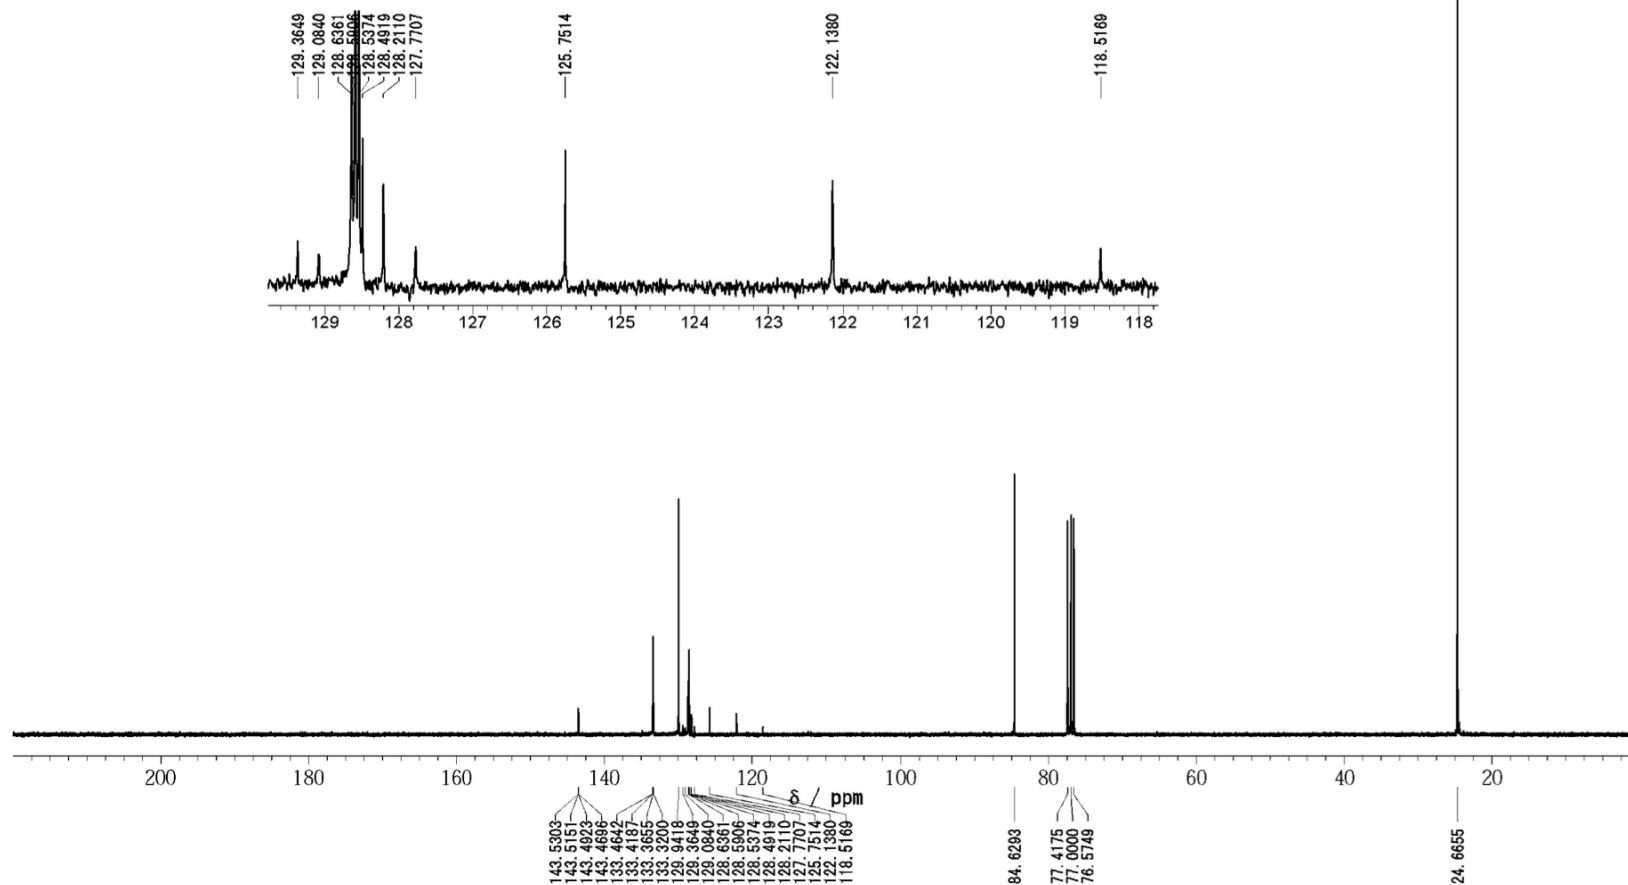

**$^1\text{H}$  NMR spectrum of the crude material on a reaction of 1q (Table 2, entry 7)**

Original File:  
 Date Jan 22 09  
 Comment  
 STANDARD  $^1\text{H}$  OBSERVE  
 ObsMod  $^1\text{H}$   
 ExMode NON  
 ObsFreq 299.96 MHz  
 ObsSet -1.0 kHz  
 ObsFine 995.0047 Hz  
 Point 16384  
 Frequency(Span) 4500.45 Hz  
 Scan 16  
 AcqTime 3.4983 s  
 PU 10.0 s  
 Pulse1 6.0  $\mu$ s  
 Temperature 29.0  $^{\circ}\text{C}$   
 Solvent  $\text{CDCl}_3$   
 Reference 0.0 ppm  
 Broad.Factor 0.1373 Hz  
 RGain 24  
 Printed 2009/Mar/05 16:12:41  
 Operator

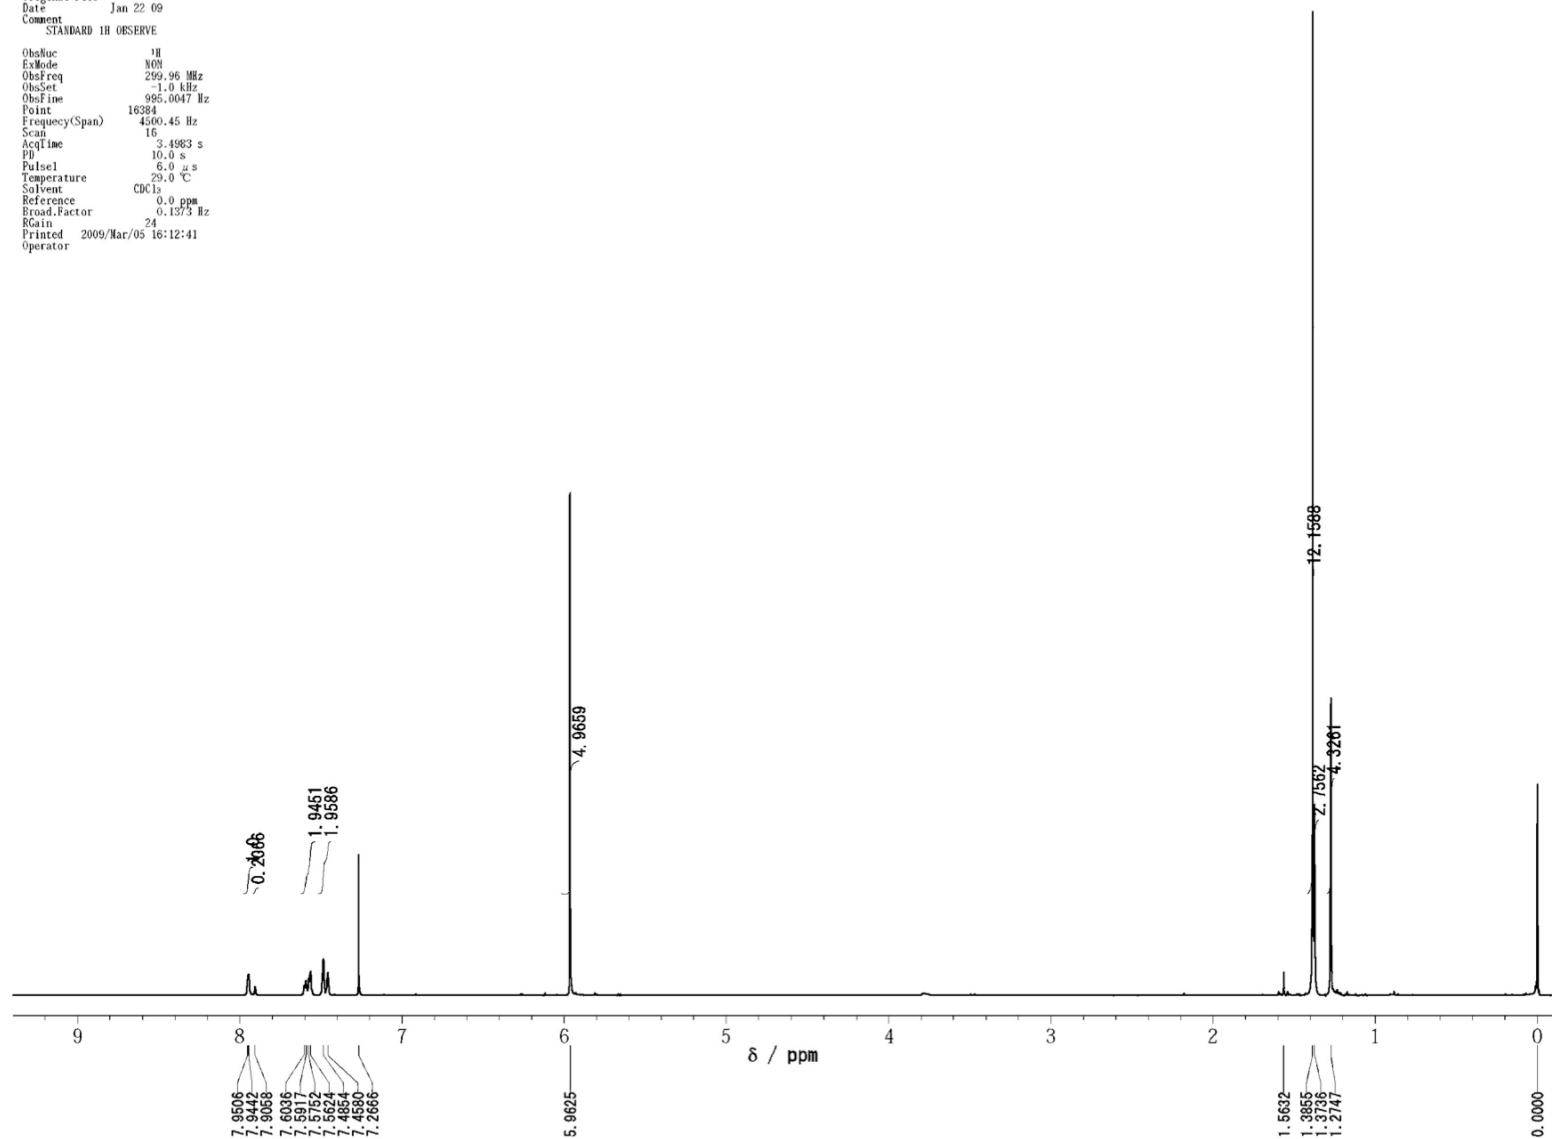

Original File:   
 Date: Oct 16 08   
 Comment: STANDARD 1H OBSERVE   
 ObsNuc: 1H   
 ExMode: NON   
 ObsFreq: 299.96 MHz   
 ObsSet: -1.0 kHz   
 ObsFine: 995.0047 Hz   
 Point: 16384   
 Frequency(Span): 4500.45 Hz   
 Scan: 16   
 AcqTime: 3.4983 s   
 PD: 1.502 s   
 Pulse1: 6.0  $\mu$ s   
 Temperature: 29.0  $^{\circ}$ C   
 Solvent: CDCl<sub>3</sub>   
 Reference: 0.0 ppm   
 Broad.Factor: 0.1373 Hz   
 RGain: 18   
 Printed: 2009/Jan/25 23:35:37   
 Operator:

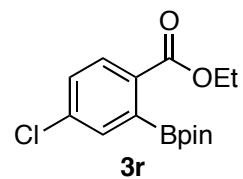

**<sup>1</sup>H NMR (CDCl<sub>3</sub>)**

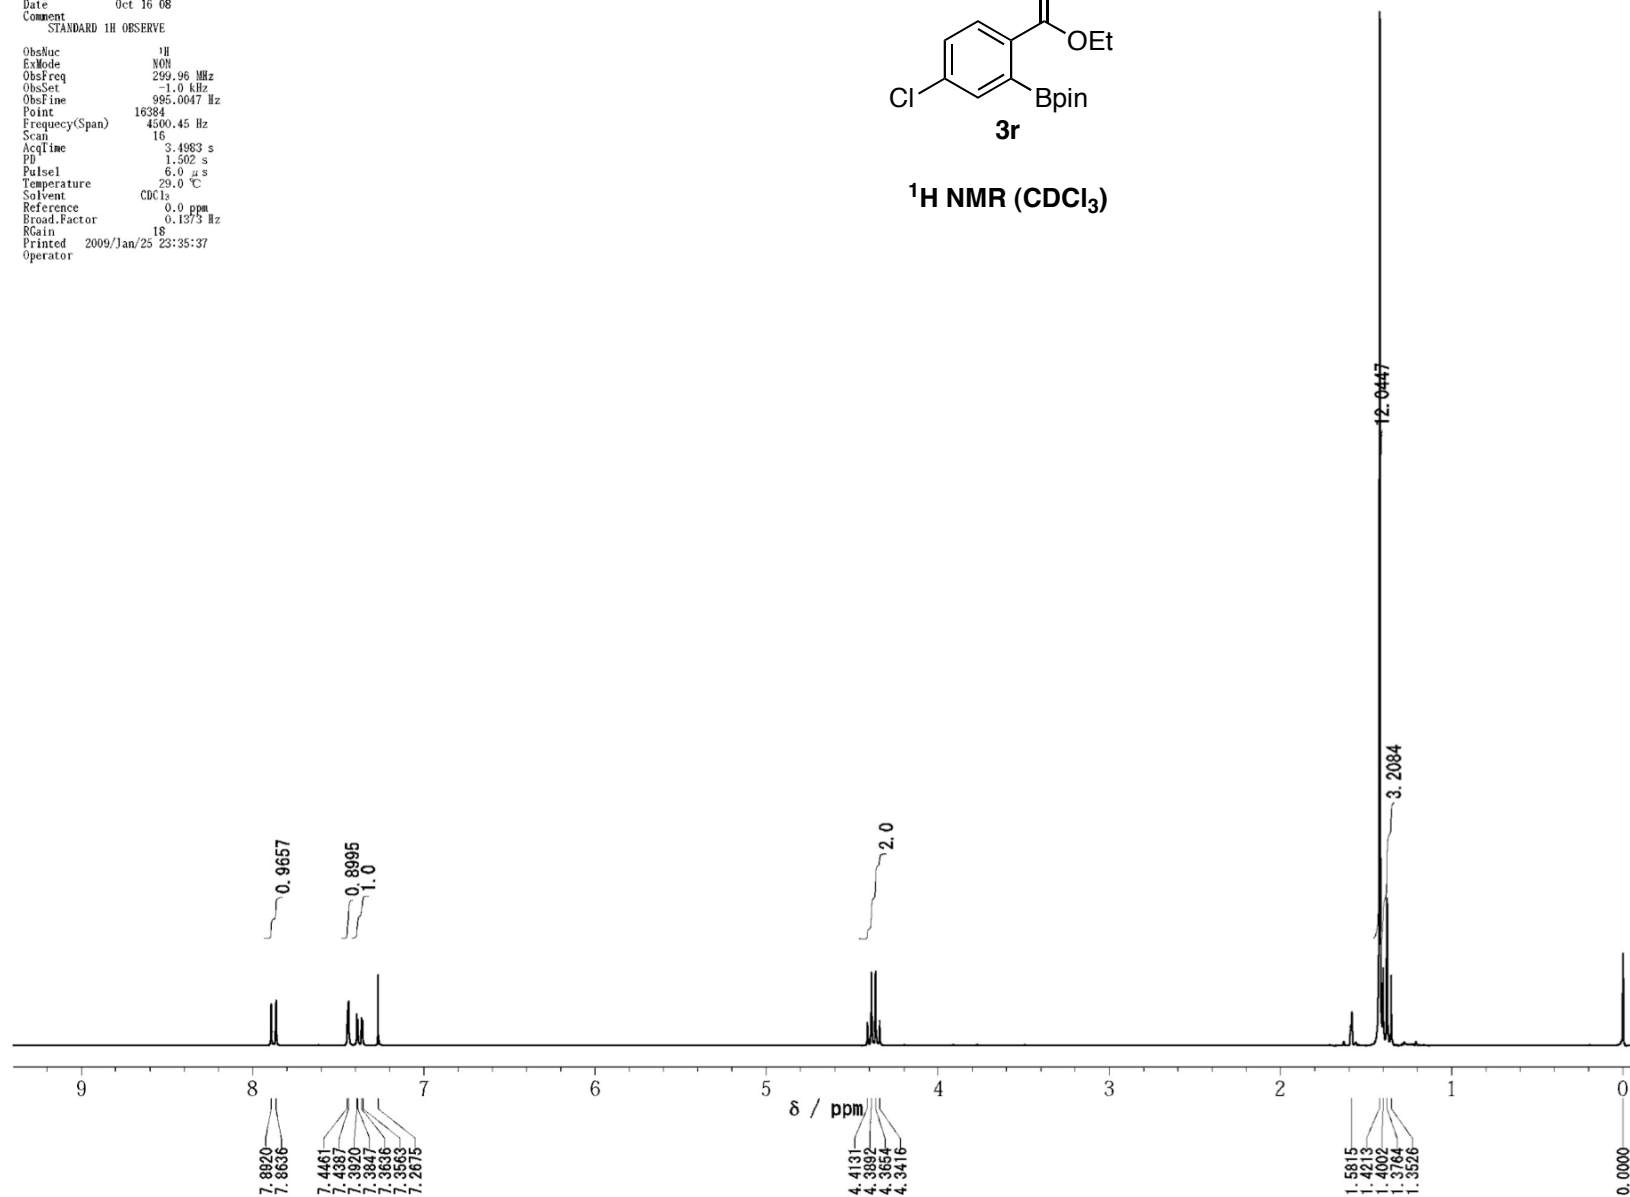

Original File:  
 Date Oct 16 08  
 Comment C13 Standard Observe  
 Stick=none Tune=6.4 Match=0.4  
 ObsNuc <sup>13</sup>C  
 ExMode NOH  
 ObsFreq 75.43 MHz  
 ObsSet -1.0 kHz  
 ObsFine 996.3672 Hz  
 Point 32768  
 Frequency(Span) 18761.73 Hz  
 Scan 272  
 AcqTime 1.4992 s  
 PD 1.501 s  
 Pulse1 6.0 μs  
 Temperature 29.0 °C  
 Solvent CDCl<sub>3</sub>  
 Reference 77.0 ppm  
 Broad.Factor 0.2863 Hz  
 RGain 30  
 Printed 2009/Jan/25 23:36:13  
 Operator

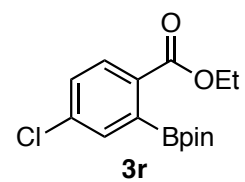

**<sup>13</sup>C NMR (CDCl<sub>3</sub>)**

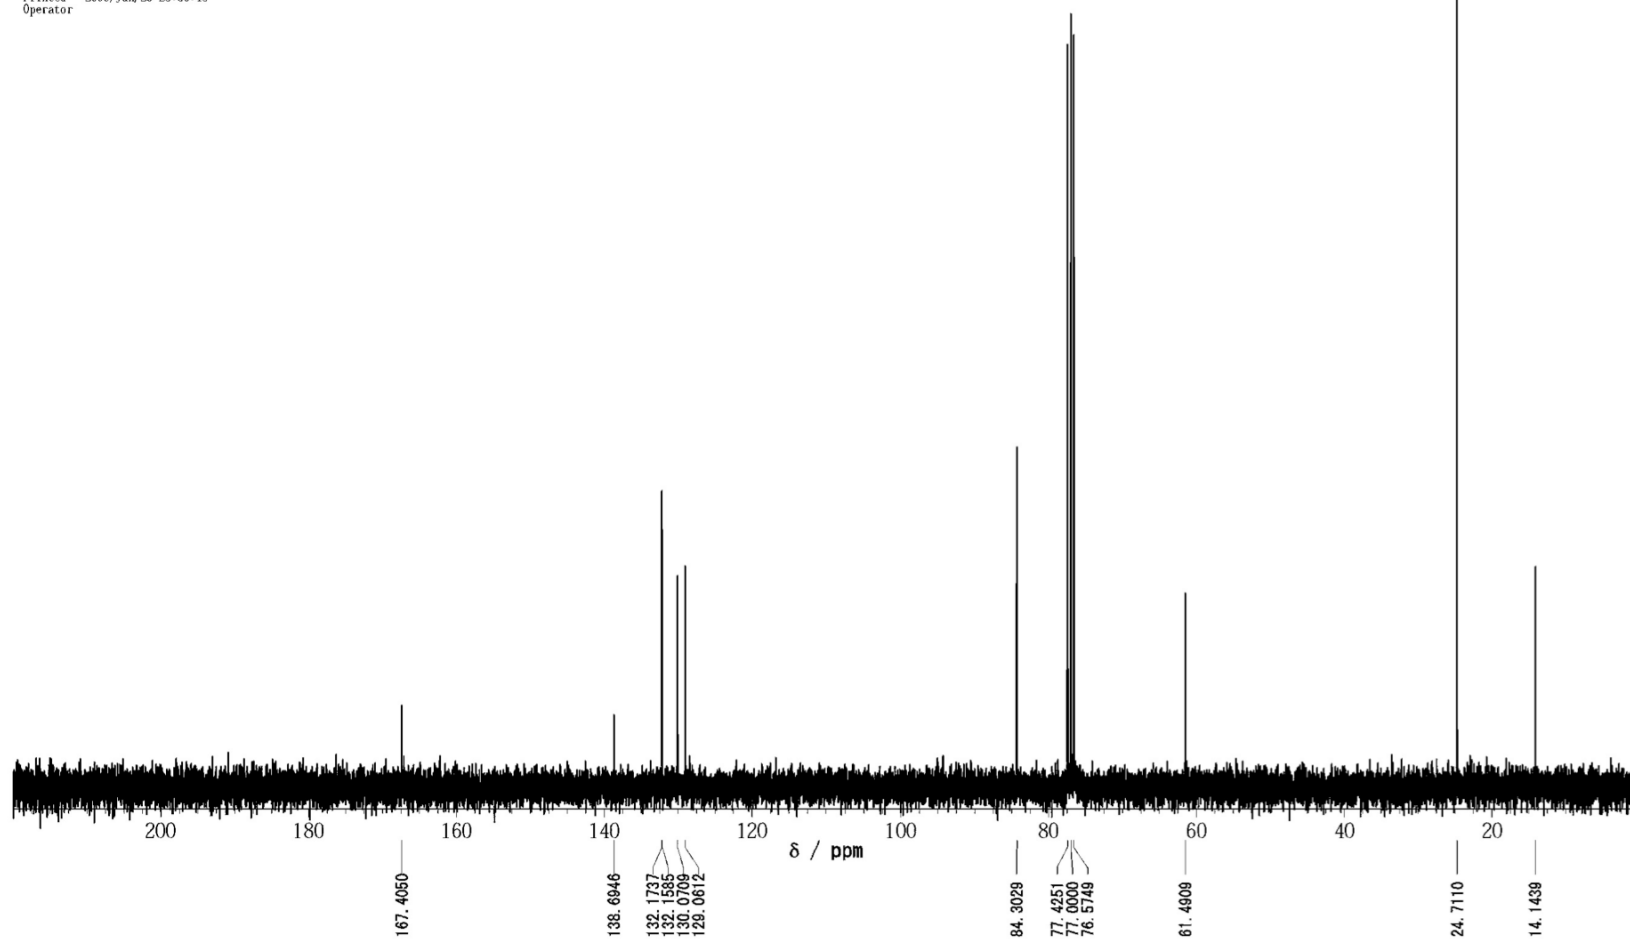

Original File:   
 Date: Oct 16 08   
 Comment: STANDARD 1H OBSERVE   
 ObsNuc: 1H   
 ExMode: NON   
 ObsFreq: 299.96 MHz   
 ObsSet: -1.0 kHz   
 ObsFine: 995.0047 Hz   
 Point: 16384   
 Frequency(Span): 4500.45 Hz   
 Scan: 16   
 AcqTime: 3.4983 s   
 PD: 1.502 s   
 Pulse1: 6.0  $\mu$ s   
 Temperature: 29.0  $^{\circ}$ C   
 Solvent: CDCl<sub>3</sub>   
 Reference: 0.0 ppm   
 Broad.Factor: 0.1373 Hz   
 RGain: 24   
 Printed: 2009/Mar/05 15:03:21   
 Operator:

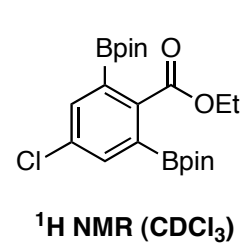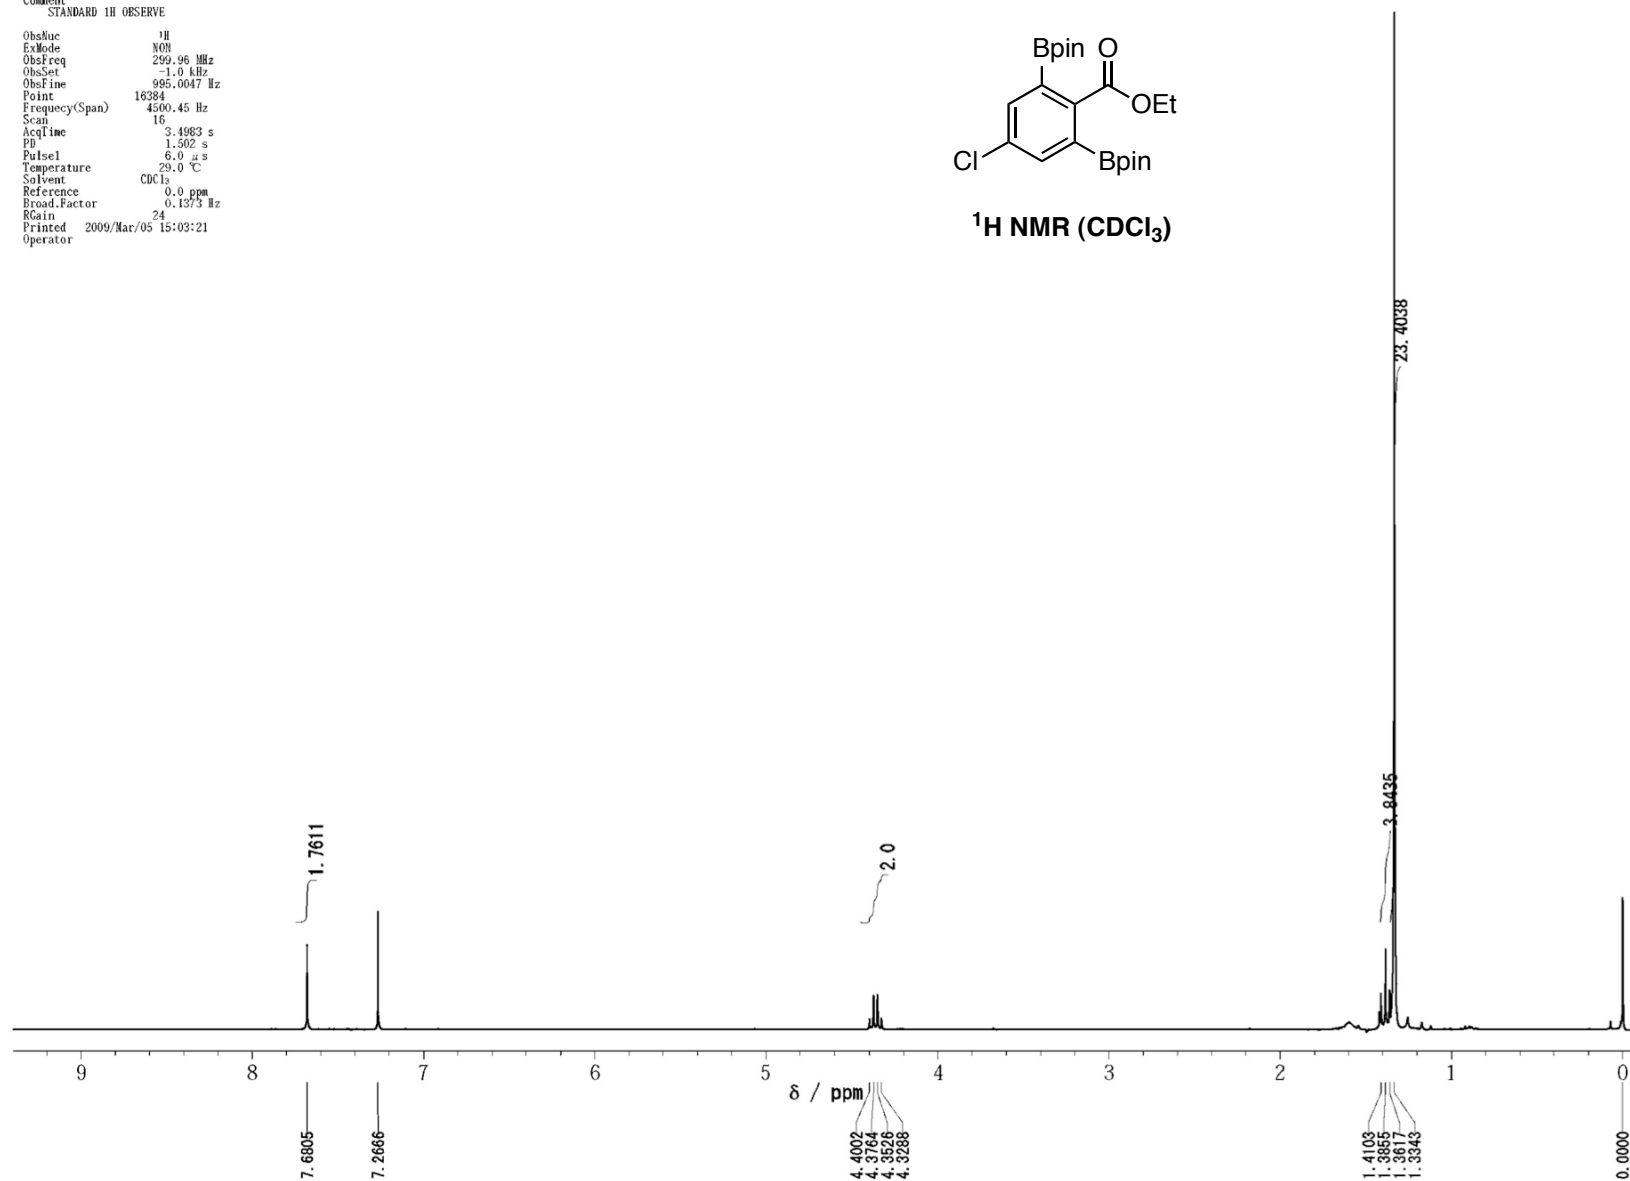



File C:\DOCUMENTS AND SETTINGS\北海道大学\MY DOCUMENTS\DELL NMR データ 06Q1YKAMORITAYSK717-16-29FR-1H.FID\FID.A  
 LS  
 Original File: C:\DOCUMENTS AND SETTINGS\北海道大学\MY DOCUMENTS\DELL NMR データ 06Q1YKAMORITAYSK717-16-29FR-1H  
 .FID\FID  
 Date Feb 3 09  
 Comment  
 STANDARD 1H OBSERVE  
 ObsNuc <sup>1</sup>H  
 ExMode NON  
 ObsFreq 299.96 MHz  
 ObsSet -1.0 kHz  
 ObsFine 995.0047 Hz  
 Point 16384  
 Frequency(Span) 4500.45 Hz  
 Scan 16  
 AcqTime 3.4983 s  
 PD 1.502 s  
 Pulse1 6.0  $\mu$ s  
 Temperature 29.0  $^{\circ}$ C  
 Solvent CDCl<sub>3</sub>  
 Reference 0.0 ppm  
 Broad.Factor 0.25 Hz  
 RGain 30  
 Printed 2009/Feb/03 22:14:05  
 Operator

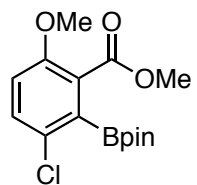

**3s**

<sup>1</sup>H NMR (CDCl<sub>3</sub>)

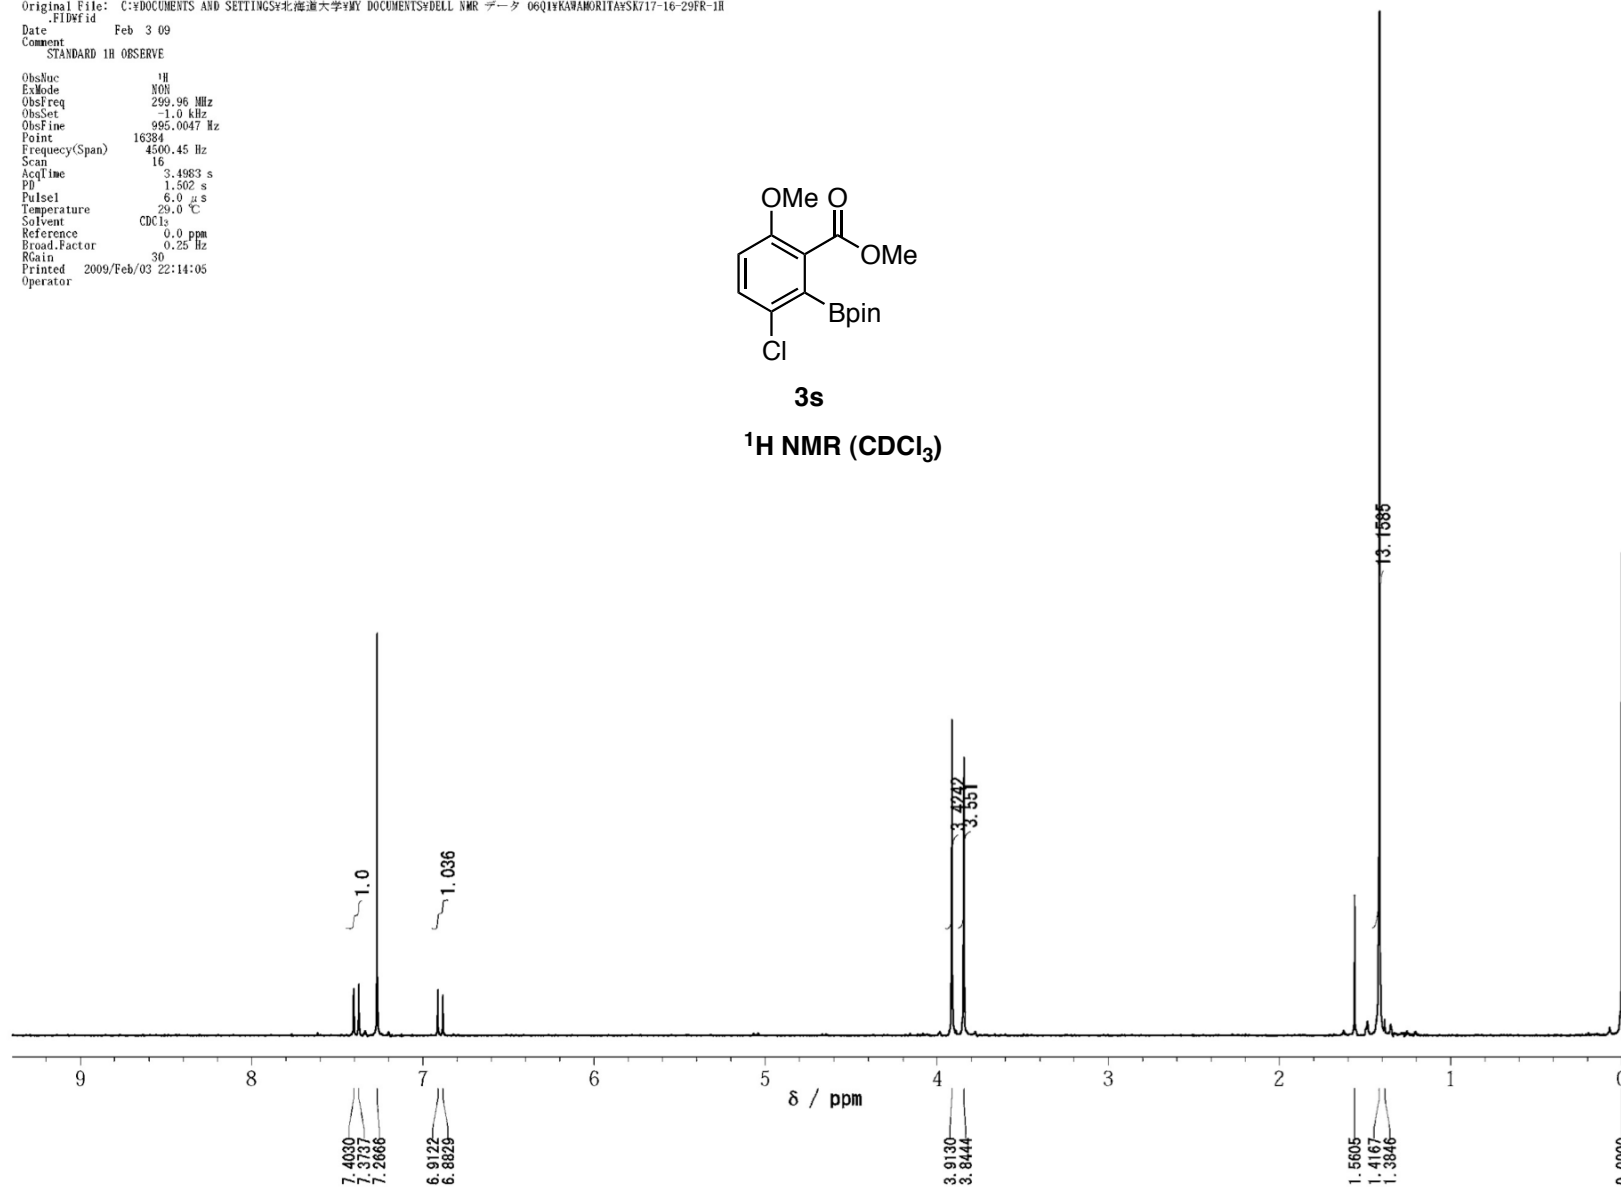

Original File:  
 Date Jan 25 09  
 Comment C13 Statdard Observe  
 Strick=none Tune=6.4 Match=0.4  
 ObsMod 13C  
 ExMode N00  
 ObsFreq 75.43 MHz  
 ObsSet -1.0 kHz  
 ObsFine 996.3672 Hz  
 Point 32768  
 Frequency(Span) 18761.73 Hz  
 Scan 64  
 AcqTime 1.4992 s  
 PD 1.501 s  
 Pulse 6.0  $\mu$ s  
 Temperature 29.0  $^{\circ}$ C  
 Solvent CDCl<sub>3</sub>  
 Reference 77.0 ppm  
 Broad.Factor 0.2863 Hz  
 RGain 30  
 Printed 2009/Jan/25 23:37:35  
 Operator

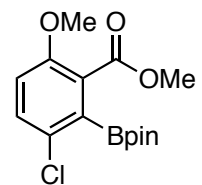

**3s**

<sup>13</sup>C NMR (CDCl<sub>3</sub>)

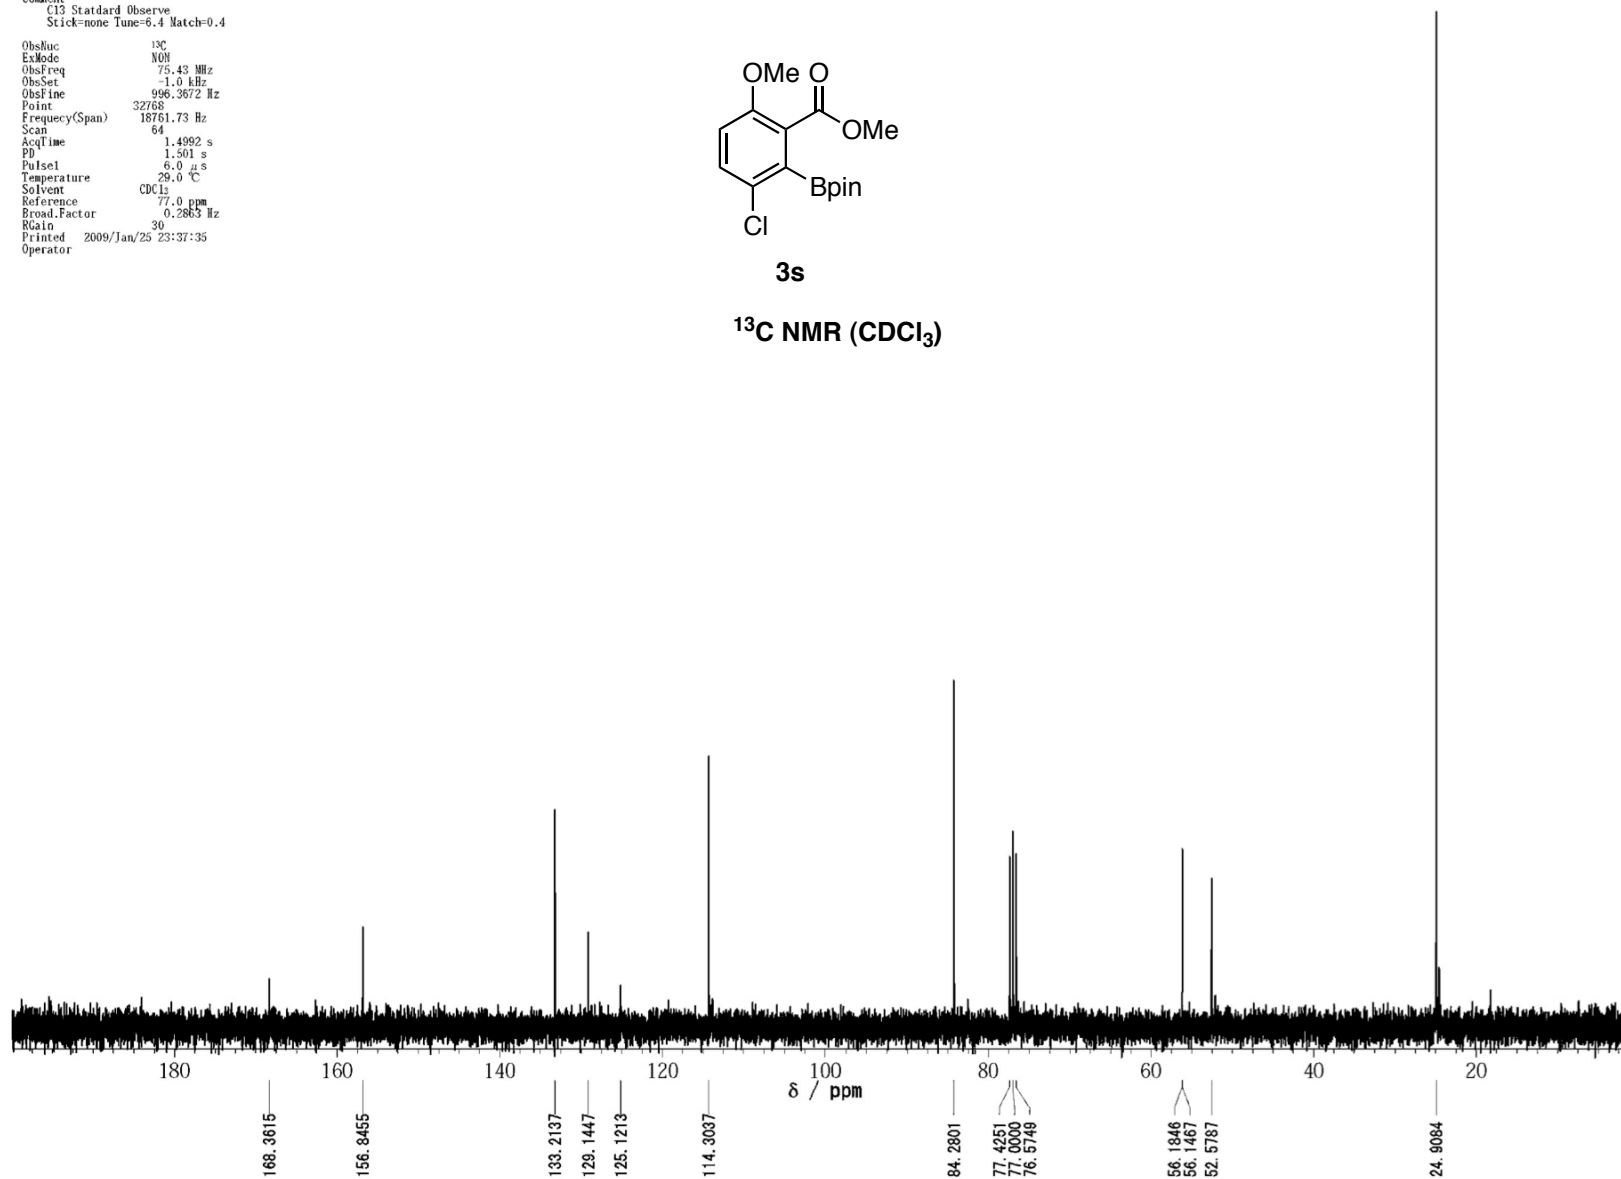

Supplement: Supplementary file 1 [file 4562065]
